# Supplementary material for: Storm Tilo over Europe in November 2007: storm surge and impacts on societal and energy infrastructure
Source: Copernicus journal article supplement (doi:10.5194/adgeo-49-187-2019), 2019-11-04
Supplement: Supplementary file 1 [file adgeo-49-187-2019-supplement.pdf]

Supplement of Adv. Geosci., 49, 187–196, 2019  
<https://doi.org/10.5194/adgeo-49-187-2019-supplement>  
© Author(s) 2019. This work is distributed under  
the Creative Commons Attribution 4.0 License.

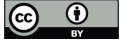

*Supplement of*

## **Storm Tilo over Europe in November 2007: storm surge and impacts on societal and energy infrastructure**

**Anthony James Kettle**

*Correspondence to:* Anthony James Kettle (ake3358@gmail.com)

The copyright of individual parts of the supplement might differ from the CC BY 4.0 License.

## S1 Tide gauge information

Table S1. Tide gauge information for 76 sites in the United Kingdom, France, the Netherlands, Germany, Denmark, and Norway. The sites have been ordered counter-clockwise around the North Sea with distances from Lerwick, UK.

| N   | Abb | Name                     | Co  | Distance (km) | Longitude | Latitude | Time Interval Original (min) | Time Interval Analysis (min) | Reference Sea Level (m) | Calculated Average Sea Level (m) |
|-----|-----|--------------------------|-----|---------------|-----------|----------|------------------------------|------------------------------|-------------------------|----------------------------------|
| [1] | [2] | [3]                      | [4] | [5]           | [6]       | [7]      | [8]                          | [9]                          | [10]                    | [11]                             |
| 1   | LW  | Lerwick                  | UK  | 0             | -1.14     | 60.15    | 15                           | 15                           | 1.329                   | 1.340                            |
| 2   | WK  | Wick                     | UK  | 238           | -3.09     | 58.44    | 15                           | 15                           | 2.058                   | 2.065                            |
| 3   | LE  | Leith                    | UK  | 518           | -3.18     | 55.99    | 15                           | 15                           | 3.216                   | 3.219                            |
| 4   | NS  | North Shields            | UK  | 670           | -1.44     | 55.01    | 15                           | 15                           | 3.014                   | 3.047                            |
| 5   | WH  | Whitby                   | UK  | 747           | -0.61     | 54.49    | 15                           | 15                           | 3.531                   | 3.608                            |
| 6   | IM  | Immingham                | UK  | 842           | -0.19     | 53.63    | 15                           | 15                           | 4.285                   | 4.349                            |
| 7   | CR  | Cromer                   | UK  | 955           | 1.30      | 52.93    | 15                           | 15                           | 3.001                   | 3.312                            |
| 8   | LT  | Lowestoft                | UK  | 1008          | 1.75      | 52.47    | 15                           | 15                           | 1.329                   | 1.905                            |
| 9   | FE  | Felixstowe               | UK  | 1057          | 1.35      | 51.96    | 15                           | 15                           | 2.196                   | 2.306                            |
| 10  | SH  | Sheerness                | UK  | 1123          | 0.74      | 51.44    | 15                           | 15                           | 3.125                   | 3.313                            |
| 11  | DV  | Dover                    | UK  | 1148          | 1.32      | 51.12    | 15                           | 15                           | 3.839                   | 3.913                            |
| 12  | CA  | Calais                   | FR  | 1202          | 1.87      | 50.97    | 60                           | 60                           | ?                       | 4.125                            |
| 13  | DK  | Dunkerque                | FR  | 1235          | 2.37      | 51.05    | 60                           | 60                           | ?                       | 3.476                            |
| 14  | CZ  | Cadzand                  | NE  | 1310          | 3.38      | 51.38    | 10                           | 10                           | 0.0                     | 0.208                            |
| 15  | WL  | Westkapelle              | NE  | 1322          | 3.43      | 51.52    | 10                           | 10                           | 0.0                     | 0.214                            |
| 16  | VL  | Vlissingen               | NE  | 1325          | 3.60      | 51.44    | 10                           | 10                           | 0.0                     | 0.259                            |
| 17  | TE  | Terneuzen                | NE  | 1330          | 3.83      | 51.33    | 10                           | 10                           | 0.0                     | 0.342                            |
| 18  | RM  | Roomport buiten          | NE  | 1340          | 3.68      | 51.62    | 10                           | 10                           | 0.0                     | 0.242                            |
| 19  | EU  | Euro platform            | NE  | 1344          | 3.28      | 51.99    | 10                           | 10                           | 0.0                     | 0.193                            |
| 20  | HW  | Hansweert                | NE  | 1347          | 4.00      | 51.45    | 10                           | 10                           | 0.0                     | 0.384                            |
| 21  | BA  | Bath                     | NE  | 1354          | 4.22      | 51.40    | 10                           | 10                           | 0.0                     | 0.434                            |
| 22  | BH  | Brouwershavensche Gat 08 | NE  | 1357          | 3.82      | 51.75    | 10                           | 10                           | 0.0                     | 0.316                            |
| 23  | LG  | Lichteiland Goeree       | NE  | 1360          | 3.67      | 51.93    | 10                           | 10                           | 0.0                     | 0.284                            |
| 24  | HH  | Hoek van Holland         | NE  | 1388          | 4.12      | 51.98    | 10                           | 10                           | 0.0                     | 0.340                            |
| 25  | SC  | Scheveningen             | NE  | 1404          | 4.26      | 52.10    | 10                           | 10                           | 0.0                     | 0.288                            |
| 26  | IJ  | Ijmuiden buitenhaven     | NE  | 1445          | 4.55      | 52.46    | 10                           | 10                           | 0.0                     | 0.304                            |
| 27  | DH  | Den Helder               | NE  | 1492          | 4.74      | 52.96    | 10                           | 10                           | 0.0                     | 0.273                            |
| 28  | OS  | Oudeschild               | NE  | 1503          | 4.85      | 53.03    | 10                           | 10                           | 0.0                     | 0.305                            |
| 29  | KW  | Kornwerderzand buiten    | NE  | 1530          | 5.33      | 53.07    | 10                           | 10                           | 0.0                     | 0.425                            |
| 30  | VH  | Vlieland haven           | NE  | 1537          | 5.09      | 53.30    | 10                           | 10                           | 0.0                     | 0.283                            |
| 31  | HL  | Harlingen                | NE  | 1542          | 5.41      | 53.18    | 10                           | 10                           | 0.0                     | 0.408                            |
| 32  | TL  | West-Terschelling        | NE  | 1549          | 5.22      | 53.36    | 10                           | 10                           | 0.0                     | 0.307                            |
| 33  | TN  | Terschelling Nordzee     | NE  | 1562          | 5.33      | 53.44    | 10                           | 10                           | 0.0                     | 0.237                            |
| 34  | NE  | Nes                      | NE  | 1582          | 5.77      | 53.43    | 10                           | 10                           | 0.0                     | 0.425                            |
| 35  | WG  | Wierumergronden          | NE  | 1598          | 5.96      | 53.52    | 10                           | 10                           | 0.0                     | 0.278                            |
| 36  | LR  | Lauwersoog               | NE  | 1599          | 6.20      | 53.41    | 10                           | 10                           | 0.0                     | 0.444                            |
| 37  | SM  | Schiermonnikoog          | NE  | 1604          | 6.20      | 53.47    | 10                           | 10                           | 0.0                     | 0.439                            |
| 38  | DF  | Delfzijl                 | NE  | 1622          | 6.93      | 53.33    | 10                           | 10                           | 0.0                     | 0.514                            |

|    |    |                           |    |      |       |       |    |    |      |       |
|----|----|---------------------------|----|------|-------|-------|----|----|------|-------|
| 39 | HG | Huibertgat                | NE | 1622 | 6.40  | 53.57 | 10 | 10 | 0.0  | 0.244 |
| 40 | NZ | Nieuwe Statenzijl         | NE | 1626 | 7.21  | 53.23 | 10 | 10 | 0.0  | 0.753 |
| 41 | EE | Eemshaven                 | NE | 1629 | 6.83  | 53.45 | 10 | 10 | 0.0  | 0.421 |
| 42 | EH | Emshörn                   | DE | 1634 | 6.84  | 53.49 | 1  | 10 | 5.02 | 5.519 |
| 43 | BK | Borkum-Südstrand          | DE | 1634 | 6.66  | 53.58 | 1  | 10 | 5.00 | 5.369 |
| 44 | BF | Borkum-Fischerbalje       | DE | 1635 | 6.75  | 53.56 | 1  | 10 | 5.03 | 5.454 |
| 45 | ND | Norderney-Riffgat         | DE | 1664 | 7.16  | 53.70 | 1  | 10 | 4.99 | 5.438 |
| 46 | SP | Spiekeroog                | DE | 1688 | 7.68  | 53.75 | 1  | 10 | 5.06 | 5.536 |
| 47 | WW | Wangerooge-West           | DE | 1697 | 7.87  | 53.78 | 1  | 10 | 5.03 | 5.465 |
| 48 | WN | Wangerooge-Nord           | DE | 1701 | 7.93  | 53.81 | 1  | 10 | 5.03 | 5.440 |
| 49 | MP | Mellumplate               | DE | 1704 | 8.09  | 53.77 | 1  | 10 | 5.02 | 5.428 |
| 50 | AW | Leuchtturm Alte Weser     | DE | 1713 | 8.13  | 53.86 | 1  | 10 | 4.96 | 5.361 |
| 51 | BZ | Bake Z                    | DE | 1732 | 8.31  | 54.01 | 1  | 10 | 5.00 | 5.420 |
| 52 | SN | Scharhörn                 | DE | 1733 | 8.47  | 53.97 | 1  | 10 | 4.99 | 5.377 |
| 53 | HE | Helgoland-Binnenhafen     | DE | 1734 | 7.89  | 54.18 | 1  | 10 | 5.00 | 5.397 |
| 54 | MG | Mittelgrund               | DE | 1735 | 8.64  | 53.94 | 1  | 10 | 5.00 | 5.463 |
| 55 | ZE | Zehnerloch                | DE | 1736 | 8.66  | 53.96 | 1  | 10 | 5.00 | 5.481 |
| 56 | HB | Hamburg-St. Pauli         | DE | 1740 | 9.97  | 53.55 | 1  | 10 | 5.00 | 5.868 |
| 57 | BU | Büsum                     | DE | 1757 | 8.86  | 54.12 | 1  | 10 | ?    | 5.478 |
| 58 | WI | Wittdün                   | DE | 1791 | 8.39  | 54.63 | 1  | 10 | ?    | 5.371 |
| 59 | HU | Husum                     | DE | 1792 | 9.03  | 54.47 | 1  | 10 | 5.00 | 5.489 |
| 60 | HR | Hörnum                    | DE | 1802 | 8.30  | 54.76 | 1  | 10 | 5.00 | 5.373 |
| 61 | HO | Højer                     | DK | 1831 | 8.66  | 54.96 | 10 | 10 | 0.0  | 0.582 |
| 62 | LS | List                      | DE | 1831 | 8.44  | 55.02 | 1  | 10 | 5.00 | 5.360 |
| 63 | HY | Havneby                   | DK | 1842 | 8.57  | 55.09 | 10 | 10 | 0.0  | 0.391 |
| 64 | BM | Ballum                    | DK | 1848 | 8.69  | 55.13 | 10 | 10 | 0.0  | 0.657 |
| 65 | RI | Ribe (Havet på forlandet) | DK | 1870 | 8.67  | 55.34 | 10 | 10 | 0.0  | 0.438 |
| 66 | EJ | Esbjerg                   | DK | 1879 | 8.42  | 55.47 | 10 | 10 | 0.0  | 0.309 |
| 67 | HV | Hvide Sande (Havet)       | DK | 1936 | 8.11  | 56.00 | 10 | 10 | 0.0  | 0.251 |
| 68 | TS | Thorsminde (Havn)         | DK | 1980 | 8.12  | 56.37 | 10 | 10 | 0.0  | 0.274 |
| 69 | TH | Thyborøn (Havet hofde 58) | DK | 2021 | 8.21  | 56.71 | 10 | 10 | 0.0  | 0.312 |
| 70 | HA | Hanstholm (Havn)          | DK | 2067 | 8.60  | 57.13 | 10 | 10 | 0.0  | 0.224 |
| 71 | HI | Hirtshals                 | DK | 2100 | 9.97  | 57.60 | 10 | 10 | 0.0  | 0.151 |
| 72 | SK | Skagen                    | DK | 2104 | 10.60 | 57.72 | 10 | 10 | 0.0  | 0.380 |
| 73 | TG | Tregde                    | NO | 2183 | 7.50  | 58.00 | 10 | 10 | ?    | 0.578 |
| 74 | SV | Stavanger                 | NO | 2346 | 5.73  | 58.97 | 10 | 10 | ?    | 0.698 |
| 75 | BG | Bergen                    | NO | 2501 | 5.30  | 60.40 | 10 | 10 | ?    | 0.973 |
| 76 | MY | Maløy                     | NO | 2637 | 5.10  | 61.90 | 10 | 10 | ?    | 1.209 |

Notes:

[1] Running index.

[2] Two letter station abbreviation used in manuscript.

[3] Station name.

[4] Country operating the tide gauge.

[5] Distance counter-clockwise around North Sea starting from Lerwick in the UK.

[6] Decimal longitude.

[7] Decimal latitude.

[8] Time interval of data in original data set.

[9] Time interval used in the spectral analysis; the one minute data for Germany have been averaged onto a 10 minute grid.

[10] Reported mean sea level on the scale of the tide gauge. For the UK, this is taken as the average water level for November, 2007 as presented in Bradshaw (2007). For Germany, the reference points for the water level gauges are taken from Pegel Online (<https://www.pegelonline.wsv.de>) where available. For the Netherlands and Denmark, null values are assumed. For France and Norway, no information is given about the mean sea level of the stations used here.

[11] Calculated average of the water level data for the 14 day interval 1 November 2007 00:00 GMT to 15 November 2007 00:00 GMT for the original time series data.

### **References for Table**

Bradshaw, E. (ed): Annual Report for 2007 for the UK National Tide Gauge Network and Related Sea Level Science, National Tide and Sea Level Facility, NERC 100017897 2007.

## S2 Tabulated information for weather-related incidents

Table S2. Large wave report and shipping/platform accidents in the North Sea during Storm Tilo 8–9 November 2007 (to support the Fig. 1 and Fig. 5 of the manuscript).

| N   | Abb | Name                | Long-<br>itude | Lat-<br>itude | Date<br>(GMT)<br>dd/mm/yyyy | Time<br>(GMT)<br>hh:mm | Uncer<br>time<br>(h) | Flag<br>wea | Flag<br>type | Nr.<br>rep | Source                                    |
|-----|-----|---------------------|----------------|---------------|-----------------------------|------------------------|----------------------|-------------|--------------|------------|-------------------------------------------|
| [1] | [2] | [3]                 | [4]            | [5]           | [6]                         | [7]                    | [8]                  | [9]         | [10]         | [11]       | [12]                                      |
| 1   | AUR | Aurelia             | 4.61           | 52.46         | 09/11/2007                  | 00:45                  | 0                    | Y           | i            | 1          | KW09                                      |
| 2   | BZZ | Buzzard<br>Platform | 0.89           | 57.84         | 09/11/2007                  | 12:00                  | 24                   | Y           | p            | 4          | LCW23,<br>UPS09,<br>UPS12                 |
| 3   | DNA | Daina               | 10.08          | 54.36         | 09/11/2007                  | 12:00                  | 24                   | Y           | c            | 3          | LCW23,<br>CL07                            |
| 4   | BLU | DS Blue<br>Wave     | 9.52           | 54.21         | 08/11/2007                  | 17:00                  | 0                    | N           | e            | 6          | LCW23,<br>CL07                            |
| 5   | EKO | Ekofisk             | 3.20           | 56.50         | 09/11/2007                  | 00:54                  | 0                    | Y           | p            | 2          | MD13,<br>DM17                             |
| 6   | EVA | Eva<br>Danielsen    | 2.43           | 51.83         | 09/11/2007                  | 06:00                  | 12                   | Y           | e            | 4          | LCW23,<br>CL07                            |
| 7   | FNO | FINO1               | 6.59           | 54.01         | 09/11/2007                  | 12:00                  | 6                    | Y           | p            | 1          | OEA08                                     |
| 8   | FLN | Flinterbaltica      | 1.84           | 55.28         | 09/11/2007                  | 10:00                  | 0                    | Y           | t            | 2          | LCW23                                     |
| 9   | HMX | Hamburg<br>Max      | 4.61           | 52.46         | 09/11/2007                  | 01:45                  | 0                    | Y           | i            | 1          | KW09                                      |
| 10  | LND | Linda               | 9.13           | 53.90         | 08/11/2007                  | 12:00                  | 24                   | N           | c            | 2          | LCW16,<br>CL07                            |
| 11  | MKR | Menkar              | 3.56           | 51.40         | 08/11/2007                  | 23:00                  | 0                    | Y           | i            | 1          | KW09                                      |
| 12  | NRD | Nordana<br>Andrea   | 10.08          | 54.36         | 09/11/2007                  | 12:00                  | 24                   | Y           | c            | 9          | LCW23,<br>CL07                            |
| 13  | NYK | NYK<br>Antares      | 5.84           | 53.75         | 09/11/2007                  | 03:12                  | 0                    | Y           | d            | 11         | LCW23,<br>CL07,<br>KW09,<br>KW22,<br>KW23 |
| 14  | SCH | Schelde<br>Highway  | 9.13           | 53.90         | 08/11/2007                  | 12:00                  | 24                   | N           | c            | 2          | LCW16,<br>CL07                            |
| 15  | ULR | Ulrika G            | 9.66           | 54.31         | 09/11/2007                  | 12:00                  | 24                   | N           | g            | 1          | CL07                                      |
| 16  | VLD | Vlieland            | 5.42           | 53.17         | 09/11/2007                  | 16:54                  | 0                    | Y           | e            | 1          | LCW23                                     |

Notes:

[1] Incident index

[2] Incident abbreviation used in figures of manuscript

[3] Name of ship or platform in incident

[4] Decimal longitude

[5] Decimal Latitude

[6] Date of incident (GMT)

[7] Time of incident (GMT)

[8] Range of uncertainty in time of report in hours; 24h indicates that an incident took place at some time on the reported day but more precise information is not available in the literature.

[9] Flag indicating that bad weather or sea state was mentioned in the incident description, or where a single large wave event is indicated.

[10] Flag indicating the type of incident: c is collision between two ships, d is containers lost overboard in a single wave incident, e is engine problems or power blackout, g is grounding, i is injury or man overboard, p is platform incident, t is deck cargo logs lost overboard.

[11] Number different report or updates of the incident among all the sources. Most of the sources have just one report of the incident, but Lloyd's Casualty Week typically carries a series of update reports in its week's summary with additional update reports in the following reports.

[12] Source list: CL07 is Cargo Law (2007); DM17 is Donelan and Magnusson (2017); KW09 is Kustwachtcentrum (2007a); KW22 is Kustwachtcentrum (2007b), KW23 is Kustwachtcentrum (2007c); LCW16 is Lloyds Casualty Week (2007a); LCW23 is Lloyds Casualty Week (2007b); MD13 is Magnusson and Donelan (2013); OEA08 is Outzen et al. (2008); UPS09 is Upstream (2007a); UPS12 is Upstream (2007b)

### References for Table

Cargo Law: International Vessel Casualties & Pirates Database for year 2007 - Jan Through Dec. 2007, [http://www.cargolaw.com/presentation\\_casualties.07.html](http://www.cargolaw.com/presentation_casualties.07.html)

Donelan, M.A. and Magnusson, A.-K.: The making of the Andrea wave and other rogues, *Scientific Reports*, 7, 44124, doi: 10.1038/srep44124, 2017.

Kristandt, J., Brecht, B., Frank, H., and Knack, H.: Optimization of empirical storm surge forecast-modeling of high resolution wind fields, *Die Küste*, 81, 301–348, 2014

Kustwachtcentrum: Press Report, Noordwester storm Info nr 1, time stamp: 09/11/2007 0930, 2007a.

Kustwachtcentrum: Press Report, Zoektocht naar verloren containers, info nr. 1, time stamp: 22/11/2007 1330, 2007b

Kustwachtcentrum: Press Report, Zoektocht naar verloren containers, info nr. 2, time stamp: 23/11/2007 1600, 2007c

Lloyd's Casualty Week: 16 Nov 2007a.

Lloyd's Casualty Week: 23 Nov 2007b.

Loewe, P.: *Atmosphärenphysik, System Nordsee. 2006 & 2007: Zustand und Entwicklungen*, ed. by P. Loewe, H. Klein, S. Welgelt-Krenz, *Berichte des Bundesamtes fuer Seeschifffahrt und Hydrographie*, pp. 37–114, Nr.49/2013

Magnusson, A.K. and Donelan, M.A.: The Andrea wave characteristics of a measured North Sea rogue wave, *Journal of Offshore Mechanics and Arctic Engineering*, 135, 2013.

Outzen, O., Herklotz, K., Heinrich, H., and Lefebvre, C.: Extreme waves at FINO 1 research platform caused by Storm 'Tilo' on 9 November 2007, *DEWI Magazin* No.33, 10pp, August 2008.

Upstream: Storm downs Nexen's Buzzard, contributor: Jonathan Davis, date stamp: 09 Nov 2007a.

Upstream: Storm clips Buzzard's wings, contributor: Anthea Pitt, date stamp: 12 Nov 2007b.

### S3 Tabulated information on literature reports of skew surge during the storm

Table S3. Literature reports of skew surges for stations around the North Sea during Storm Tilo. A given station has at least one and up to three skew surge reports from different sources. Note that the different national sea level agencies have slightly different methods of reporting the skew surge concept. For example in the UK, it is calculated as the measured water level minus the expected high tide level based on a model of the different spectral tide components over a long period. In Germany, the skew surge concept is reported as the measured water level minus the average of the high tide levels over a long period of time.

| Station name                   | CO  | Longi-<br>tude | Lati-<br>tude | Nr  | Skew<br>Surge1<br>(m) | T1  | Ref1     | Skew<br>Surge2<br>(m) | T2   | Ref2   | Skew<br>surge3<br>(m) | T3   | Ref3 |
|--------------------------------|-----|----------------|---------------|-----|-----------------------|-----|----------|-----------------------|------|--------|-----------------------|------|------|
| [1]                            | [2] | [3]            | [4]           | [5] | [6]                   | [7] | [8]      | [9]                   | [10] | [11]   | [12]                  | [13] | [14] |
| Felixstowe                     | UK  | 1.35           | 51.96         | 2   | 1.180                 | 0   | NTLSF13a | 0.971                 | 2    | B07    |                       |      |      |
| Lowestoft                      | UK  | 1.75           | 52.47         | 2   | 1.642                 | 0   | NTLSF13a | 1.555                 | 2    | B07    |                       |      |      |
| Whitby                         | UK  | -0.61          | 54.49         | 1   | 1.027                 | 0   | NTLSF13a |                       |      |        |                       |      |      |
| Dover                          | UK  | 1.32           | 51.11         | 1   | 1.263                 | 0   | NTLSF13b |                       |      |        |                       |      |      |
| Sheerness (Kent)               | UK  | 1.75           | 52.47         | 1   | 1.338                 | 2   | EA12     |                       |      |        |                       |      |      |
| Whitby (Yorkshire)             | UK  | -0.61          | 54.49         | 1   | 1.009                 | 2   | B07      |                       |      |        |                       |      |      |
| Cromer                         | UK  | 1.30           | 52.93         | 1   | 1.009                 | 2   | B07      |                       |      |        |                       |      |      |
| Nieuwpoort                     | BE  | 2.73           | 51.15         | 1   | 1.342                 | 2   | VH16     |                       |      |        |                       |      |      |
| Oostende                       | BE  | 2.93           | 51.23         | 1   | 1.534                 | 2   | VH16     |                       |      |        |                       |      |      |
| Zeebrugge                      | BE  | 3.20           | 51.35         | 1   | 1.504                 | 2   | VH16     |                       |      |        |                       |      |      |
| Vlissingen                     | NE  | 3.60           | 51.45         | 1   | 1.400                 | 0   | RWS07c   |                       |      |        |                       |      |      |
| Roompot buiten                 | NE  | 3.67           | 51.62         | 1   | 1.700                 | 0   | RWS07c   |                       |      |        |                       |      |      |
| Hoek van Holland               | NE  | 4.12           | 51.98         | 1   | 1.850                 | 0   | RWS07c   |                       |      |        |                       |      |      |
| Den Helder                     | NE  | 4.75           | 52.97         | 1   | 1.900                 | 0   | RWS07c   |                       |      |        |                       |      |      |
| Harlingen                      | NE  | 5.42           | 53.17         | 1   | 2.340                 | 0   | RWS07c   |                       |      |        |                       |      |      |
| Delfzijl                       | NE  | 6.93           | 53.33         | 1   | 2.680                 | 0   | RWS07c   |                       |      |        |                       |      |      |
| Station Wattenmeer             | DE  | 7.67           | 53.75         | 2   | 2.130                 | 0   | REA09    | 2.150                 | 0    | BEA09  |                       |      |      |
| Norderney                      | DE  | 7.15           | 53.70         | 3   | 2.550                 | 0   | KEA14    | 2.550                 | 0    | H07    | 2.550                 | 0    | H08  |
| Langeoog                       | DE  | 7.50           | 53.72         | 1   | 2.530                 | 0   | H07      |                       |      |        |                       |      |      |
| Spiekeroog                     | DE  | 7.68           | 53.75         | 1   | 2.580                 | 0   | H07      |                       |      |        |                       |      |      |
| Wangerooge                     | DE  | 7.87           | 53.78         | 1   | 2.630                 | 0   | H07      |                       |      |        |                       |      |      |
| Knock                          | DE  | 7.03           | 53.33         | 1   | 3.110                 | 0   | H07      |                       |      |        |                       |      |      |
| Emden                          | DE  | 7.18           | 53.33         | 2   | 3.290                 | 0   | H07      | 3.150                 | 7    | HEA10a |                       |      |      |
| Emssperrwerk                   | DE  | 7.31           | 53.32         | 2   | 3.440                 | 0   | WIKI18a  | 3.280                 | 0    | L08    |                       |      |      |
| Leyhoern                       | DE  | 7.03           | 53.55         | 1   | 2.780                 | 0   | H07      |                       |      |        |                       |      |      |
| Bensersiel                     | DE  | 7.58           | 53.67         | 1   | 2.760                 | 0   | H07      |                       |      |        |                       |      |      |
| Leuchtturm Alte<br>Weser       | DE  | 8.13           | 53.87         | 1   | 2.460                 | 0   | H07      |                       |      |        |                       |      |      |
| Wilhelmshaven                  | DE  | 8.12           | 53.53         | 1   | 3.080                 | 0   |          |                       |      |        |                       |      |      |
| Cuxhaven                       | DE  | 8.72           | 53.87         | 3   | 2.910                 | 0   | H07      | 2.900                 | 0    | L13    | 2.740                 | 6    | GB09 |
| Helgoland                      | DE  | 7.88           | 54.18         | 1   | 2.500                 | 0   | L08      |                       |      |        |                       |      |      |
| Hamburg St Pauli               | DE  | 9.79           | 53.55         | 3   | 3.300                 | 0   | L08      | 3.330                 | 0    | KIT07  | 3.330                 | 0    | AB13 |
| FINO1                          | DE  | 6.59           | 54.01         | 1   | 2.800                 | 0   | OEA08    |                       |      |        |                       |      |      |
| Bremerhaven Alte<br>Lauchtturm | DE  | 8.57           | 53.55         | 1   | 3.000                 | 7   | HEA10a   |                       |      |        |                       |      |      |
| Langeoog Back<br>Barrier       | DE  | 7.47           | 53.70         | 1   | 3.010                 | 7   | HW14     |                       |      |        |                       |      |      |
| Thisted Havn                   | DK  | 8.70           | 57.00         | 1   | 1.065                 | 2   | KDI17    |                       |      |        |                       |      |      |

Notes:

[1] Water level station name

[2] Country: UK, United Kingdom; BE, Belgium; NE, The Netherlands; DE, Germany; DK, Denmark

[3] Decimal longitude

[4] Decimal latitude

[5] Number of skew surge reports from different sources

[6] Value of skew surge from report 1

[7] Processing key for skew surge report 1: 0, skew surge number given in report and used without alteration; 2, skew surge calculated as the difference between the reported water level and the average high tide; 7, skew surge calculated from digitized low and high tide water levels for a short data time series across the period of the storm.

[8] Reference key for skew surge report 1: AB13, AON Benfield (2013); B07, Bradshaw (2007); BEA09, Badewien et al. (2009); EA12, Environment Agency (2012); GB09, Gönnert and Buss (2009); H07, Heyken (2007); H08, Heyken (2008); HEA10a, Herrling et al. (2010); HW14, Herrling and Winter (2014); KDI17, Ditlevsen et al. (2018); KEA14, Kristandt et al. (2014); KIT07, Karlsruhe Institute of Technology (2007); L08, Lefebvre (2008); L13, Loewe (2013); NTLFSF13a, National Tide and Sea Level Facility (2013a); NTLFSF13b, National Tide and Sea Level Facility (2013); OEA08, Outzen et al. (2008); REA09, Reuter et al. (2009); RWS07c, Rijkswaterstaat (2007); VH16, Vlaamse Hydrografie (2016); WIKI18a, WIKI.

[9] as for [6] but for report 2

[10] as for [7] but for report 2

[11] as for [8] but for report 2

[12] as for [6] but for report 3

[13] as for [7] but for report 3

[14] as for [8] but for report 3

## References for Table

AON Benfield: Historie von 1703 bis 2012: Winterstuerme in Europe, Stand: Januar 2013.

Bradshaw, E. (ed): Annual Report for 2007 for the UK National Tide Gauge Network and Related Sea Level Science, National Tide and Sea Level Facility, NERC 100017897 2007.

Badewien, T.H., Zimmer, E., Bartholoma, A., and Reuter R.: Towards continuous long-term measurements of suspended particulate matter (SPM) in turbid coastal waters, *Ocean Dynamics*, 59, 227–238, 2009.

Ditlevsen C., Merino Ramos, M., Sørensen, C., Ciocan, U.R., and Piotkowitz, T.: Højvandsstatistikker 2017, Kystdirektoratet, Februar 2018.

Environment Agency, Thames Barrier Project Pack, 2012.

Gönnert, G., and Buss, T.: Sturmfluten zur Bemessung von Hochwasserschutzanlagen, *Berichte des Landesbetriebes Strassen, Bruecken und Gewaesser Nr.2/2009*

Herrling, G. and C Winter, C.: Morphological and sedimentological response of a mixed-energy barrier island tidal inlet to storm and fair-weather conditions, *Earth Surf. Dynam.*, 2, 363–382, 2014.

Herrling, G., Knaack, H., Kaiser, R., and Niemayer, H.D.: Evaluation of design water levels at the Ems-Dollard estuary considering the effect of a storm surge barrier, *Coastal Engineering*, 2010.

Heyken, H.: Schwere Sturmflut an niedersächsischer Nordseeküste - Dunnenabbrüche auf den Inseln, NLWKN Niedersächsischer Landesbetrieb fuer Wasserwirtschaft, Kuesten- und Naturschutz, 09/11/2007.



Heyken, H.: 15 Sturmfluten sind keine Boten des Klimawandels, in Herma Heyken (ed), Jahresbericht 2007, NLWKN Niedersaechsischer Landesbetrieb fuer Wasserwirtschaft, Kuesten- und Naturschutz, pp14–15, Norden, April, 2008

Karlsruhe Institute of Technology: Sturm, Schnee, Regen. Mitteleuropa/Schwarzes Meer 09.-13.11.2007 (text CE), Wettergefahren-Fruehwarnung, Institut fuer Meteorologie und Klimaforschung, (document time stamp: Samstag, 17.November 2007, 18:00MEZ) 2007.

Lefebvre, C.: Orkan TILO am 8. und 9. November 2007, DWD report 01Jan2008

National Tide and Sea Level Facility, website summary: <http://www.ntsfl.org/storm-surges/storm-surge-climatology/england-east>, last access 2013a.

National Tide and Sea Level Facility, website summary: <http://www.ntsfl.org/storm-surges/storm-surge-climatology/england-south>, last access 2013b.

Outzen, O., Herklotz, K., Heinrich, H., and Lefebvre, C.: Extreme waves at FINO1 research platform caused by storm 'Tilo' on 9 November 2007, DEWI Magazin No. 33, August 2008.

Reuter R., TH Badewien, T.H., Bartholoma, A., Braun, A., Luebben, A., and Rullkoetter, J.: A hydrographic time series station in the Wadden Sea (southern North Sea), Ocean Dynamics, DOI 10.1007/s10236-009-0196-3, 2009.

Rijkswaterstaat: Verslag van de Stormvloed van 9 november 2007 (SR88), Ministerie van Verkeer en Waterstaat, Directoraat-Generaal Rijkswaterstaat, Waterdienst, Stormvloedwaarschuwingsdienst/SVSD, Postbus 17, 8200 AA Lelystad, [www.svsd.nl](http://www.svsd.nl), Lelystad, 45 pp., november 2007.

Vlaamse Hydrografie, Overzicht van de Tijwaarnemingen Langs de Belgische Kust. Periode 2001-2010 voor Nieuwpoort, Oostende en Zeebrugge, Ministerie van de Vlaamse Gemeenschap, Agentschap Maritieme Dienstverlening en Kust, Afdeling Kust, Vlaamse Hydrografie, Oostende (document time stamp=24 Feb 2016, document author=beirenro), 2016.

WIKI, Liste der Sturmfluten an der Nordsee, [https://de.wikipedia.org/wiki/Liste\\_der\\_Sturmfluten\\_an\\_der\\_Nordsee](https://de.wikipedia.org/wiki/Liste_der_Sturmfluten_an_der_Nordsee) (accessed 24 March 2018).

#### S4 Tabulated skew surge based on an analysis the tide gauge records in this study

Table S4. Skew surge for stations around the North Sea during Storm Britta from Kettle (2018)

| Index | Name of Station       | Distance around North Sea from Lerwick (km) | Longitude | Latitude | Skew Surge (m) |
|-------|-----------------------|---------------------------------------------|-----------|----------|----------------|
| 1     | Aberdeen              | 386                                         | -2.07     | 57.14    | 0.220          |
| 2     | Leith                 | 518                                         | -3.18     | 55.99    | 0.109          |
| 3     | North Shields         | 670                                         | -1.44     | 55.01    | 0.430          |
| 4     | Whitby                | 747                                         | -0.61     | 54.49    | 0.716          |
| 5     | Immingham             | 842                                         | -0.19     | 53.63    | 0.621          |
| 6     | Cromer                | 955                                         | 1.30      | 52.93    | 1.121          |
| 7     | Lowestoft             | 1008                                        | 1.75      | 52.47    | 1.362          |
| 8     | Harwich               | 1057                                        | 1.29      | 51.95    | 0.999          |
| 9     | Sheerness             | 1123                                        | 0.74      | 51.45    | 0.904          |
| 10    | Dover                 | 1148                                        | 1.32      | 51.11    | 0.678          |
| 11    | Vlissingen            | 1325                                        | 3.60      | 51.44    | 1.265          |
| 12    | Roompot buiten        | 1340                                        | 3.68      | 51.62    | 1.372          |
| 13    | Europlatform          | 1344                                        | 3.28      | 51.99    | 1.472          |
| 14    | Lichteiland Goeree    | 1360                                        | 3.67      | 51.93    | 1.479          |
| 15    | Hoek van Holland      | 1388                                        | 4.12      | 51.98    | 1.532          |
| 16    | Scheveningen          | 1404                                        | 4.26      | 52.10    | 1.645          |
| 17    | Ijmuiden buitenhaven  | 1445                                        | 4.55      | 52.46    | 1.834          |
| 18    | Den Helder            | 1492                                        | 4.74      | 52.96    | 1.843          |
| 19    | Texel Noordzee        | 1531                                        | 4.73      | 53.12    | 1.639          |
| 20    | Vlieland Haven        | 1537                                        | 5.09      | 53.30    | 1.950          |
| 21    | Harlingen             | 1542                                        | 5.41      | 53.18    | 2.425          |
| 22    | West Terschelling     | 1549                                        | 5.22      | 53.36    | 2.017          |
| 23    | Terschelling Noordzee | 1562                                        | 5.33      | 53.44    | 1.864          |
| 24    | Wierumergronden       | 1598                                        | 5.96      | 53.52    | 1.930          |
| 25    | Lauwersoog            | 1599                                        | 6.20      | 53.41    | 2.888          |
| 26    | Schiermonnikoog       | 1604                                        | 6.20      | 53.47    | 2.692          |
| 27    | Huibertgat            | 1622                                        | 6.40      | 53.57    | 2.298          |
| 28    | Delfzijl              | 1622                                        | 6.93      | 53.33    | 3.681          |
| 29    | Nieuwe Statenzijl     | 1626                                        | 7.21      | 53.23    | 4.195          |
| 30    | Eemshaven             | 1629                                        | 6.83      | 53.45    | 3.099          |
| 31    | Borkum-Sudstrand      | 1634                                        | 6.66      | 53.58    | 2.659          |
| 32    | Borkum-Fischerbalje   | 1635                                        | 6.75      | 53.56    | 2.835          |
| 33    | Norderney Riffgat     | 1664                                        | 7.16      | 53.70    | 2.761          |
| 34    | Langeoog              | 1675                                        | 7.52      | 53.72    | 2.960          |
| 35    | Spiekeroog            | 1688                                        | 7.68      | 53.75    | 2.905          |
| 36    | Wangerooge-West       | 1697                                        | 7.87      | 53.78    | 2.836          |
| 37    | Wangerooge-Nord       | 1701                                        | 7.93      | 53.81    | 2.329          |
| 38    | Leuchtturm Alte Weser | 1713                                        | 8.13      | 53.86    | 2.318          |
| 39    | Bake Z                | 1732                                        | 8.31      | 54.01    | 2.062          |
| 40    | Scharhorn             | 1733                                        | 8.47      | 53.97    | 2.258          |
| 41    | Helgoland Binnenhafen | 1734                                        | 7.89      | 54.18    | 1.886          |
| 42    | Zehnerloch            | 1736                                        | 8.66      | 53.96    | 2.299          |
| 43    | Busum                 | 1757                                        | 8.86      | 54.12    | 2.112          |
| 44    | Wittdün               | 1791                                        | 8.39      | 54.63    | 1.601          |
| 45    | Husum                 | 1792                                        | 9.03      | 54.47    | 1.961          |
| 46    | Hörnum                | 1802                                        | 8.30      | 54.76    | 1.489          |

|    |                  |      |       |       |       |
|----|------------------|------|-------|-------|-------|
| 47 | List             | 1831 | 8.44  | 55.02 | 1.561 |
| 48 | Hojer            | 1831 | 8.46  | 54.96 | 1.751 |
| 49 | Havneby Havn     | 1842 | 8.57  | 55.09 | 1.472 |
| 50 | Ballum Sluse     | 1848 | 8.69  | 55.13 | 1.781 |
| 51 | Ribe Kammersluse | 1870 | 8.68  | 55.34 | 1.531 |
| 52 | Esbjerg Havn     | 1879 | 8.42  | 55.47 | 1.196 |
| 53 | Hvide Sand Havet | 1936 | 8.11  | 56.00 | 1.177 |
| 54 | Hvide Sand Havn  | 1936 | 8.13  | 56.00 | 1.309 |
| 55 | Thorsminde Havet | 1980 | 8.11  | 56.37 | 1.251 |
| 56 | Thorsminde Havn  | 1980 | 8.12  | 56.37 | 1.353 |
| 57 | Ferring Havet    | 1999 | 8.12  | 56.52 | 1.129 |
| 58 | Thyboren Havn    | 2021 | 8.22  | 56.71 | 0.998 |
| 59 | Hirtshals Havn   | 2100 | 9.96  | 57.60 | 0.609 |
| 60 | Skagen Havn      | 2104 | 10.60 | 57.72 | 0.818 |

## S5 Tabulated diagnostics related to Fig. 5 of the main manuscript

Table S5. Information of the e-folding decay times of the highest oscillation during Storm Tilo 8–9 November 2007

| N   | Abb | Name                        | N   | Start of<br>first<br>oscillation<br>(days) | End of<br>last<br>oscillation<br>(days) | Time<br>span<br>(hours) | e-fold<br>decay<br>time<br>(hours) | Height of<br>highest<br>oscillation<br>(cm) | Period of<br>highest<br>oscillation<br>(hours) |
|-----|-----|-----------------------------|-----|--------------------------------------------|-----------------------------------------|-------------------------|------------------------------------|---------------------------------------------|------------------------------------------------|
| [1] | [2] | [3]                         | [4] | [5]                                        | [6]                                     | [7]                     | [8]                                | [9]                                         | [10]                                           |
| 1   | LW  | Lerwick                     | 3   | 8.448                                      | 8.542                                   | 1.375                   | 4.729                              | 13.5                                        | 0.502                                          |
| 2   | WK  | Wick                        | 2   | 8.667                                      | 8.719                                   | 0.624                   | 1.810                              | 9.6                                         | 0.749                                          |
| 3   | LE  | Leith                       | 2   | 7.333                                      | 7.688                                   | 4.248                   | 9.624                              | 25.5                                        | 3.751                                          |
| 4   | NS  | North Shields               | 2   | 7.896                                      | 8.031                                   | 1.625                   | 3.961                              | 10.7                                        | 2.251                                          |
| 5   | WH  | Whitby                      | 5   | 7.385                                      | 7.802                                   | 8.002                   | 8.208                              | 12.4                                        | 3.250                                          |
| 6   | IM  | Immingham                   | 3   | 7.969                                      | 8.229                                   | 4.500                   | 7.894                              | 16.8                                        | 1.750                                          |
| 7   | CR  | Cromer                      | 4   | 7.938                                      | 8.177                                   | 3.876                   | 4.187                              | 33.2                                        | 3.250                                          |
| 8   | LT  | Lowestoft                   | 4   | 7.594                                      | 8.021                                   | 8.124                   | 7.314                              | 36.6                                        | 3.499                                          |
| 9   | FE  | Felixstowe                  | 4   | 7.656                                      | 8.010                                   | 6.499                   | 5.775                              | 28.0                                        | 3.250                                          |
| 10  | SH  | Sheerness                   | 3   | 7.719                                      | 8.083                                   | 6.374                   | 3.549                              | 25.3                                        | 3.749                                          |
| 11  | DV  | Dover                       | 3   | 8.292                                      | 8.635                                   | 6.250                   | 3.596                              | 37.5                                        | 3.499                                          |
| 12  | CA  | Calais                      | 3   | 8.333                                      | 8.833                                   | 8.002                   | 14.484                             | 34.8                                        | 3.000                                          |
| 13  | DK  | Dunkerque                   | 3   | 8.208                                      | 8.708                                   | 7.500                   | 9.910                              | 32.8                                        | 4.000                                          |
| 14  | CZ  | Cadzand                     | 4   | 7.868                                      | 8.243                                   | 6.835                   | 5.162                              | 57.6                                        | 3.166                                          |
| 15  | WL  | Westkapelle                 | 2   | 7.368                                      | 7.688                                   | 3.833                   | 8.174                              | 54.5                                        | 3.499                                          |
| 16  | VL  | Vlissingen                  | 3   | 7.875                                      | 8.194                                   | 5.669                   | 2.196                              | 49.8                                        | 3.334                                          |
| 17  | TE  | Terneuzen                   | 3   | 7.896                                      | 8.243                                   | 6.499                   | 2.724                              | 58.7                                        | 3.168                                          |
| 18  | RM  | Roomport buiten             | 3   | 8.236                                      | 8.340                                   | 1.750                   | 0.793                              | 63.1                                        | 1.166                                          |
| 19  | EU  | Euro platform               | 2   | 8.021                                      | 8.194                                   | 2.083                   | 1.994                              | 32.4                                        | 3.502                                          |
| 20  | HW  | Hansweert                   | 3   | 7.750                                      | 8.090                                   | 5.666                   | 4.903                              | 54.1                                        | 3.833                                          |
| 21  | BA  | Bath                        | 2   | 7.938                                      | 8.278                                   | 4.085                   | 6.701                              | 63.1                                        | 3.334                                          |
| 22  | BH  | Brouwershavensche<br>Gat 08 | 4   | 8.326                                      | 8.583                                   | 4.915                   | 9.287                              | 57.9                                        | 1.834                                          |
| 23  | LG  | Lichteiland Goeree          | 5   | 7.389                                      | 7.924                                   | 10.750                  | 15.232                             | 26.1                                        | 3.499                                          |
| 24  | HH  | Hoek van Holland            | 3   | 8.056                                      | 8.208                                   | 2.083                   | 1.570                              | 43.0                                        | 2.832                                          |
| 25  | SC  | Scheveningen                | 3   | 8.021                                      | 8.118                                   | 1.416                   | 2.156                              | 57.0                                        | 1.000                                          |
| 26  | IJ  | Ijmuiden<br>buitenhaven     | 2   | 7.986                                      | 8.097                                   | 1.334                   | 4.190                              | 51.7                                        | 1.668                                          |
| 27  | DH  | Den Helder                  | 3   | 8.000                                      | 8243                                    | 3.751                   | 1.807                              | 48.1                                        | 3.334                                          |
| 28  | OS  | Oudeschild                  | 3   | 7.500                                      | 7.764                                   | 4.250                   | 1.620                              | 23.5                                        | 3.667                                          |
| 29  | KW  | Kornwerderzand<br>buiten    | 2   | 8.611                                      | 8.868                                   | 3.082                   | 3.257                              | 34.0                                        | 3.334                                          |
| 30  | VH  | Vlieland haven              | 3   | 7.521                                      | 7.743                                   | 3.330                   | 1.550                              | 19.4                                        | 3.502                                          |
| 31  | HL  | Harlingen                   | 3   | 8.632                                      | 8.868                                   | 3.418                   | 2.453                              | 40.6                                        | 3.334                                          |
| 32  | TL  | West-Terschelling           | 2   | 8.257                                      | 8.319                                   | 0.750                   | 0.954                              | 24.4                                        | 0.667                                          |
| 33  | TN  | Terschelling<br>Nordzee     | 4   | 7.986                                      | 8.111                                   | 2.500                   | 2.684                              | 60.9                                        | 0.667                                          |
| 34  | NE  | Nes                         | 3   | 7.569                                      | 7.813                                   | 3.749                   | 2.127                              | 19.5                                        | 3.334                                          |
| 35  | WG  | Wierumergronden             | 2   | 7.750                                      | 7.917                                   | 2.000                   | 1.338                              | 29.0                                        | 3.499                                          |
| 36  | LR  | Lauwersoog                  | 2   | 8.667                                      | 8.840                                   | 2.083                   | 1.503                              | 21.6                                        | 3.499                                          |
| 37  | SM  | Schiermonnikoog             | 3   | 8.153                                      | 8.438                                   | 4.334                   | 5.699                              | 25.7                                        | 3.833                                          |
| 38  | DF  | Delfzijl                    | 8   | 8.458                                      | 8.736                                   | 5.834                   | 5.147                              | 60.2                                        | 0.835                                          |
| 39  | HG  | Huibertgat                  | 3   | 7.604                                      | 7.924                                   | 5.582                   | 3.340                              | 37.2                                        | 3.665                                          |
| 40  | NZ  | Nieuwe Statenzijl           | 5   | 7.701                                      | 8.056                                   | 6.833                   | 3.075                              | 93.2                                        | 2.501                                          |

|    |    |                           |   |       |       |        |        |      |       |
|----|----|---------------------------|---|-------|-------|--------|--------|------|-------|
| 41 | EE | Eemshaven                 | 3 | 8.201 | 8.264 | 1.001  | 0.880  | 42.1 | 0.499 |
| 42 | EH | Emshörn                   | 2 | 8.194 | 8.354 | 1.918  | 1.707  | 24.3 | 3.334 |
| 43 | BK | Borkum-Südstrand          | 4 | 7.625 | 7.938 | 5.501  | 2.776  | 33.1 | 3.499 |
| 44 | BF | Borkum-Fischerbalje       | 2 | 7.632 | 7.875 | 2.916  | 3.646  | 17.8 | 3.835 |
| 45 | ND | Norderney-Riffgat         | 2 | 7.653 | 7.840 | 2.251  | 1.562  | 37.2 | .334  |
| 46 | SP | Spiekeroog                | 3 | 7.667 | 7.819 | 2.002  | 0.925  | 30.5 | 2.666 |
| 47 | WW | Wangerooge-West           | 3 | 8.479 | 8.604 | 1.831  | 1.572  | 26.7 | 0.665 |
| 48 | WN | Wangerooge-Nord           | 3 | 7.674 | 7.944 | 4.166  | 4.214  | 32.0 | 3.833 |
| 49 | MP | Mellumplate               | 6 | 7.688 | 8.229 | 10.999 | 8.314  | 27.5 | 3.667 |
| 50 | AW | Leuchtturm Alte Weser     | 2 | 7.174 | 7.514 | 4.082  | 15.663 | 23.1 | 3.833 |
| 51 | BZ | Bake Z                    | 3 | 7.701 | 8.021 | 5.498  | 2.677  | 29.6 | 3.667 |
| 52 | SN | Scharhörn                 | 4 | 7.708 | 8.042 | 6.082  | 3.078  | 31.5 | 3.502 |
| 53 | HE | Helgoland-Binnenhafen     | 2 | 7.681 | 7.840 | 1.915  | 1.051  | 23.5 | 3.499 |
| 54 | MG | Mittelgrund               | 4 | 7.715 | 8.097 | 6.833  | 4.681  | 28.6 | 3.667 |
| 55 | ZE | Zehnerloch                | 2 | 7.722 | 7.958 | 2.832  | 2.043  | 30.0 | 3.334 |
| 56 | HB | Hamburg-St. Pauli         | 3 | 7.382 | 7.875 | 8.002  | 10.287 | 61.1 | 3.168 |
| 57 | BU | Büsum                     | 2 | 8.306 | 8.431 | 1.500  | 0.800  | 24.8 | 2.498 |
| 58 | WI | Wittdün                   | 2 | 8.250 | 8.382 | 1.584  | 0.971  | 23.5 | 2.834 |
| 59 | HU | Husum                     | 3 | 7.042 | 7.549 | 8.167  | 15.761 | 42.4 | 3.833 |
| 60 | HR | Hörnum                    | 2 | 8.160 | 8.243 | 1.001  | 1.130  | 21.1 | 1.334 |
| 61 | HO | Højer                     | 2 | 8.125 | 8.201 | 0.917  | 0.775  | 25.8 | 1.334 |
| 62 | LS | List                      | 2 | 8.104 | 8.236 | 1.584  | 3.614  | 12.4 | 1.332 |
| 63 | HY | Havneby                   | 3 | 7.243 | 7.604 | 6.415  | 5.383  | 10.2 | 3.499 |
| 64 | BM | Ballum                    | 2 | 8.215 | 8.292 | 0.917  | 1.305  | 21.8 | 0.667 |
| 65 | RI | Ribe (Havet på forlandet) | 4 | 7.285 | 7.646 | 6.583  | 3.819  | 20.3 | 3.000 |
| 66 | EJ | Esbjerg                   | 2 | 7.958 | 8.083 | 1.500  | 2.988  | 11.4 | 1.500 |
| 67 | HV | Hvide Sande (Havet)       | 2 | 8.021 | 8.069 | 0.583  | 0.724  | 28.2 | 0.667 |
| 68 | TS | Thorsminde (Havn)         | 2 | 8.507 | 8.576 | 0.833  | 5.879  | 21.2 | 1.001 |
| 69 | TH | Thyborøn (Havet hofde 58) | 2 | 8.174 | 8.292 | 1.418  | 1.405  | 26.9 | 2.333 |
| 70 | HA | Hanstholm (Havn)          | 2 | 8.333 | 8.431 | 1.166  | 1.188  | 39.5 | 1.834 |
| 71 | HI | Hirtshals                 | 1 | 8.924 | 8.958 | ?      | ?      | 26.8 | 0.833 |
| 72 | SK | Skagen                    | 1 | 8.903 | 8.958 | ?      | ?      | 44.0 | 1.332 |
| 73 | TG | Tregde                    | 3 | 8.264 | 8.354 | 1.250  | 3.595  | 6.6  | 1.500 |
| 74 | SV | Stavanger                 | 5 | 7.931 | 8.757 | 16.166 | 45.148 | 11.8 | 3.331 |
| 75 | BG | Bergen                    | 5 | 7.785 | 8.236 | 8.918  | 3.401  | 10.9 | 3.502 |
| 76 | MY | Maløy                     | 2 | 8.667 | 8.715 | 0.583  | 0.368  | 8.3  | 0.665 |

Notes:

[1] Running index.

[2] Station abbreviation used in manuscript.

[3] Station name.

[4] Number of sequentially decreasing zero-crossing oscillations after and including the highest down-crossing oscillation during the two day period of Storm Tilo 8–9 November 2007.

[5] Starting time of oscillation sequence in days after 1 November 2007 00:00 GMT (i.e., the approximate middle of the storm period on 9 November 2007 00:00 GMT would appear as day 8.000 in this column)

[6] Ending time of oscillation sequence in days after 1 November 2007 00:00 GMT.

[7] Time span of the complete sequence of decreasing oscillations in hours.

[8] e-folding decay time of the decreasing oscillations in hours. There were two cases where the e-folding decay time could not be calculated because the highest oscillation during the 48 hour period occurred at the end of the time series on 8–9 November 2007.

[9] Trough-to-peak height of the highest down-crossing oscillation in centimetres.

[10] Zero-crossing period of the highest down-crossing oscillation in hours.

S6 Diagrams of diagnostics based on Fig. 5 of the main manuscript

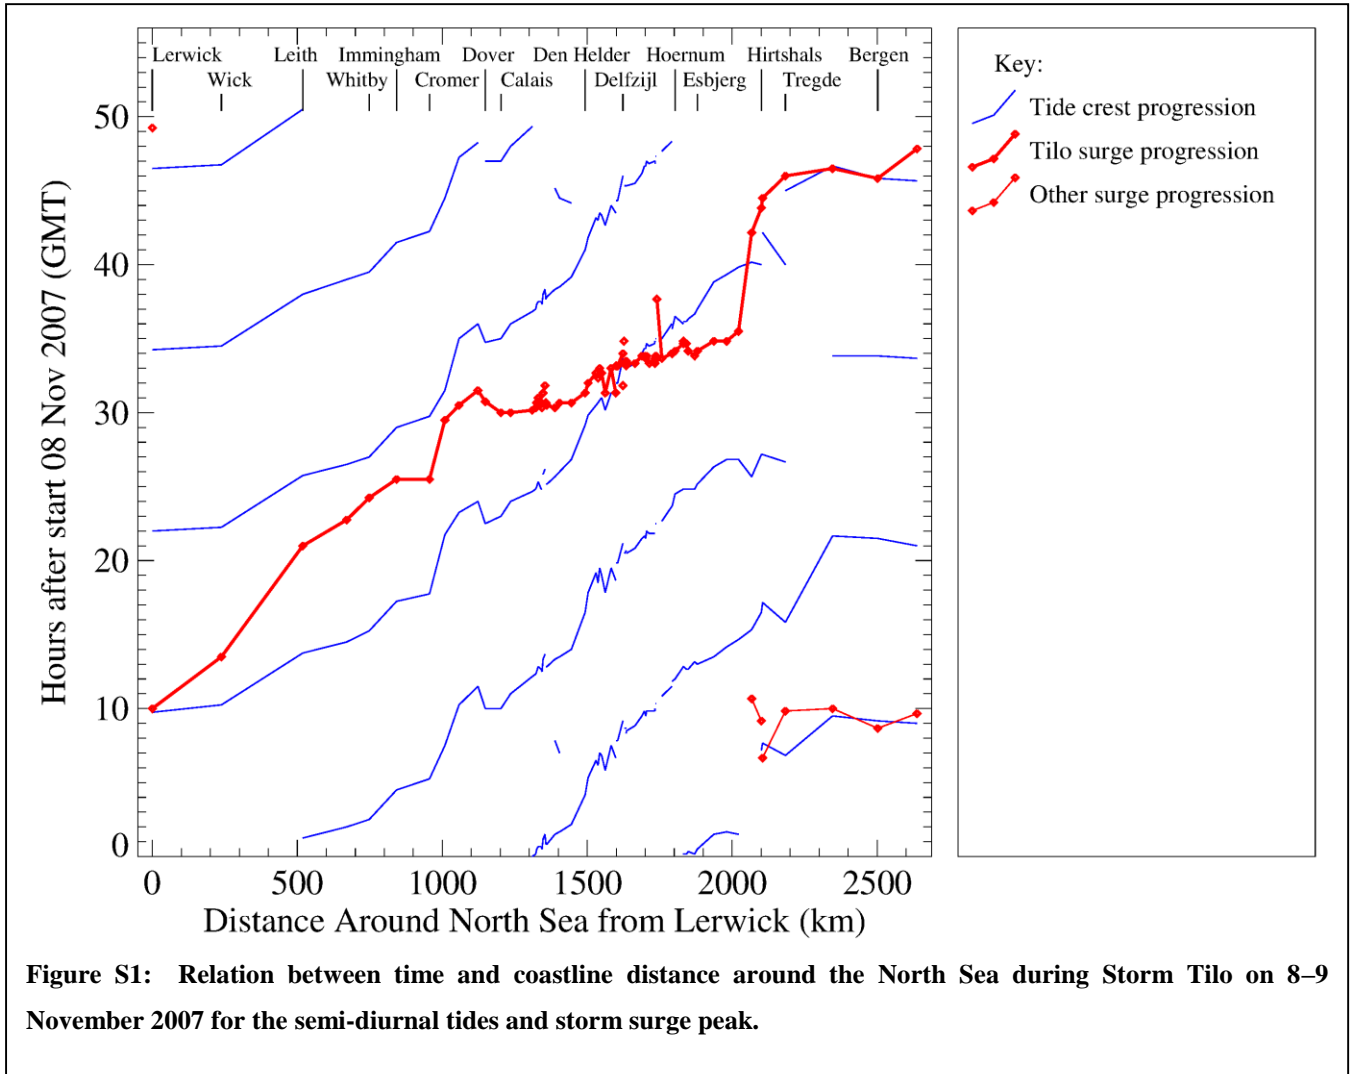

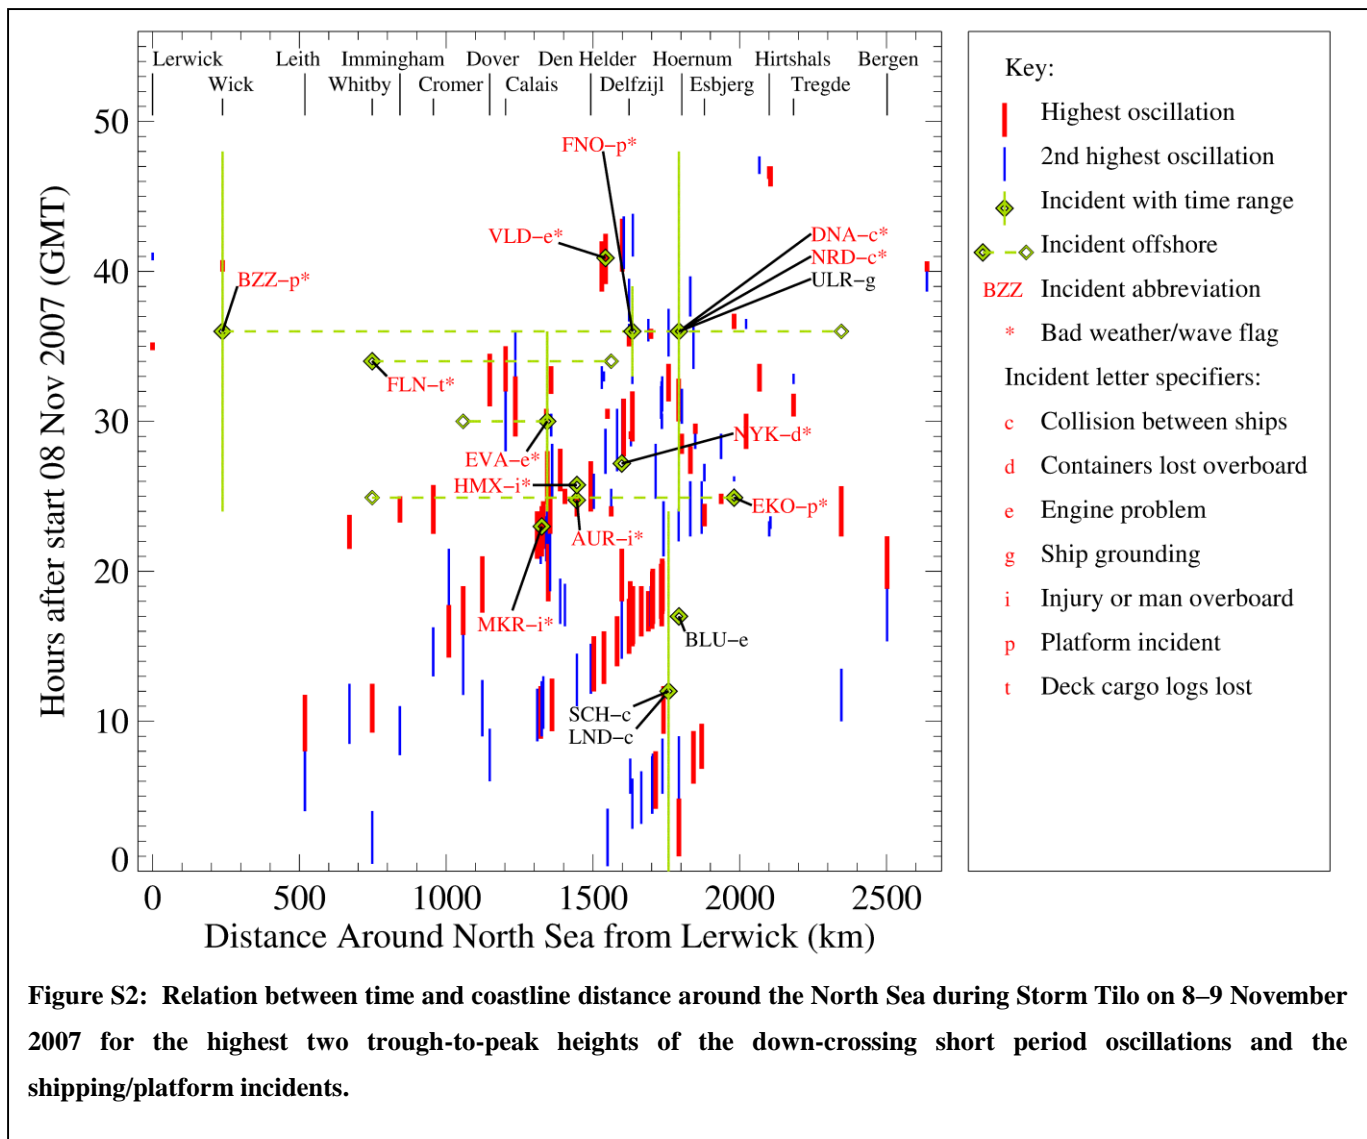

**Figure S2: Relation between time and coastline distance around the North Sea during Storm Tilo on 8–9 November 2007 for the highest two trough-to-peak heights of the down-crossing short period oscillations and the shipping/platform incidents.**



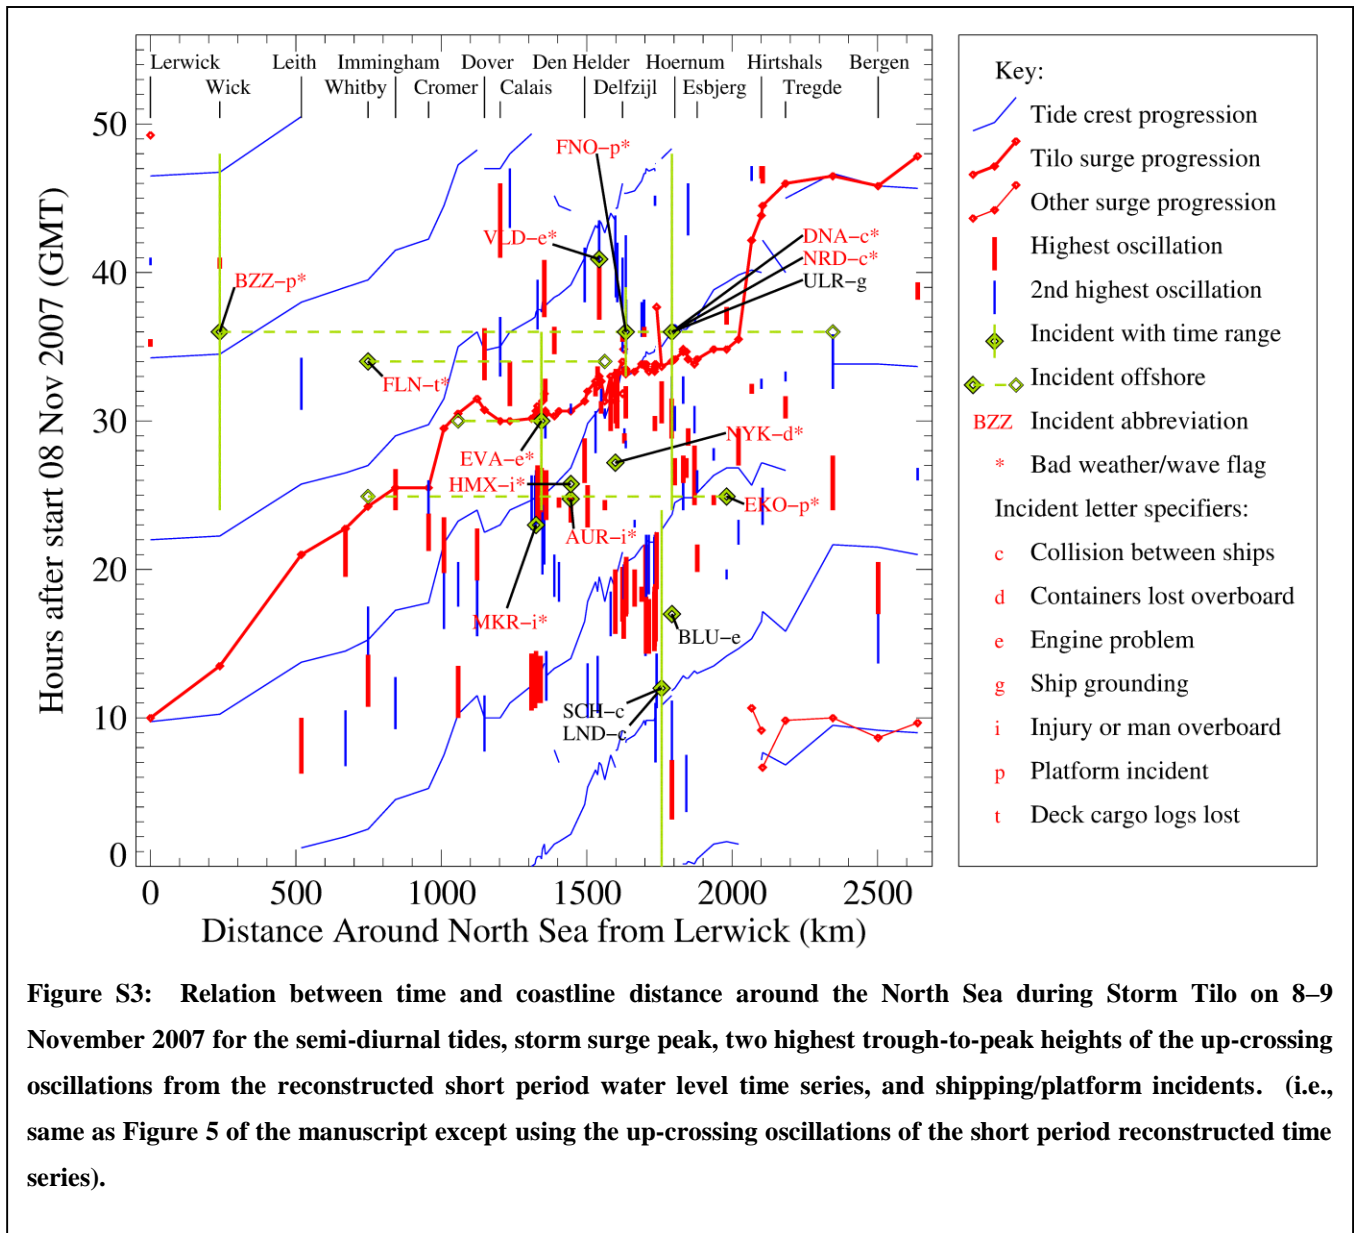

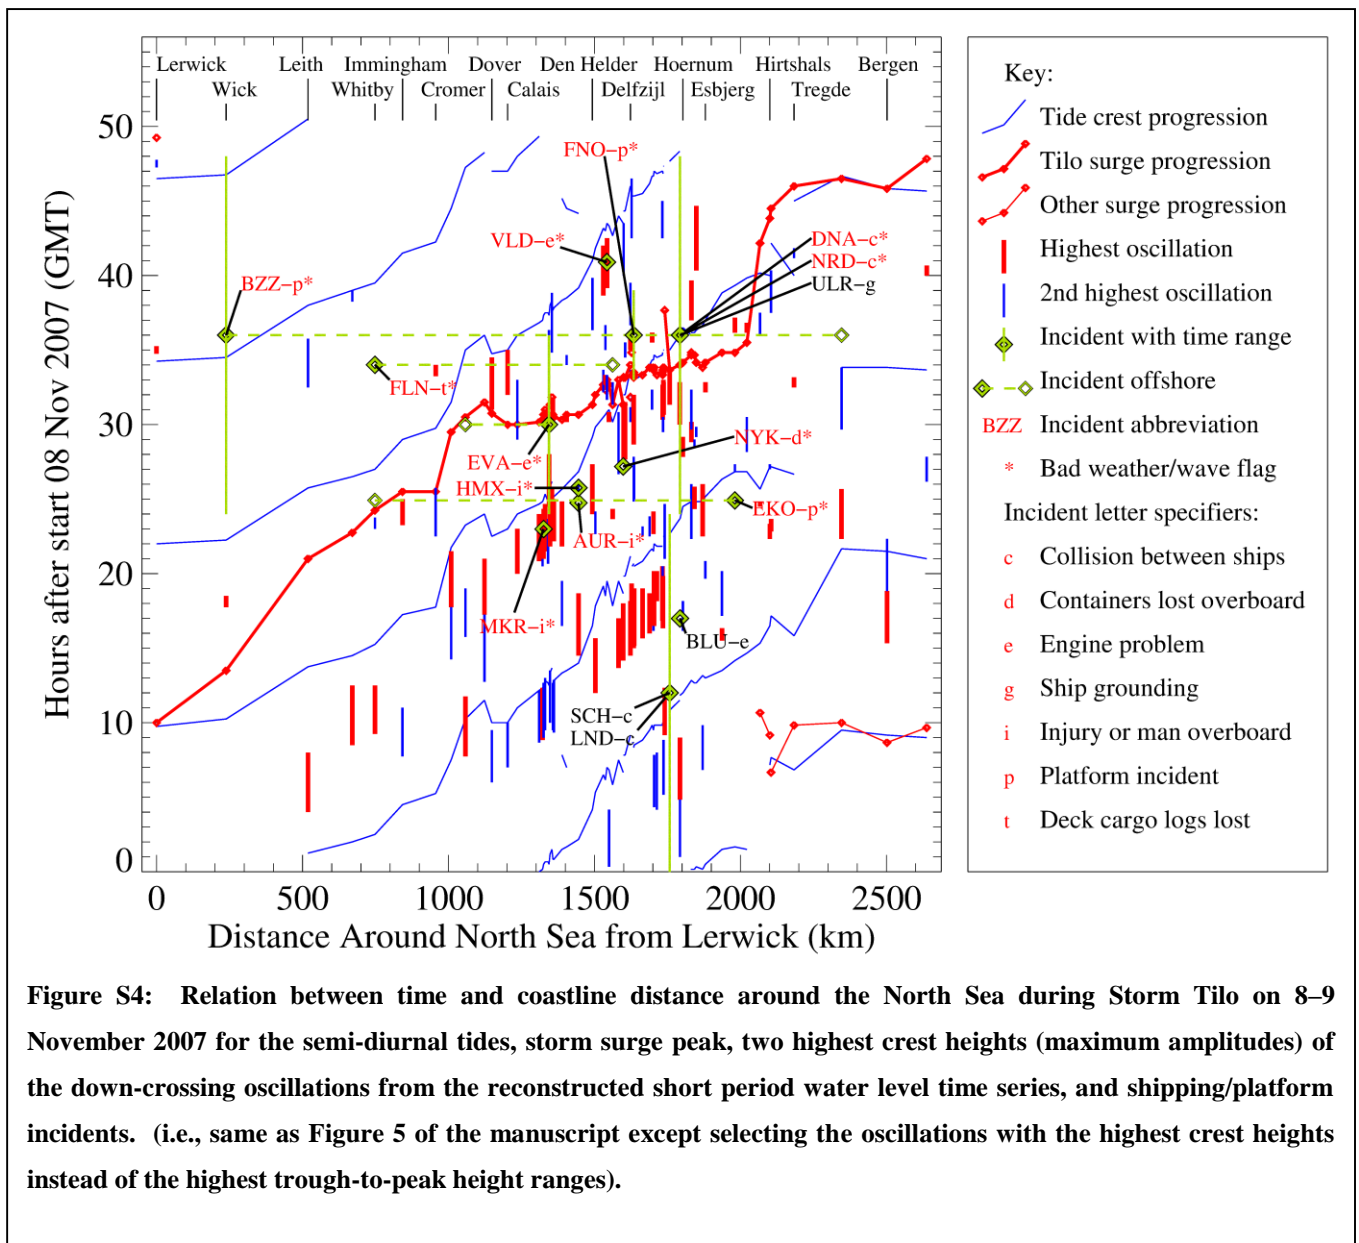

Figure S4: Relation between time and coastline distance around the North Sea during Storm Tilo on 8–9 November 2007 for the semi-diurnal tides, storm surge peak, two highest crest heights (maximum amplitudes) of the down-crossing oscillations from the reconstructed short period water level time series, and shipping/platform incidents. (i.e., same as Figure 5 of the manuscript except selecting the oscillations with the highest crest heights instead of the highest trough-to-peak height ranges).

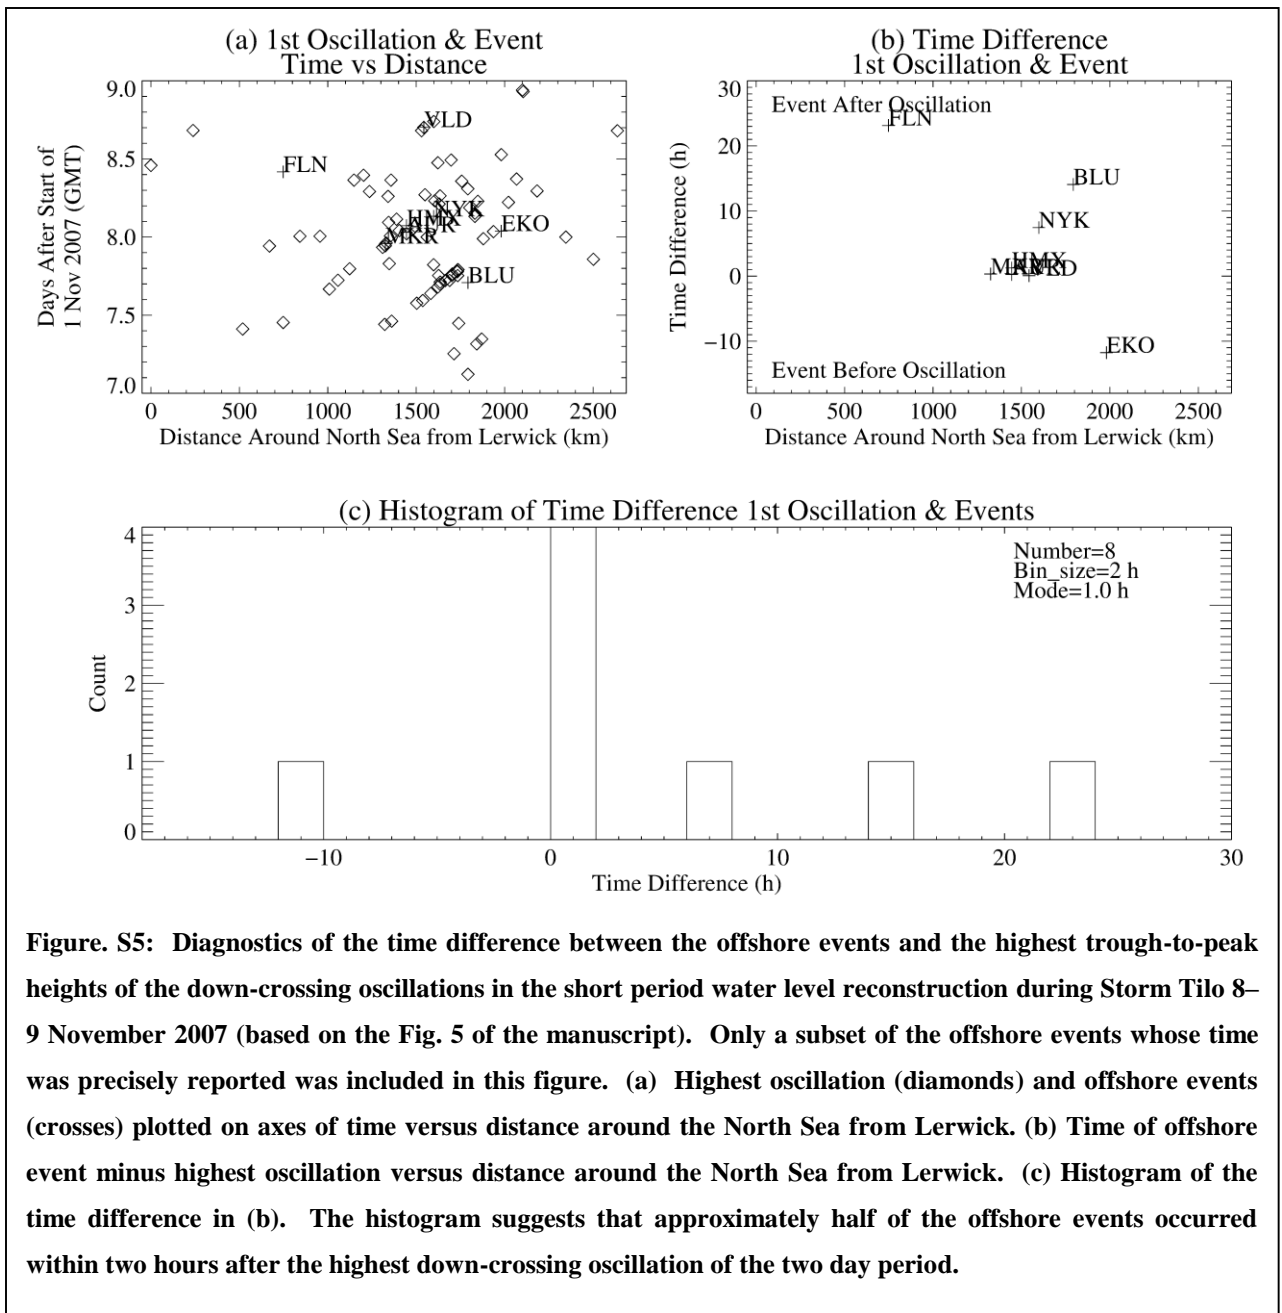

**S7 Diagrams to support the calculation of the e-folding decay time of the highest oscillation during Storm Tilo 8–9 November 2007.**

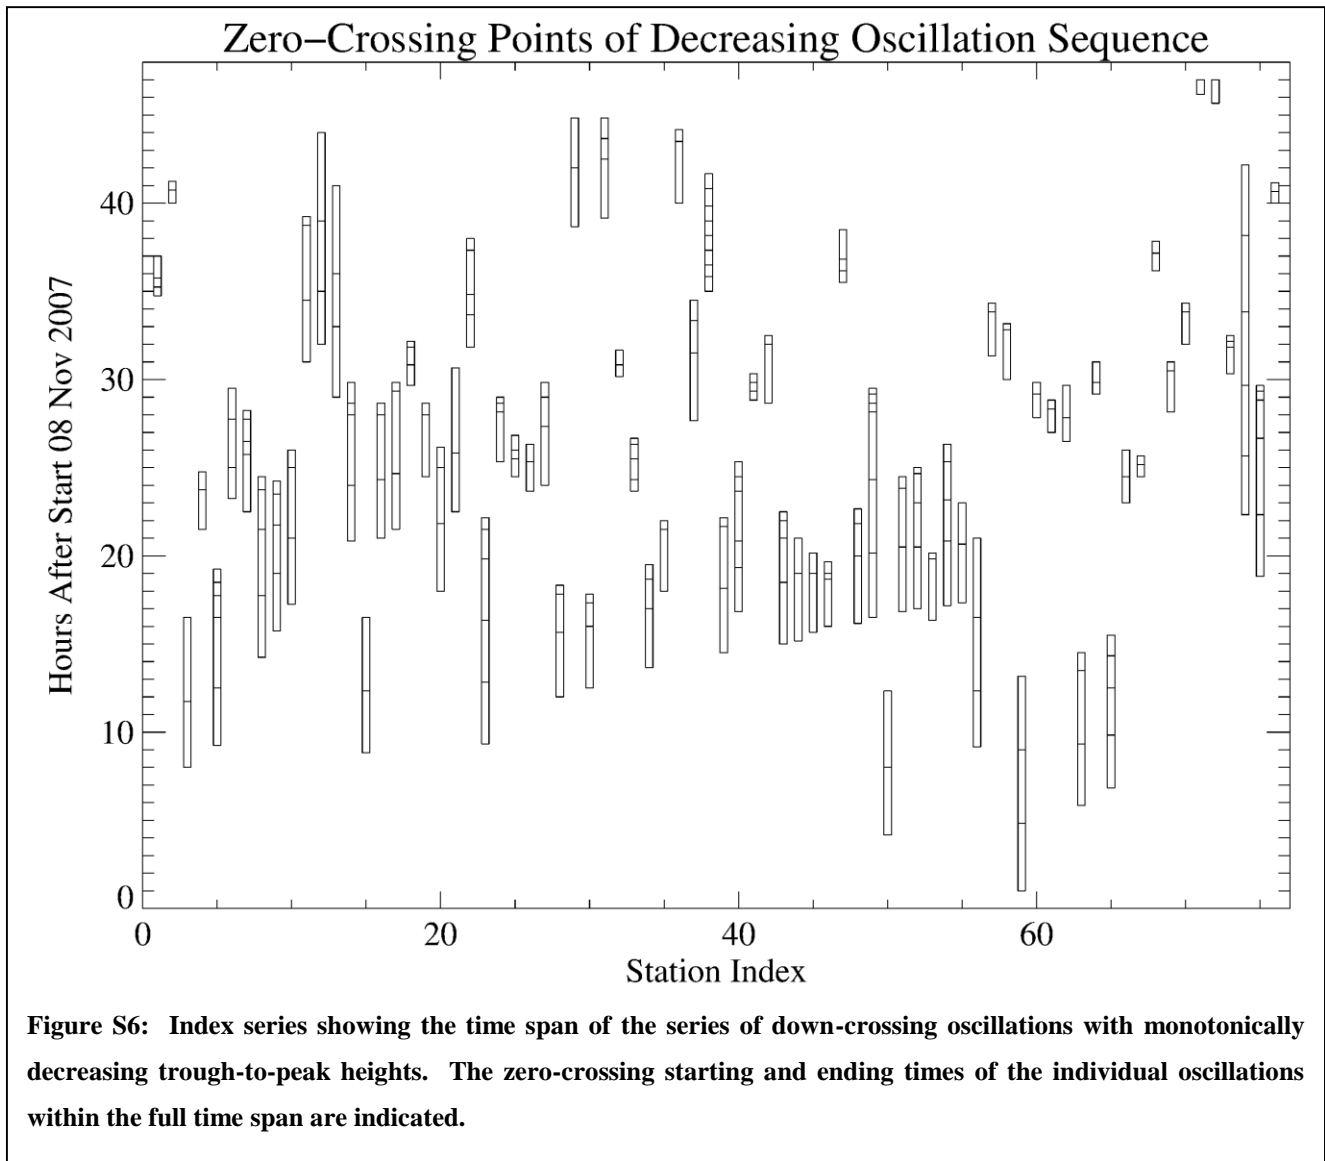

**Figure S6: Index series showing the time span of the series of down-crossing oscillations with monotonically decreasing trough-to-peak heights. The zero-crossing starting and ending times of the individual oscillations within the full time span are indicated.**

### e-Folding Decay Time of Highest Oscillation

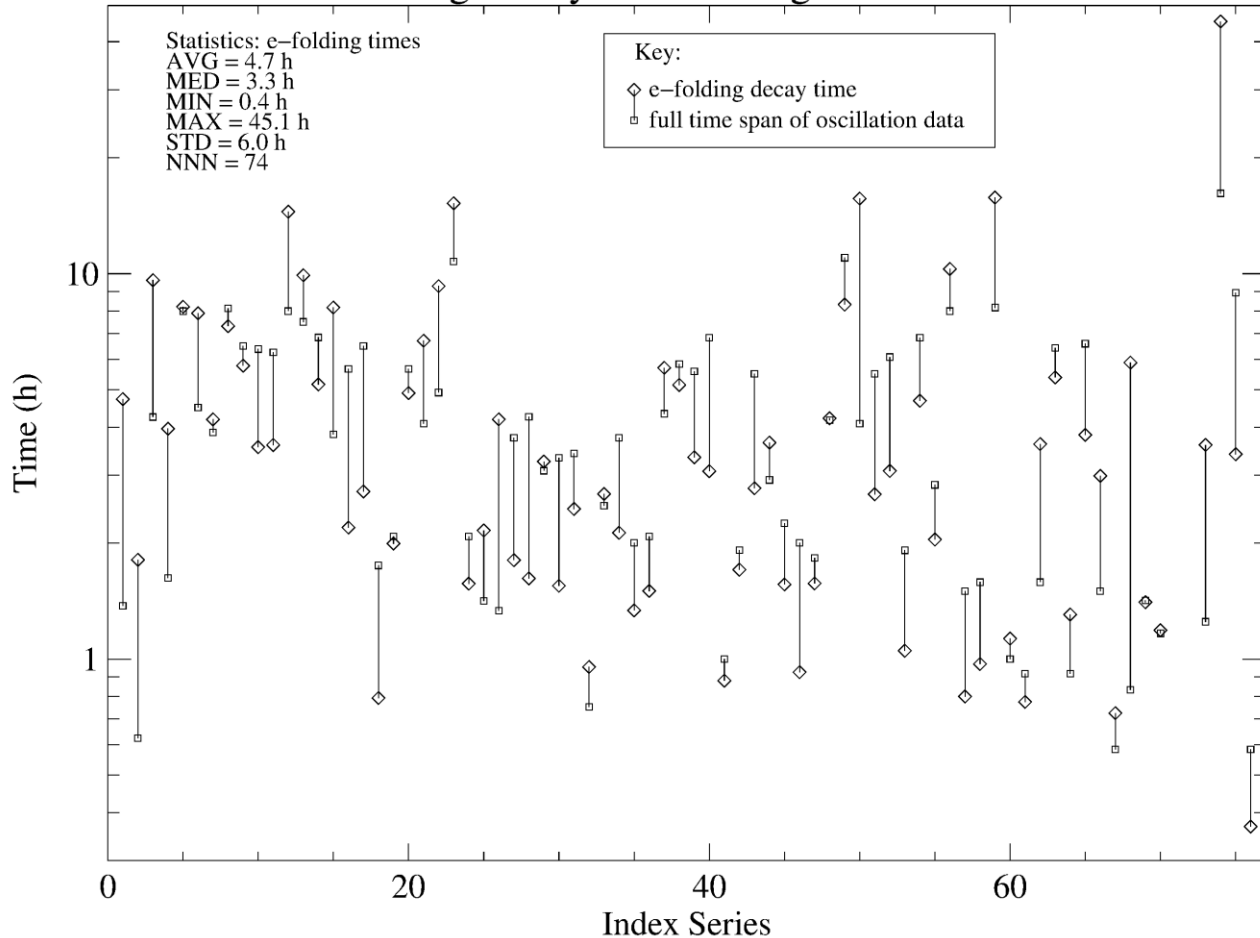

**Figure S7: Station index series of the e-folding decay times of the highest down-crossing short period oscillation in the data set of North Sea tide gauge stations during Storm Tilo on 8–9 November 2007. The calculated e-folding decay times is shown by diamonds. The full time span of the decreasing oscillations that is used in the calculation is indicated by a small square. The statistics of the calculated e-folding decay times for the subset of 74 stations with valid data is given in the top left hand corner (two stations were excluded because the highest oscillation occurred at the very end of the two day storm period).**

**S8 Diagrams giving an overview of meteorological conditions during Storm Tilo 8–9 November 2019  
(reproduced from the EGU 2019 ERE poster presentation)**

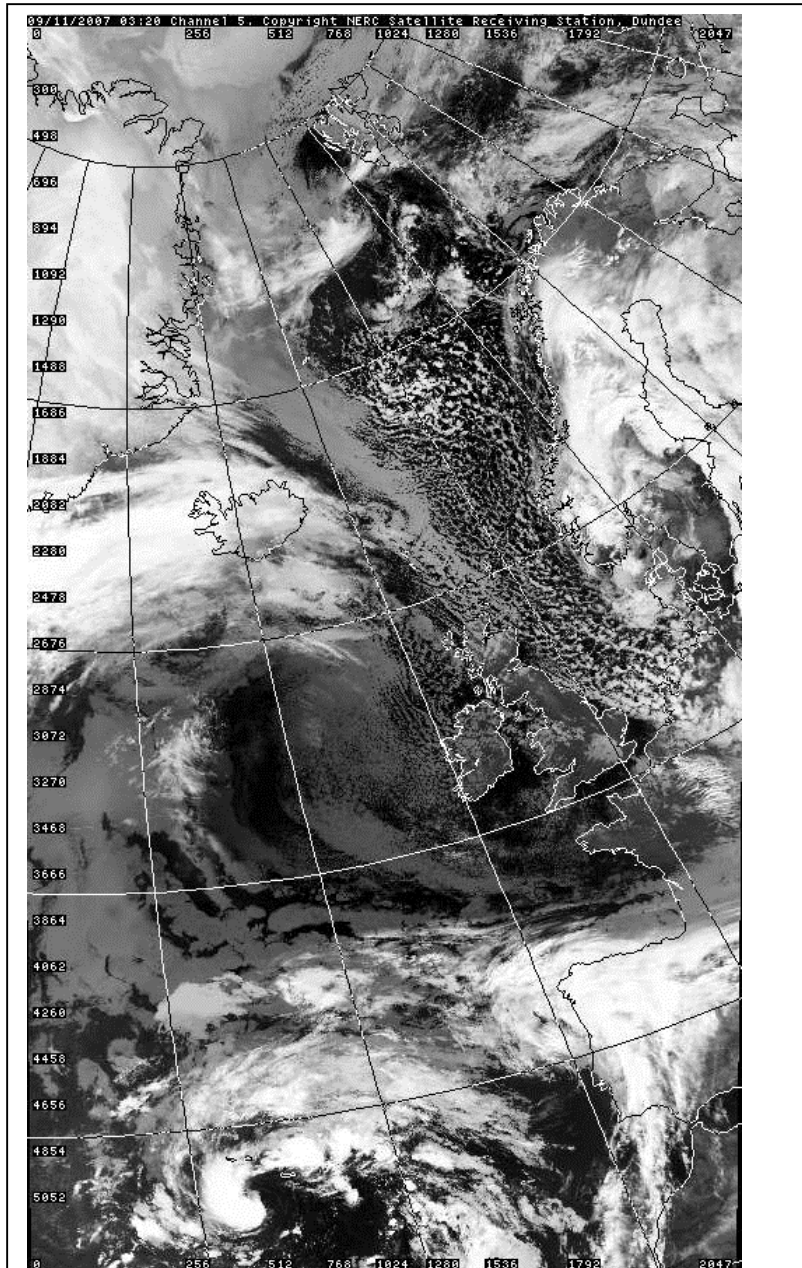

**Figure S8: AVHRR thermal infrared satellite image for 9 November 2007 03:20 GMT (<http://www.sat.dundee.ac.uk>). The picture highlights the open cell convective cloud structure over the North Sea that is associated with a cold air outbreak and strong north winds behind the eastward moving low pressure centre.**

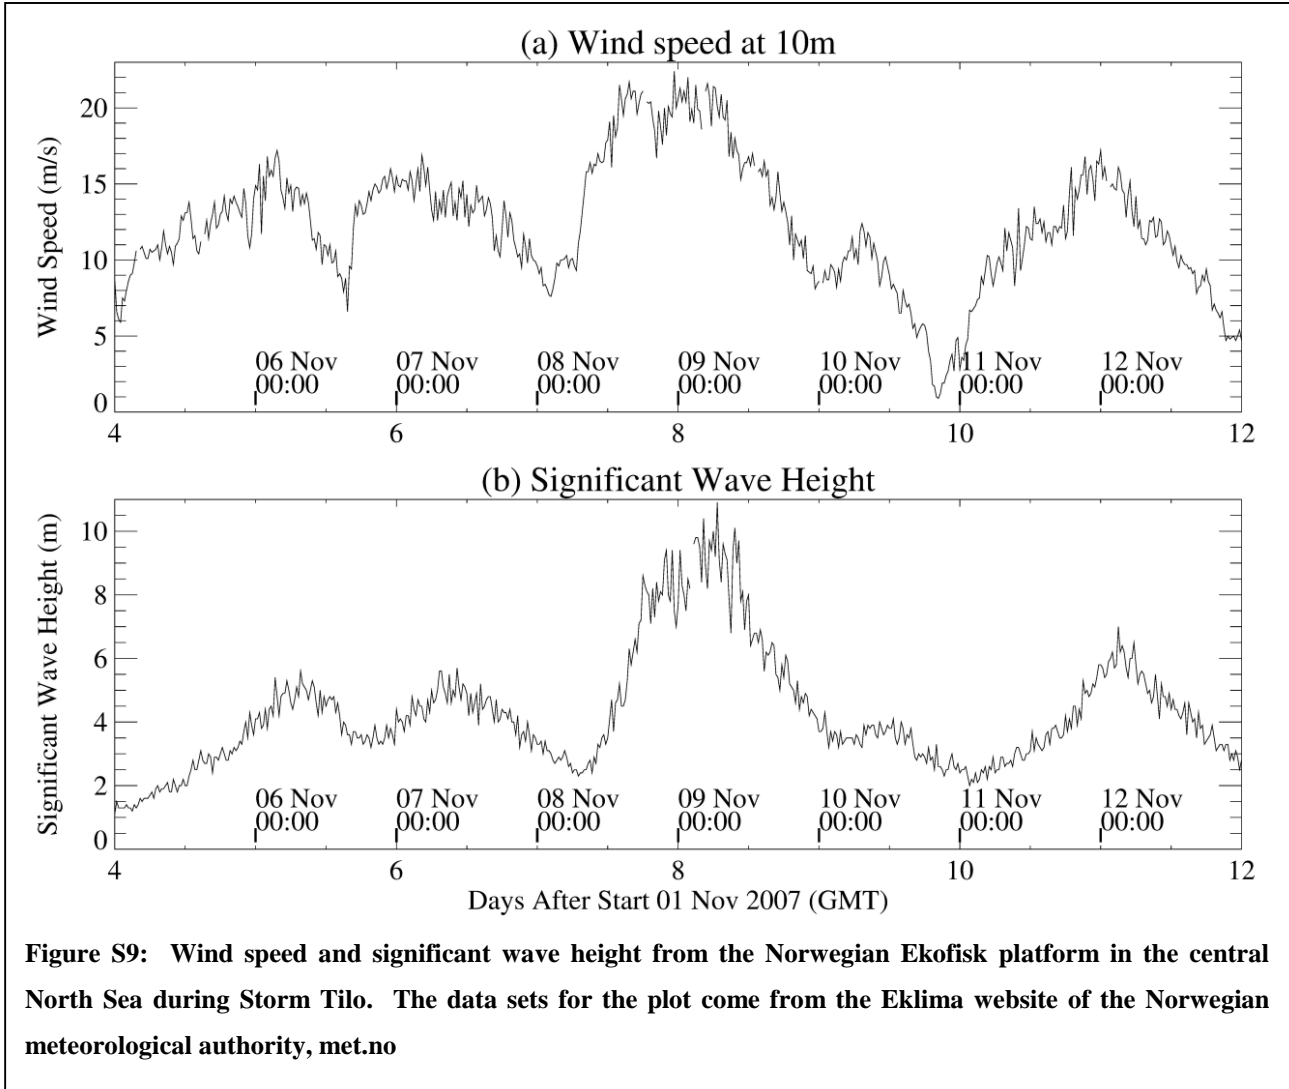

**Figure S9: Wind speed and significant wave height from the Norwegian Ekofisk platform in the central North Sea during Storm Tilo. The data sets for the plot come from the Eklima website of the Norwegian meteorological authority, met.no**

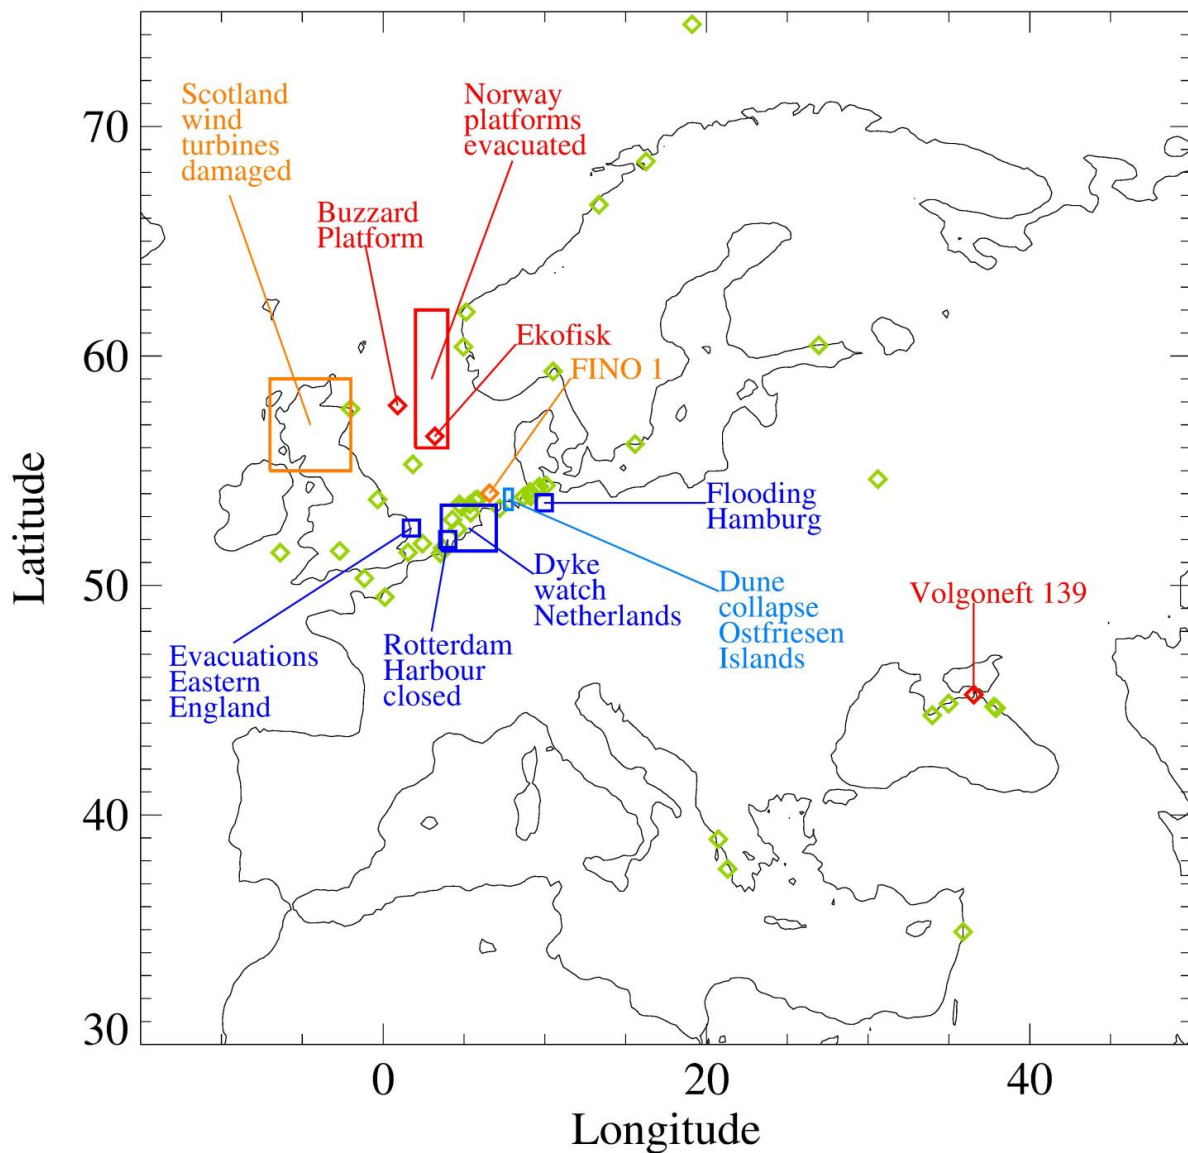

**Figure S10: Schematic map of events and infrastructure impacts for Storm Tilo 8–9 November 2007. Note that Storm Tilo produced a secondary storm in the eastern Mediterranean Sea and Black Sea that caused a number of ship sinkings and emergencies on 11 November 2007 (green diamonds).**



**S9 Time series of the original water level data and different frequency band components**

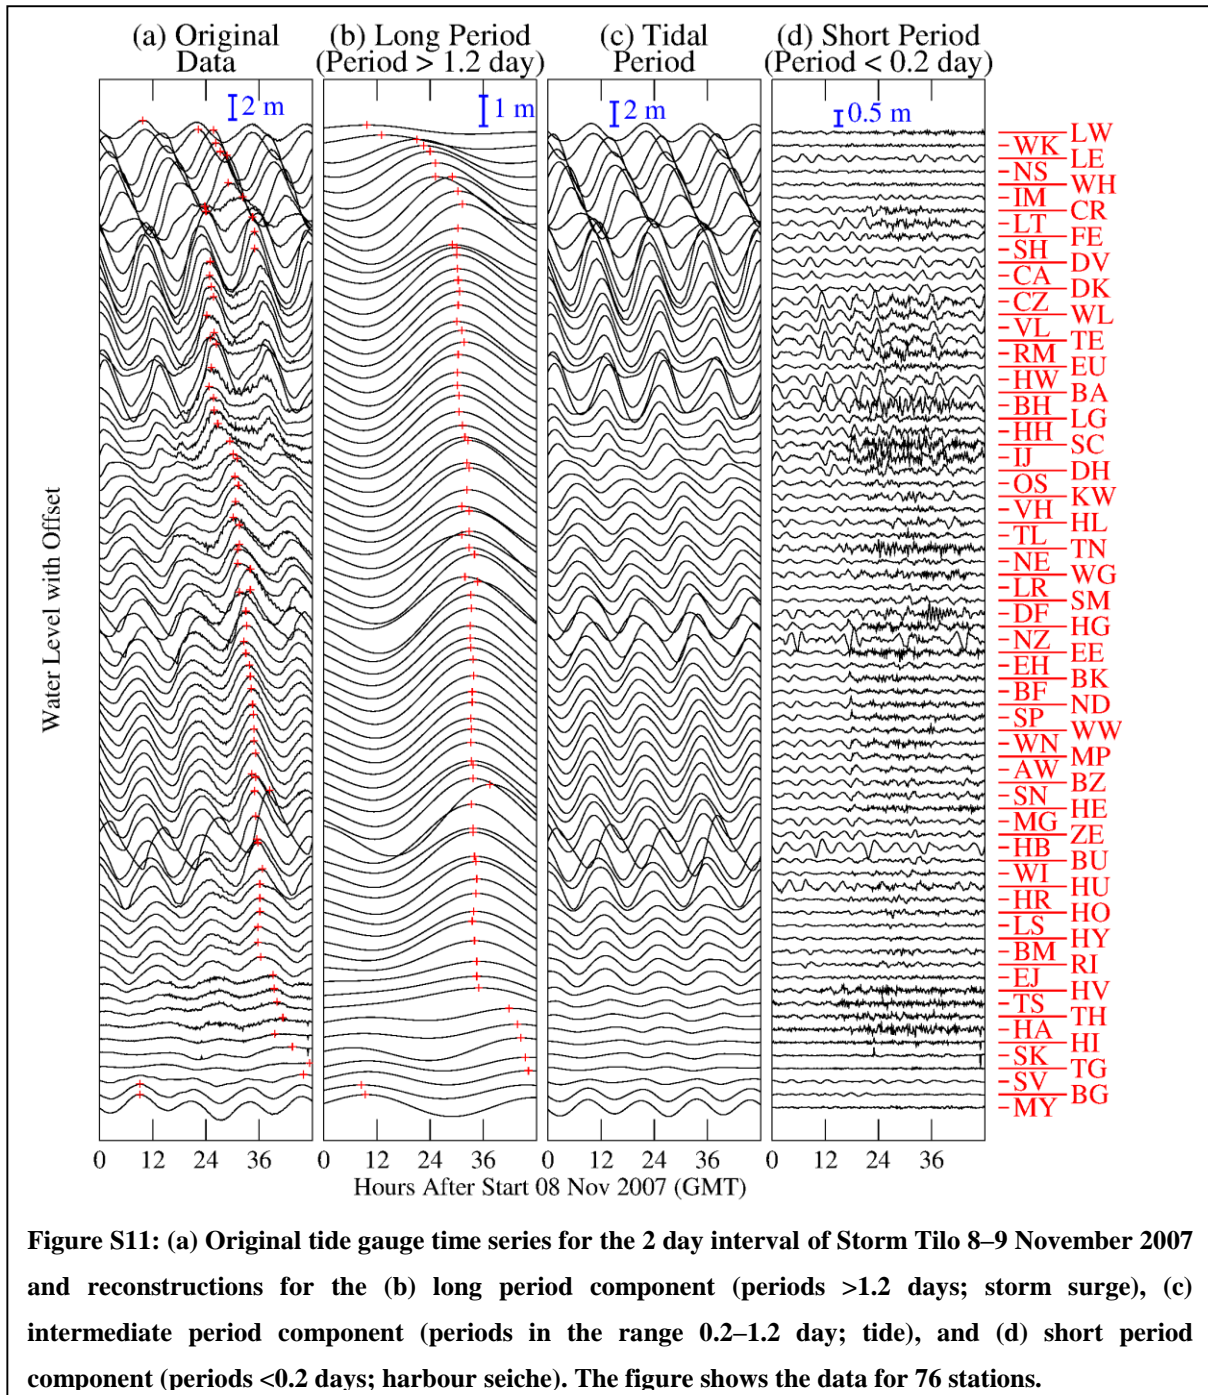

**Figure S11: (a) Original tide gauge time series for the 2 day interval of Storm Tilo 8–9 November 2007 and reconstructions for the (b) long period component (periods >1.2 days; storm surge), (c) intermediate period component (periods in the range 0.2–1.2 day; tide), and (d) short period component (periods <0.2 days; harbour seiche). The figure shows the data for 76 stations.**

S10 Diagrams of the tide gauge station and event locations

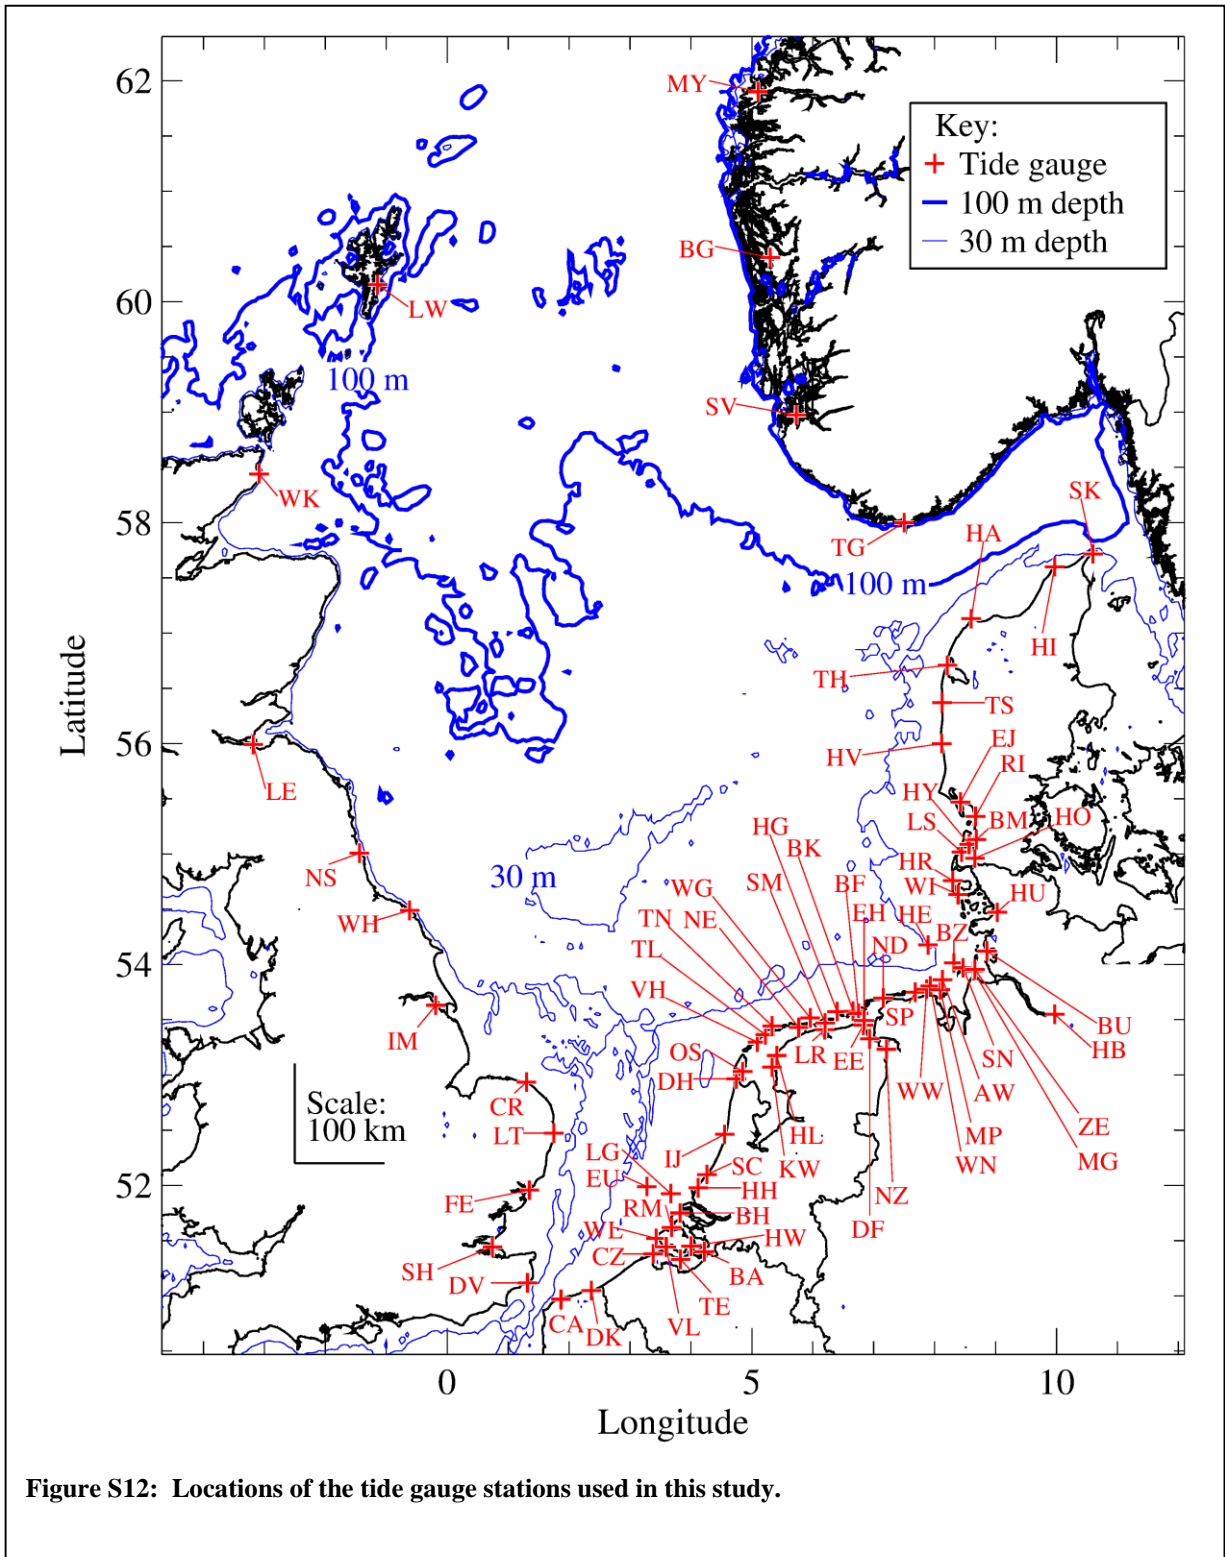

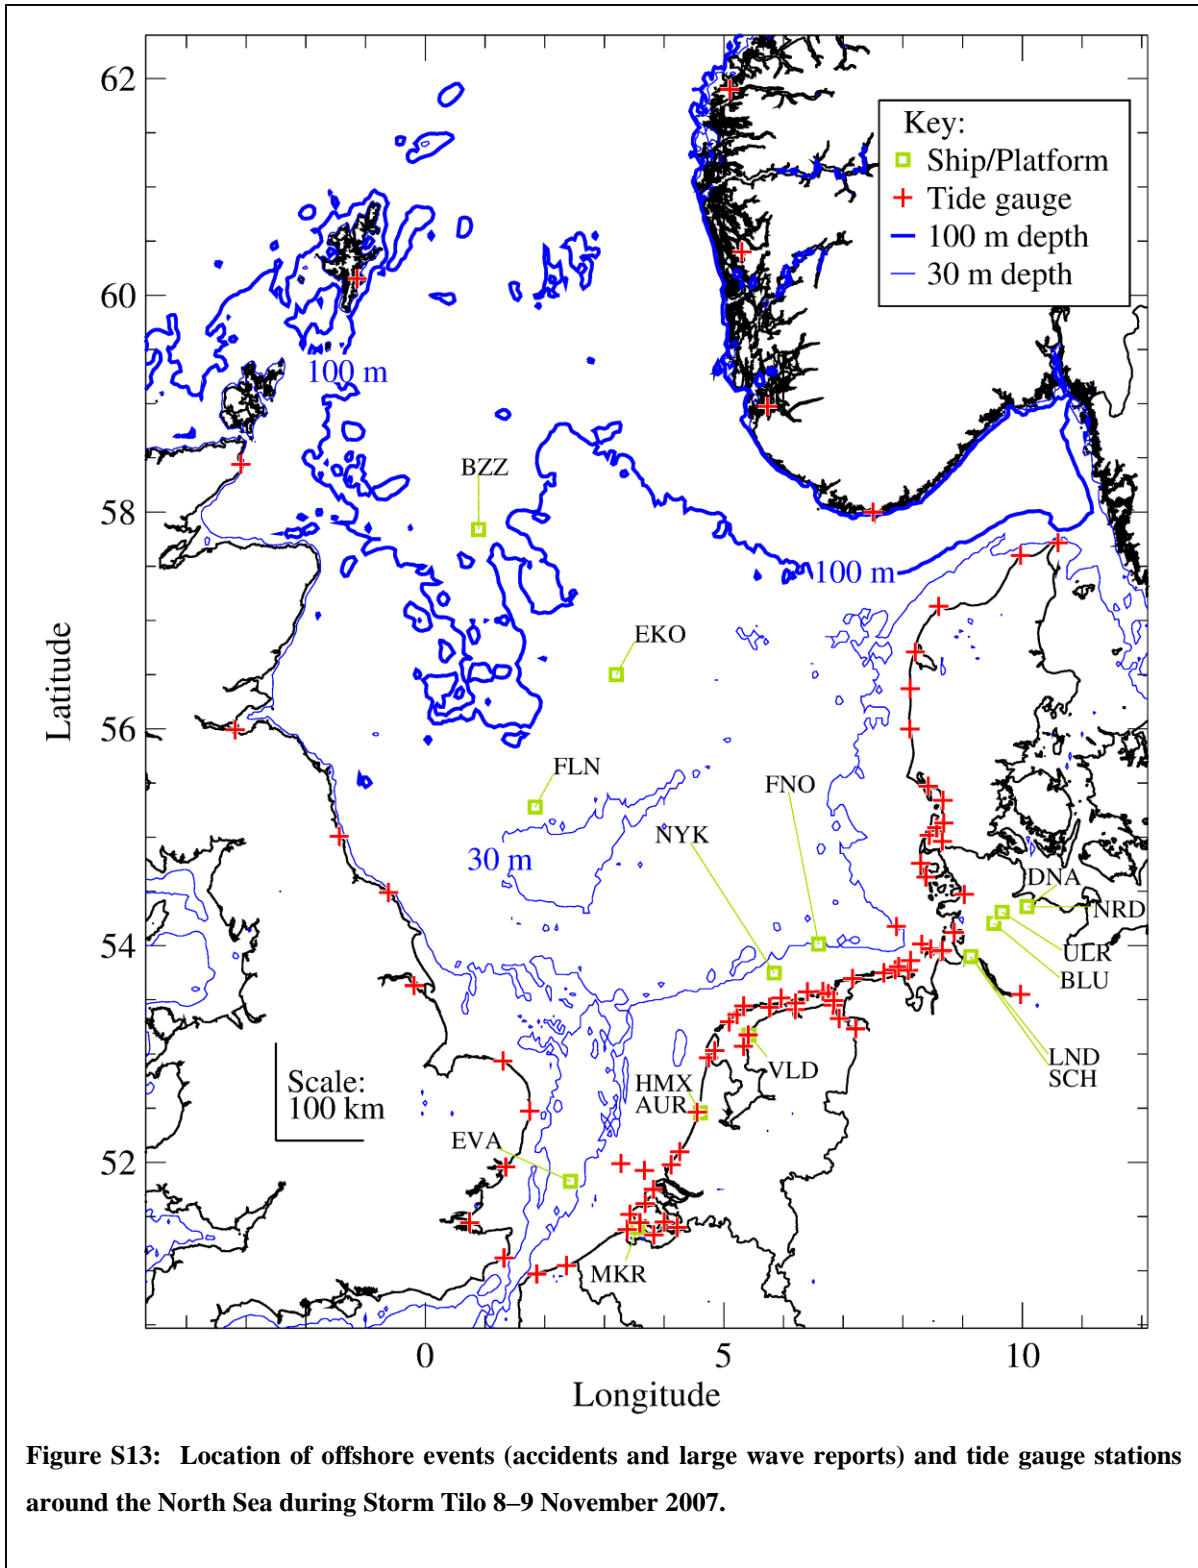

**Figure S13: Location of offshore events (accidents and large wave reports) and tide gauge stations around the North Sea during Storm Tilo 8–9 November 2007.**

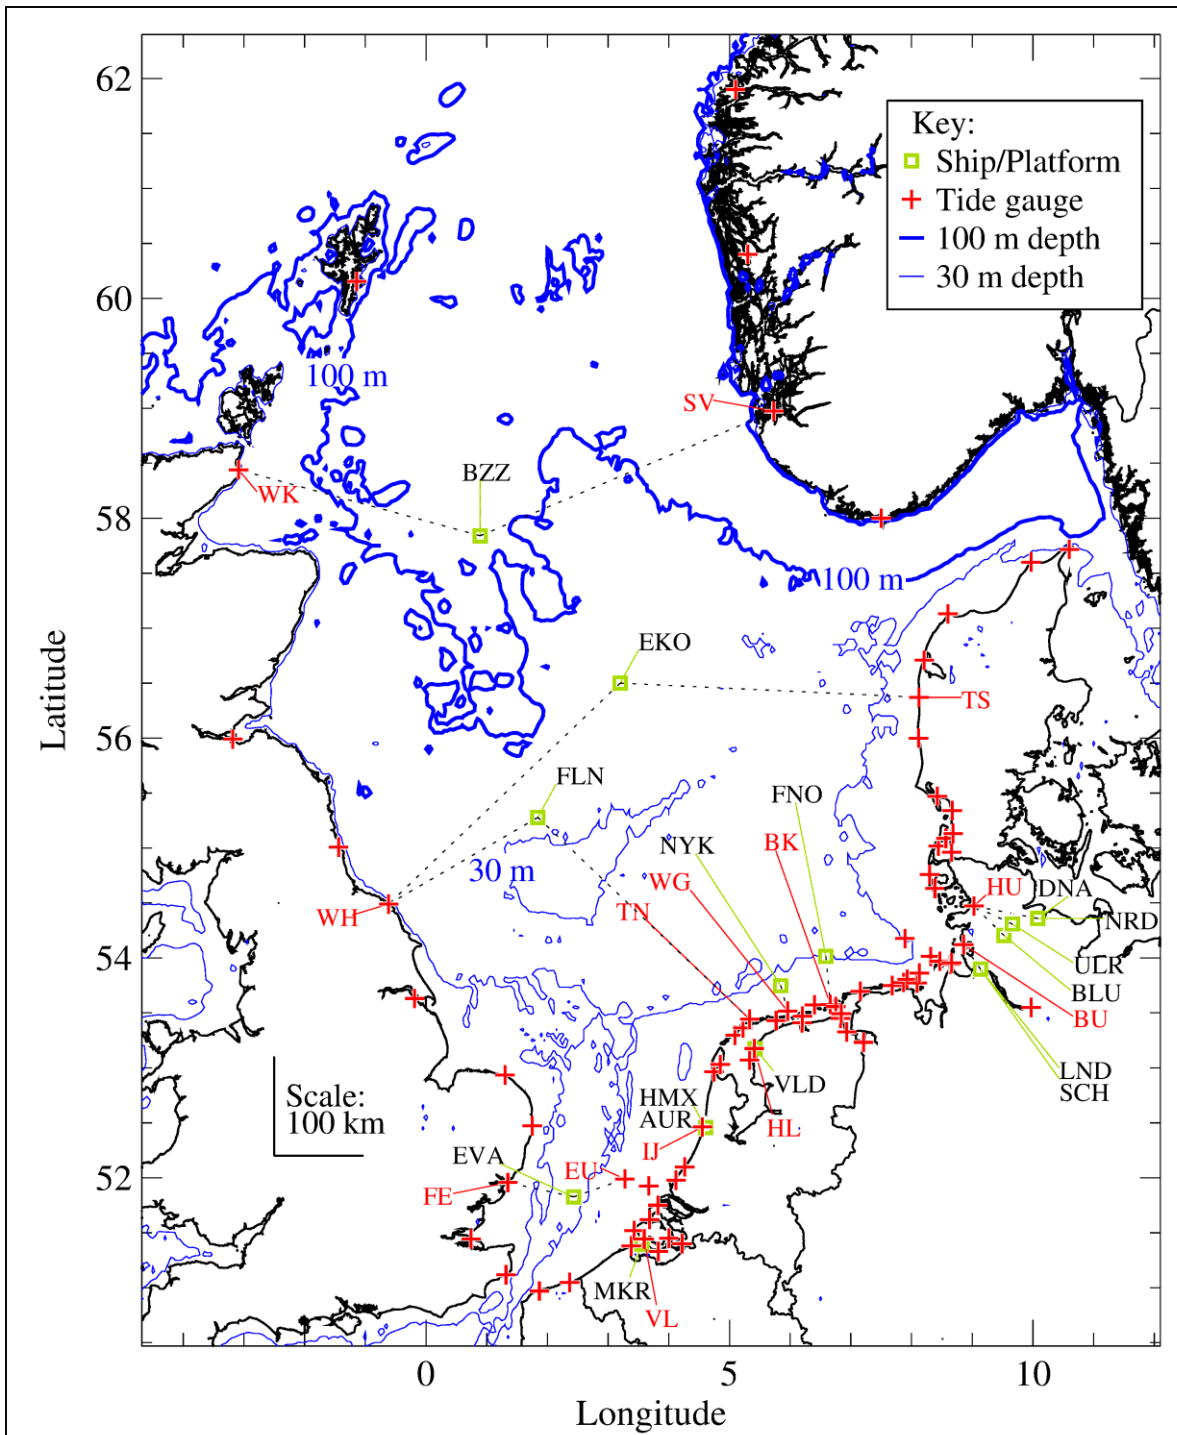

**Figure S14: Location of offshore events (accidents and large wave reports) and the nearest tide gauge stations for Storm Tilo on 8–9 November 2007. For four offshore events far offshore (BZZ, EKO, FLN, and AUR) the closest tide gauge stations on eastern and western sides of the North Sea are indicated with dotted black lines.**

## S11 Tabulated working notes for literature survey

Table S6. Master list of tables in working notes

| Table | Content                                                                                                               |
|-------|-----------------------------------------------------------------------------------------------------------------------|
| S1    | Master list of tables in working notes                                                                                |
| S2    | List of sources reviewed for project                                                                                  |
| S3    | List of normal photos of Tilo/Andrea event                                                                            |
| S4    | Ranking of Tilo/Andrea among recent storms; assessing importance of storm                                             |
| S5    | Storm Tilo/Andrea: severe forecast                                                                                    |
| S6    | Storm Tilo/Andrea: not as bad as expected                                                                             |
| S7    | Storm Tilo/Andrea: extended period bad weather                                                                        |
| S8    | Names of the storm                                                                                                    |
| S9    | Storm Tilo/Andrea: satellite pictures and weather maps                                                                |
| S10   | Storm Tilo/Andrea: list meteorological data                                                                           |
| S11   | Storm Tilo/Andrea: significant wave height and sea state                                                              |
| S12   | Storm Tilo/Andrea: storm trajectory map                                                                               |
| S13   | Storm Tilo/Andrea: coastal flooding and evacuations                                                                   |
| S14   | Storm Tilo/Andrea: surge reports and quantitative water levels                                                        |
| S15   | Storm Tilo/Andrea: surge barrier closures                                                                             |
| S16   | Storm Tilo/Andrea: beach damage                                                                                       |
| S17   | Storm Tilo/Andrea: list bridge closures, cancelled ferry crossings, port closures, airport cancel, rail interruptions |
| S18   | Storm Tilo/Andrea: structural damage to wind farms & buildings                                                        |
| S19   | Storm Tilo/Andrea: general ship/rig emergency reports/offshore incidents/platform evacuations                         |
| S20   | Storm Tilo/Andrea: instrument failures during storm                                                                   |
| S21   | Storm Tilo/Andrea: model results and fields                                                                           |
| S22   | Storm Tilo/Andrea: climatological background of storm                                                                 |

Table S7. List of sources reviewed for project (arranged by year and then alphabetically)

| Source                     | Type <sup>1</sup> | Full Reference and Notes                                                                                                                                                                                                                                                    |
|----------------------------|-------------------|-----------------------------------------------------------------------------------------------------------------------------------------------------------------------------------------------------------------------------------------------------------------------------|
| Environment Agency (2006)  | 4                 | Environment Agency, Somerset and the sea, The 1981 storm - 25 years on, Environment Agency, Manley House, Kestrel Way, Exeter, Devon, EX2 7LQ, 2006                                                                                                                         |
| Aftenposten 20071106       | 1                 | Aftenposten, Ekofisk og Valhall evakueres for stormen.1500 ansatte pa oljefeltene kofisk og Valhall i Nordsjoen kan bli evakuerte for den forventede storm Andrea natt til fredag. 06Nov2007 13:35                                                                          |
| Aftenposten 20071109       | 1                 | Aftenposten 20071109, Stormen kan vaere rester av orkanen Noel. Noel forsterket seg igjen over Atlantikhavet og besøkte Norge. Nina Loedemel, 09Nov2007, 1432local                                                                                                          |
| BBC (20071109a)            | 1                 | BBC, North Sea flood tide fears recede, Fri 09 November 2007, 1033GMT                                                                                                                                                                                                       |
| BBC (20071109b)            | 1                 | BBC, Thousands go home after tide fear, Friday 9 November, 16:50GMT                                                                                                                                                                                                         |
| Bergens Tidende (20071109) | 1                 | Bergens Tidende, Bolgehøyder opp mot 18 meter. Stormen som kommer inn til kysten i kveld kan bli en av arets toffeste, 08 Nov 2007 15:51 (contributor Leif Gullstein)                                                                                                       |
| Bradshaw (2007)            | 3                 | Bradshaw, Elizabeth (ed), Annual Report for 2007 for the UK National Tide Gauge Network and Related Sea Level Science, National Tide and Sea Level Facility, NERC 100017897 2007                                                                                            |
| Cargolaw (2007)            | 3                 | Cargolaw, International vessel casualties & pirates database for year 2007 – Jan. through Dec. 2007, <a href="http://www.cargolaw.com/presentation_casualties.07.html">http://www.cargolaw.com/presentation_casualties.07.html</a> , downloaded from the Internet 14Sep2018 |

|                               |   |                                                                                                                                                                                                                                                                                                                                                                                                                                                                                                                                                    |
|-------------------------------|---|----------------------------------------------------------------------------------------------------------------------------------------------------------------------------------------------------------------------------------------------------------------------------------------------------------------------------------------------------------------------------------------------------------------------------------------------------------------------------------------------------------------------------------------------------|
| Guardian (2007)               | 1 | The Guardian, Environmental disaster as Russian tanker sinks, Mon, 2007/11/12, 09:18 GMT (reporter: Luke Harding, Moscow)                                                                                                                                                                                                                                                                                                                                                                                                                          |
| Heyken (2007)                 | 1 | Heyken, Herma, Schwere Sturmflut an niedersächsischer Nordseeküste - Dunnenabbrüche auf den Inseln, 09/11/2007, NLWKN Niedersächsischer Landesbetrieb fuer Wasserwirtschaft, Kuesten- und Naturschutz.                                                                                                                                                                                                                                                                                                                                             |
| Horsburgh (2007)              | 3 | Horsburgh, Kevin, Foreword, in Bradshaw, Elizabeth (ed), Annual Report for 2007 for the UK National Tide Gauge Network and Related Sea Level Science, National Tide and Sea Level Facility, NERC 100017897 2007, p.2                                                                                                                                                                                                                                                                                                                               |
| KIT20071117                   | 1 | KIT20071117, Sturm, Schnee, Regen. Mitteleuropa/Schwarzes Meer 09.-13.11.2007 (text CE), Karlsruhe Institute of Technology, Wettergefahren-Fruehwarnung, Institut fuer Meteorologie und Klimaforschung, Samstag, 17.November 2007, 18:00MEZ                                                                                                                                                                                                                                                                                                        |
| Kustwachtcentrum (2007/11/06) | 1 | Kustwachtcentrum Den Helder, Containers verloren, Persberich 06Nov2007, emailed from Edwin Granneman 08Oct2008                                                                                                                                                                                                                                                                                                                                                                                                                                     |
| Kustwachtcentrum (2007/11/09) | 1 | Kustwachtcentrum, Persbericht, Noordwester storm, Info nr.1, 09Nov/2007                                                                                                                                                                                                                                                                                                                                                                                                                                                                            |
| Kustwachcentrum (2007/11/09)  | 1 | Kustwachtcentrum, Persbericht, Zoektocht naar verloren containers, info nr.1, 22Nov2007 1330                                                                                                                                                                                                                                                                                                                                                                                                                                                       |
| LCW(20071123)                 | 3 | Lloyd's Casualty Week, Weather and Navigation, pp17-20, Nov23/2007                                                                                                                                                                                                                                                                                                                                                                                                                                                                                 |
| Met Eireann (2007)            | 3 | Met Eireann, Monthly Weather Bulletin, No.259, November 2007<br>-half page report with 2 weather maps, 2 satellite images; separate page for buoys                                                                                                                                                                                                                                                                                                                                                                                                 |
| Met Office (2007)             | 3 | Met Office, 2007. Daily Weather Summary, November 2007                                                                                                                                                                                                                                                                                                                                                                                                                                                                                             |
| MIROS-Ekofisk (2007)          | 3 | MIROS, Ekofisk Monthly Report, November 2007. Doc No. ND/1024/07/11, Project: 1024-800 Ekofisk Met-Ocean Data Recording, Classification Open. Date 19December2007, prepared by AKS                                                                                                                                                                                                                                                                                                                                                                 |
| North Norfolk News (2007)     | 1 | North Norfolk News, Surge floods prompt new erosion fears, 14 November 2007, 01:00, Happisburgh Village Website, <a href="http://www.happisburgh.org.uk/press/nnn141107.html">http://www.happisburgh.org.uk/press/nnn141107.html</a>                                                                                                                                                                                                                                                                                                               |
| PON (2007)                    | 3 | PON_1_2007_data (MS Excel spreadsheet, 'published on 12/03/2013'), hyperlink access from: <a href="https://www.gov.uk/guidance/oil-and-gas-environmental-alerts-and-incident-reporting">https://www.gov.uk/guidance/oil-and-gas-environmental-alerts-and-incident-reporting</a> . Oil and gas: environmental alerts and incident reporting including anonymous reporting. (spreadsheet downloaded 14Sep2018, document timestamp 15Jun2012)<br>-spreadsheet with 7 cases offshore leakages from 06–11 Nov 2007; 2 cases ascribed to severe weather) |
| RWS (2007)                    | 1 | RWS, Verslag van de Stormvloed van 9 november 2007 (SR88), Ministerie van Verkeer en Waterstaat, Direktorat-Generaal Rijkswaterstaat Waterdienst, Stormvloedwaarschuwingsdienst/SVSD, Postbus 17, 8200 AA Lelystad <a href="http://www.svsd.nl">www.svsd.nl</a> , Lelystad, november 2007, 45pp                                                                                                                                                                                                                                                    |
| Tagesspiegel (2007)           | 1 | Der Tagesspiegel, Orkan 'Tilo'. Duenenabbruch kostet Helgoland Millionen, 09/11/2007, 16:55 (mit AFP/ddp)                                                                                                                                                                                                                                                                                                                                                                                                                                          |
| Telegraph (20071111)          | 1 | The Telegraph, Ecological disaster feared after tanker sinks, (contributor: Paul Eccleston) (11Nov2007)                                                                                                                                                                                                                                                                                                                                                                                                                                            |
| Unwetterzentrale (2007)       | 1 | Unwetterzentrale, Randtif TILO, undated website, <a href="http://www.unwetterzentrale.de/uwz/299.html">http://www.unwetterzentrale.de/uwz/299.html</a> (accessed 01Sep2007)                                                                                                                                                                                                                                                                                                                                                                        |
| Upstream20071107_pitt         | 1 | Upstream, Anthea Pitt, 07Nov2007, Evacuations under way as storm roars in                                                                                                                                                                                                                                                                                                                                                                                                                                                                          |
| Upstream20071109_davis        | 1 | Upstream, Jonathan Davis, 2007/11/09, Storm Downs Nexen's Buzzard                                                                                                                                                                                                                                                                                                                                                                                                                                                                                  |
| Upstream20071109_oneill       | 1 | Upstream, Michael O'Neill, 2007/11/09, Storms force Ekofisk closures                                                                                                                                                                                                                                                                                                                                                                                                                                                                               |
| Upstream20071109_wells        | 1 | Upstream, Rob Wells, 09Nov2007, Passing storm keeps platforms shut                                                                                                                                                                                                                                                                                                                                                                                                                                                                                 |
| Upstream20071112_pitt         | 1 | Upstream, Anthea Pitt, 12Nov2007, Storm clips Buzzard's wings                                                                                                                                                                                                                                                                                                                                                                                                                                                                                      |
| Wiese (2007)                  | 1 | Wiese, Heiko, Lebensgeschichte. Tiefdruckgebiet Tilo (getauft am 06.11.2007), written on 03Dec2007                                                                                                                                                                                                                                                                                                                                                                                                                                                 |

|                                 |   |                                                                                                                                                                                                                                                                                               |
|---------------------------------|---|-----------------------------------------------------------------------------------------------------------------------------------------------------------------------------------------------------------------------------------------------------------------------------------------------|
|                                 |   | <a href="http://www.met.fu-berlin.de/wetterpate/Lebensgeschichten/Tief_TILO_06_11_07.htm">http://www.met.fu-berlin.de/wetterpate/Lebensgeschichten/Tief_TILO_06_11_07.htm</a>                                                                                                                 |
| Bancroft (2008)                 | 3 | Bancroft, George P, Marine Weather Review - North Atlantic Area. September through December 2007, Mariners Weather Log, Vol 52, No 1, April 2008.<br>-half page report of Storm Tilo with three buoy & 2 ship reports                                                                         |
| Eden (2008)                     | 3 | Eden, Philip, Weather Log, November 2007, Weather, 63(1), i-iv, 2008.                                                                                                                                                                                                                         |
| Eecen (2008)                    | 3 | Eecen PJ, Meteorological Measurements OWEZ. Half year report - 01-07-2007 - 31-12-2007, ECN-E--08-061, OWEZ_R_121_20070701-20071231_wind_resource_2007_2, Oct 2008 (47pp)<br>(met-ocean data across storm period)                                                                             |
| Heyken (2008)                   | 3 | Heyken, Herma, 15 Sturmfluten sind keine Boten des Klimawandels, in Herma Heyken (ed), Jahresbericht 2007, NLWKN Niedersaechsicher Landesbetrieb fuer Wasserwirtschaft, Kuesten- und Naturschutz, pp14-15, Norden, April, 2008                                                                |
| Lefebvre (2008)                 | 1 | Lefebvre, Christiana, Orkan TILO am 8. und 9. November 2007, DWD report 01Jan2008                                                                                                                                                                                                             |
| Magnusson et al (2008)          | 2 | Magnusson, A.K., J. Johannessen, K.-F. Dagestad, O. Breivik, O.J. Aarnes, B. Furevik, Bolge-strom interaksjon til nytte for oljeindustri, WACUSAR_sluttrapport.doc, 19/12/2008                                                                                                                |
| Outzen et al (2008)             | 1 | Outzen, O., K. Herklotz, H. Heinrich, C. Lefebvre, Extreme waves at FINO1 research platform caused by storm 'Tilo' on 9 November 2007, DEWI Magazin No. 33, August 2008.                                                                                                                      |
| Piotkowicz and Soerensen (2008) | 3 | Piotkowicz, Thorsten & Carlo Soerensen, Consequences of Climate Change along the Danish Coasts, Safecoast Action 5A, Danish Coastal Authority, Hojbovej 1, 7600 Lemvig, Denmark, <a href="mailto:kdi@kyst.dk">kdi@kyst.dk</a> , December 2008                                                 |
| Badewien et al (2009)           | 3 | Badewien TH, E Zimmer, A Bartheloma, R Reuter, Towards continuous long-term measurements of suspended particulate matter (SPM) in turbid coastal waters, Ocean Dynamics (2009) 59: 227-238, DOI 10.1007/s10236-009-0183-8                                                                     |
| Behrens & Guenther (2009)       | 3 | Behrens, A. and H. Gunther, Operational wave prediction of extreme storms in Northern Europe, Nat. Hazards, 49, 387-399, 2009                                                                                                                                                                 |
| Emeis and Turk (2009)           | 2 | Emeis, S. and M. Turk, Wind-driven wave heights in the German Bight, Ocean Dynamics, 59, 463-475, 2009                                                                                                                                                                                        |
| Goennert and Buss (2009)        | 3 | Goennert, Gabriele & Thomas Buss, Sturmfluten zur Bemessung von Hochwasserschutzanlagen, Berichte des Landesbetriebes Strassen, Bruecken und Gewaesser Nr.2/2009, Freie und Hansestadt Hamburg, Landesbetrieb Strassen, Bruecken und Gewaesser, Hamburg, ISSN 1867-7959                       |
| Magnusson (2009a)               | 1 | Magnusson, A.K., Forecasting extreme waves in practice, Proceedings Rogue waves 2008, ed. by Michel Olagnon and Marc Previsto, Brest, France, 13-15 Oct., 2008. <a href="http://www.ifremer.fr/web-com/stw2008/rw">http://www.ifremer.fr/web-com/stw2008/rw</a> (pdf date stamp May 19,2009). |
| Magnusson (2009b)               | 1 | Magnusson AK, 2009, What is true sea state? Proceedings of the 11th International Workshop on Wave Hindcasting and Forecasting and Coastal Hazard Symposium, JCOMM Halifax, Canada, Oct 18-23, 2009, Technical Report No 52, WMO/TD-No. 1533, IOC Workshop Report No. 232.                    |
| POL (2009)                      | 3 | POL, Annual Report 2007-2008, Proudman Oceanographic Laboratory, 40pp, 13May2009                                                                                                                                                                                                              |
| Reuter et al (2009)             | 3 | Reuter R, TH Badewien, A Bartholoma, A Braun, A Luebben, J Rullkoetter, A hydrographic time series station in the Wadden Sea (southern North Sea), Ocean Dynamics, DOI 10.1007/s10236-009-0196-3, 2009                                                                                        |
| Rosenthal and Lehner (2009)     | 2 | Rosenthal W. and S Lehner, North Sea cases of extreme individual waves, 11.International Workshop on Wave Hindcasting and Forecasting &                                                                                                                                                       |

|                                  |   |                                                                                                                                                                                                                                                                                            |
|----------------------------------|---|--------------------------------------------------------------------------------------------------------------------------------------------------------------------------------------------------------------------------------------------------------------------------------------------|
|                                  |   | 2.Coastal Hazards Symposium, 2009?                                                                                                                                                                                                                                                         |
| Herrling et al (2010)            | 2 | Herrling, Gerald, Heiko Knaack, Ralf Kaiser, Hanz D. Niemayer, Evaluation of design water levels at the Ems-Dollard estuary considering the effect of a storm surge barrier, Coastal Engineering 2010.                                                                                     |
| Gray et al (2011)                | 2 | Gray AL, O Martinez-Avarado, LH Baker, PA Clark, Conditional symmetric instability in sting-jet storms, QJRMS, 137, 1482-1500, 2011                                                                                                                                                        |
| Groen and Caires (2011a)         | 3 | Groen, Geert and Caires, Sofia, Storm Catalog The Netherlands, nov 2011a, KNMI/Deltares. <a href="http://projects.knmi.nl/hydra/stormcatalogus/index.htm">http://projects.knmi.nl/hydra/stormcatalogus/index.htm</a> (accessed 15June2019 after being placed back online by Josine Camps)  |
| Groen and Caires (2011b)         | 1 | Groen Geert & Caires Sofia, Summary 09-11-2007, nov 2011b, KNMI/Deltares.<br><a href="http://projects.knmi.nl/hydra/stormcatalogus/Cases/05_09-11-2007/Samenvatting/samenvatting.html">http://projects.knmi.nl/hydra/stormcatalogus/Cases/05_09-11-2007/Samenvatting/samenvatting.html</a> |
| Hessner (2011)                   | 1 | Hessner, K., Extreme wave analysis at FINO1 during TILO storm event Nov. 8-9, 2007, Ocean WaveS GmbH data report for DONG Energy Power A/S, OceanWaveS GmbH, Hansekontor, Vor dem Bardowicker Tore 6b, 21339 Luneburg, Germany, July 2011                                                  |
| Magnusson (2011)                 | 1 | Magnusson, Ann Karin, True sea state ...? Comparing different sensors and analyzing techniques, 12th Wave Workshop, Hawaii's Big Island, Oct.30-Nov4, 2011 (32 slides)                                                                                                                     |
| Met Office (2011)                | 1 | MetOffice, Storm surge - November 2007, Met office website last updated 11May2011. <a href="https://www.metoffice.gov.uk/about-us/who/how/case-studies/floods-2007">https://www.metoffice.gov.uk/about-us/who/how/case-studies/floods-2007</a> .                                           |
| Rosenthal et al (2011)           | 2 | Rosenthal W, AL Pleskachevsky, S Lehner, S Bruschi, Observation and modeling of high individual ocean waves and wave groups caused by a variable wind field, 12th International Workshop on Wave Hindcasting and Forecasting, Kohala Coast, Hawai'i, HI, 2011.                             |
| Environment Agency (2012)        | 3 | Environment Agency, Thames Barrier Project Pack 2012, Environment Agency                                                                                                                                                                                                                   |
| Esurge_2007_tilo (2012)          | 1 | Esurge_2007_tilo (2012), North Sea surge (2007) by Phillip Harwood 2012/11/01 18:00                                                                                                                                                                                                        |
| Zorndt et al (2012)              | 2 | Zorndt AC, T Schlurmann, I Grabemann The influence of extreme events on hydrodynamics and salinities in the Weser estuary in the context of climate impact research, Coastal Engineering 2012.[document date stamp 11Oct2012]                                                              |
| AON Benfield (2013)              | 3 | AON Benfield, Historie von 1703 bis 2012: Winterstuerme in Europea, Stand: Januar 2013                                                                                                                                                                                                     |
| Loewe (2013)                     | 3 | Loewe,P, Atmosphaerenphysik, pp37-114, System Nordsee. 2006 & 2007: Zustand und Entwicklungen, ed. by P. Loewe, H. Klein, S. Weigelt-Krenz, Berichte des Bundesamtes fuer Seeschifffahrt und Hydrographie, Nr.49/2013                                                                      |
| Magnusson and Donelan (2013)     | 1 | Magnusson, AK and MA Donelan, The Andrea wave. Characteristics of a measured North Sea rogue wave, Journal of Offshore Mechanics and Arctic Engineering, 135, 1-10, 2013                                                                                                                   |
| Brecht and Frank (2014)          | 1 | Brecht, B and H Frank, High resolution modelling of wind fields for optimization of empirical storm flood predictions, Adv/ Sci. Res., 11, 1-6, 2014                                                                                                                                       |
| Kristandt et al. (2014)          | 3 | Kristandt, J., B. Brecht, H. Frank, H. Knack, Optimization of empirical storm surge forecast-modeling of high resolution wind fields, Die Kuste, 81, 301-348, 2014                                                                                                                         |
| Stoffelen (2014)                 | 2 | Stoffelen, Ad, Modelling Surges, Cork eSurge Training 20-21 Feb 2014.                                                                                                                                                                                                                      |
| Weissenberger & Chouinard (2015) | 3 | Weissenberger S and O Chouinard, Adaptation to Climate Change and Sea Level Rise, Springer Briefs in Environmental Science, 2015.                                                                                                                                                          |
| VH (2016)                        | 3 | Vlaamse Hydrografie, Overzicht van de tijwaarnemingen langs de Belgische                                                                                                                                                                                                                   |



|                                 |   |                                                                                                                                                                                                                                                            |
|---------------------------------|---|------------------------------------------------------------------------------------------------------------------------------------------------------------------------------------------------------------------------------------------------------------|
|                                 |   | kust. Periode 2001-2010 voor Nieuwpoort, Oostende en Zeebrugge, Ministerie van de Vlaamse Gemeenschap, Agentschap Maritieme Dienstverlening en Kust, Afdeling Kust, Vlaamse Hydrografie, Oostende, 38pp, document time stamp 24Feb2016, author='beirenro'  |
| Doneland and Magnusson (2017)   | 1 | Donelan MA & A-K Magnusson, The making of the Andrea Wave and other rogues, Scientific Reports, 7:44124, DOI: 10.1038/srep44124 (2017)                                                                                                                     |
| Hart et al (2017)               | 3 | Hart NCG, SL Gray, PA Clark, Sting-jet windstorms over the North Atlantic: climatology and contribution to extreme wind risk, Journal of Climate, 30, pp 545-5471, 2017                                                                                    |
| Herrling et al (2017)           | 1 | Herrling G, Benninghoff, Zorndt A, Winter C, Drivers of channel-shoal morphodynamics at the outer Weser estuary, Coastal Dynamics 2017, Paper No. 261, pp.333-345                                                                                          |
| Jensen et al (2017)             | 3 | Jensen J, S Niehuser, A Arns, S Dangendorf, Sensor- und risikobasiertes Fruhwarn-system fuer Seedeiche (EarlyDike), AP1 - Sturmflutmonitoring und Sturmflutssimulator - Fachbericht 2016, Siegen, April 2017                                               |
| Larsen et al (2017a)            | 3 | Larsen XG, J Du, R Bolanos, S Larsen, On the impact of wind on the development of wave field during storm Britta, Ocean Dynamics, 67, 1407-1427, 2017a.                                                                                                    |
| Larsen et al (2017b)            | 3 | Larsen, XG et al, Extreme winds and waves for offshore turbines: Coupling atmosphere and wave modeling for design and operation in coastal zones, DTU Wind Energy, (DTU Wind Energy E, vol.154) (Final report for ForskEL project PSO-12020 X-WiWa), 2017b |
| Caithness Windfarm (2018/08/05) | 3 | Caithness Windfarm, Wind Turbine Accident and Incident Compilation, 2018/08/05                                                                                                                                                                             |
| Capellen email 25Sep2018        | 3 | Capellen, John, email of 25Sept2018 with 2 reports, wind speed summary of Skagen during TILO and North Atlantic wind map during TILO                                                                                                                       |
| WIKI20180324                    | 3 | WIKI, Liste der Sturmfluten an der Nordsee, copied 2018/03/24, <a href="https://de.wikipedia.org/wiki/Liste_der_Sturmfluten_an_der_Nordsee">https://de.wikipedia.org/wiki/Liste_der_Sturmfluten_an_der_Nordsee</a>                                         |

Notes:

<sup>1</sup> Type: 1=Tilo focus (or used as key example in general discussion); 2=1-4 case studies with Storm Tilo; 3=Storm Tilo is one of many case studies or mentioned only; 4=Tilo not mentioned

Table S8. List of normal photos of Tilo/Andrea event (arranged by year and then alphabetically)

| Source          | Full Reference and Notes                                                                                                                                                                                                                                                                                                                                                                                                                                                 |
|-----------------|--------------------------------------------------------------------------------------------------------------------------------------------------------------------------------------------------------------------------------------------------------------------------------------------------------------------------------------------------------------------------------------------------------------------------------------------------------------------------|
| BBC (20071109a) | BBC, North Sea flood tide fears recede, Fri 09 November 2007, 1033GMT<br>-PHOTO. Surfer on coast                                                                                                                                                                                                                                                                                                                                                                         |
| BBC (20071109b) | BBC, Thousands go home after tide fear, Friday 9 November, 16:50GMT<br>FIG: [PHOTO] waves battered beach huts at Southwold (Rachel Temple)<br>FIG: [MAP] areas most at risk: Immingham, Kings Lynn, Great Yarmouth, Lowestoft, Felixstowe, Deal<br>FIG: [PHOTO] water breached sea defenses in Great Yarmouth                                                                                                                                                            |
| Heyken (2007)   | Heyken, Herma, Schwere Sturmflut an niedersachsischer Nordseekuste - Dunnenabbruche auf den Inseln,<br>09/11/2007, NLWKN Niedersachsischer Landesbetrieb fuer Wasserwirtschaft, Kuesten- und Naturschutz.<br>PHOTO1. Norddeich mole 09Nov near ferry dock<br>PHOTO2.ferry car gangway Norddeich 09Nov<br>PHOTO3. Storm surge on the dike at Linteler Marsch<br>PHOTO4. Storm surge in the Linteler Marsch by Norden<br>PHOTO5. Storm surge 09 Nov, Norderney, Georgshohe |

|                      |                                                                                                                                                                                                                                                          |
|----------------------|----------------------------------------------------------------------------------------------------------------------------------------------------------------------------------------------------------------------------------------------------------|
| Aftenposten 20071109 | Aftenposten 20071109, Stormen kan være rester av orkanen Noel. Noel forsterket seg igjen over Atlantikhavet og besøkte Norge. Nina Loedemel, 09Nov2007, 1432local<br>-PHOTO. Hurricane Noel in Carribean                                                 |
| Tagesspiegel (2007)  | Der Tagesspiegel, Orkan 'Tilo'. Duenenabbruch kostet Helgoland Millionen, 09/11/2007, 16:55 (mit AFP/ddp)<br>FIG [photo] A flooded access road at the harbour in Domumer Siel (Kreis Aurich)                                                             |
| Outzen et al (2008)  | Outzen, O., K. Herklotz, H. Heinrich, C. Lefebvre, Extreme waves at FINO1 research platform caused by storm 'Tilo' on 9 November 2007, DEWI Magazin No. 33, August 2008.<br>-PHOTO1: photo: damage on working deck of FINO1; FINO1 tower seen from below |
| Stoffelen (2014)     | Stoffelen, Ad, Modelling Surges, Cork eSurge Training 20-21 Feb 2014.<br>-PHOTO. Delfzijl harbor flooded                                                                                                                                                 |

Table S9. Ranking of Tilo/Andrea among recent storms; assessing importance of storm (arranged by year and then alphabetically)

| Source                          | Full Reference and Notes                                                                                                                                                                                                                                                                                                                                                                                         |
|---------------------------------|------------------------------------------------------------------------------------------------------------------------------------------------------------------------------------------------------------------------------------------------------------------------------------------------------------------------------------------------------------------------------------------------------------------|
| BBC (20071109b)                 | BBC, Thousands go home after tide fear, Friday 9 November, 16:50GMT<br>-Benn: TILO most significant storm since 1953<br>-Phil Rothwell EA flood policy: Tilo on same level as 1953 but sea defenses improved                                                                                                                                                                                                     |
| Bergens Tidende (20071108)      | Bergens Tidende, Bolgehøyder opp mot 18 meter. Stormen som kommer inn til kysten i kveld kan bli en av arets toffeste, 08 Nov 2007 15:51 (contributor Leif Gullstein)<br>-TILO expected to be toughest of years<br>-expected Hs 10-11m less than all time high of 12m recorded during Borgny 2006Nov01                                                                                                           |
| Met Office (2007)               | Met Office, 2007. Daily Weather Summary, November 2007<br>-east coast storm surge at 2-2.5m is worst since 1953                                                                                                                                                                                                                                                                                                  |
| North Norfolk News (2007)       | North Norfolk News, Surge floods prompt new erosion fears, 14 November 2007, 01:00, Happisburgh Village Website, <a href="http://www.happisburgh.org.uk/press/nnn141107.html">http://www.happisburgh.org.uk/press/nnn141107.html</a><br>-storm surge was worst since 1953 for north Norfolk                                                                                                                      |
| Piotkowitz and Soerensen (2007) | Piotkowitz, Thorsten & Carlo Soerensen, Consequences of Climate Change along the Danish Coasts, Safecoast Action 5A, Danish Coastal Authority, Højbovej 1, 7600 Lemvig, Denmark, <a href="mailto:kdi@kyst.dk">kdi@kyst.dk</a> , December 2008.<br>-Tilo storm surge in souther Skagerakk was 1 of 20 Danish storm surges in period 1991-2008 acknowledged by Danish Storm Council (DSC) for damage compensation. |
| Tagesspiegel (2007)             | Der Tagesspiegel, Orkan 'Tilo'. Duenenabbruch kostet Helgoland Millionen, 09/11/2007, 16:55 (mit AFP/ddp)<br>-storm surge comparisons with 1976 Capella storm                                                                                                                                                                                                                                                    |
| Magnusson et al (2008)          | Magnusson, A.K., J. Johannessen, K.-F. Dagestad, O. Breivik, O.J. Aarnes, B. Furevik, Bolgestrom interaksjon til nytte for oljeindustri, WACUSAR_sluttrapport.doc, 19/12/2008<br>-no severe hits recorded during TILO; during BRITTA Ekofisk & Valhall evacuated to shore & Valhall had lifeboats damaged on northern side                                                                                       |
| Outzen et al (2008)             | Outzen, O., K. Herklotz, H. Heinrich, C. Lefebvre, Extreme waves at FINO1 research platform caused by storm 'Tilo' on 9 November 2007, DEWI Magazin No. 33, August 2008.<br>-TILO & BRITTA of comparable rank in causing damage to FINO1                                                                                                                                                                         |
| Behrens & Guenther (2009)       | Behrens, A. and H. Gunther, Operational wave prediction of extreme storms in Northern Europe, Nat. Hazards, 49, 387-399, 2009<br>-Anatol 03/12/1999, Lothar 26/12/1999, Jeanette 27/12/2002, Gudrun 08/01/2005, Britta 01/11/2006, Karla 30/12/2006, Kyrill 18/01/2007, Tilo 09/11/2007, Paula26/01/2008, Emma 29/02/2008                                                                                        |
| Emeis and Turk (2009)           | Emeis, S. and M. Turk, Wind-driven wave heights in the German Bight, Ocean Dynamics, 59, 463-475, 2009<br>-Storm Tilo similar to Storm Britta; more severe than storm Erwin 01Jan2005<br>-Erwin & Britta were the worst storms at FINO1 in its first years of operation                                                                                                                                          |
| Gonnert and Buss (2009)         | Goennert, Gabriele & Thomas Buss, Sturmfluten zur Bemessung von Hochwasserschutzanlagen, Berichte des Landesbetriebes Strassen, Bruecken und                                                                                                                                                                                                                                                                     |

|                             |                                                                                                                                                                                                                                                                                                                                                                                                                                                                                                                                                                                                                 |
|-----------------------------|-----------------------------------------------------------------------------------------------------------------------------------------------------------------------------------------------------------------------------------------------------------------------------------------------------------------------------------------------------------------------------------------------------------------------------------------------------------------------------------------------------------------------------------------------------------------------------------------------------------------|
|                             | <p>Gewaesser Nr.2/2009, Freie und Hansestadt Hamburg, Landesbetrieb Strassen, Bruecken und Gewaesser, Hamburg, ISSN 1867-7959.</p> <p>-rank 7 water level 1901-2008: 03/01/76 10/01/76 03/12/99 16/02/62 28/01/94 10/01/95 09/11/07</p>                                                                                                                                                                                                                                                                                                                                                                         |
| Magnusson (2009)            | <p>Magnusson AK, 2009, What is true sea state? Proceedings of the 11th International Workshop on Wave Hindcasting and Forecasting and Coastal Hazard Symposium, JCOMM Halifax, Canada, Oct 18-23, 2009, Technical Report No 52, WMO/TD-No. 1533, IOC Workshop Report No. 232. (powerpoint presentation)</p> <p>-Britta most severe Ekofisk storm in period 1997-2009; Tilo probably rank2; 2 serious storms in period 1997-2006</p>                                                                                                                                                                             |
| POL (2009)                  | <p>POL, Annual Report 2007-2008, Proudman Oceanographic Laboratory, 40pp, 13May2009</p> <p>-50y surge in eastern England; fear that it would be as bad as Jan 1953 surge</p>                                                                                                                                                                                                                                                                                                                                                                                                                                    |
| Reuter et al (2009)         | <p>Reuter R, TH Badewien, A Bartholoma, A Braun, A Luebben, J Rullkoetter, A hydrographic time series station in the Wadden Sea (southern North Sea), Ocean Dynamics, DOI 10.1007/s10236-009-0196-3, 2009</p> <p>-dataset 2007-2008: Kyril, Orkun 18Mar2007; Tilo 09Nov2007; Emma 01Mar2008 (<b>TILO highest surge</b>)</p>                                                                                                                                                                                                                                                                                     |
| Rosenthal and Lehner (2009) | <p>Rosenthal W. and S Lehner, North Sea cases of extreme individual waves, 11.International Workshop on Wave Hindcasting and Forecasting &amp; 2.Coastal Hazards Symposium, 2009?</p> <p>-TILO one of three focus storms; others being Britta 01Nov2006 &amp; New Year's Day storm 01Jan1995</p>                                                                                                                                                                                                                                                                                                                |
| Herrling et al. (2010)      | <p>Herrling, Gerald, Heiko Knaack, Ralf Kaiser, Hanz D. Niemayer, Evaluation of design water levels at the Ems-Dollard estuary considering the effect of a storm surge barrier, Coastal Engineering 2010.</p> <p>-Britta water level in Emden 1cm below all time maximum at Emden.</p> <p>-intercomparison of 3 storm surges along Ems-Dollard estuary: Britta&gt;Tilo&gt;Anatol</p>                                                                                                                                                                                                                            |
| Gray et al (2011)           | <p>Gray AL, O Martinez-Avarado, LH Baker, PA Clark, Conditional symmetric instability in sting-jet storms, QJRMS, 137, 1482-1500, 2011</p> <p>-Comparison TILO 2008 with Great Storm 1987, Anna 2002, Gudrun 2005</p>                                                                                                                                                                                                                                                                                                                                                                                           |
| Groen and Caires (2011a)    | <p>Groen, Geert and Caires, Sofia, Storm Catalog The Netherlands, nov 2011, KNMI/Deltares. <a href="http://projects.knmi.nl/hydra/stormcatalogus/index.htm">http://projects.knmi.nl/hydra/stormcatalogus/index.htm</a> (accessed 15June2019 after being placed back online by Josine Camps)</p> <p>-part of top 3 hydraulic events (in list of 17 storm surges; with 01Feb1983 &amp; 1953 storm?)</p> <p>-first time since construction that Nieuwe Waterweg &amp; Maeslantkering were operationally closed</p> <p>-water level at Hoek van Holland highest since 1954 but still 90cm lower than 1953 storm</p> |
| Groen and Caires (2011b)    | <p>Groen Geert &amp; Caires Sofia, Summary 09-11-2007, nov 2011b, KNMI/Deltares. <a href="http://projects.knmi.nl/hydra/stormcatalogus/Cases/05_09-11-2007/Samenvatting/samenvatting.html">http://projects.knmi.nl/hydra/stormcatalogus/Cases/05_09-11-2007/Samenvatting/samenvatting.html</a></p> <p>-part of top 3 hydraulic events (in list of 17 storm surges; with 01Feb1983 &amp; 1953 storm?)</p> <p>-first time since construction that Nieuwe Waterweg &amp; Maeslantkering were operationally closed</p>                                                                                              |
| Hessner (2011)              | <p>Hessner, K., Extreme wave analysis at FINO1 during TILO storm event Nov. 8-9, 2007, Ocean WaveS GmbH data report for DONG Energy Power A/S, OceanWaveS GmbH, Hansekontor, Vor dem Bardowicker Tore 6b, 21339 Luneburg, Germany, July 2011</p> <p>-TILO &amp; BRITTA both caused damage to working deck of FINO1</p>                                                                                                                                                                                                                                                                                          |
| Magnusson (2011)            | <p>Magnusson, Ann Karin, True sea state ...? Comparing different sensors and analyzing techniques, 12th Wave Workshop, Hawaii's Big Island, Oct.30-Nov4, 2011 (32 slides)</p> <p>-list of 21 storm cases at Ekofisk 2007-2009; Ekofisk is rank 1 followed by storm 18Mar2007</p>                                                                                                                                                                                                                                                                                                                                |
| Rosenthal et al (2011)      | <p>Rosenthal W, AL Pleskachevsky, S Lehner, S Bruschi, Observation and modeling of high individual ocean waves and wave groups caused by a variable wind field, 12th International Workshop on Wave Hindcasting and Forecasting, Kohala Coast, Hawai'i, HI, 2011.</p> <p>-storm TILO one of top three (01Jan1995 and storm BRITTA 01Nov2006) to calculate return period of extreme storms with wave events that can damage FINO1 research platform</p>                                                                                                                                                          |

|                                  |                                                                                                                                                                                                                                                                                                                                                                                                                                                                                                                                                          |
|----------------------------------|----------------------------------------------------------------------------------------------------------------------------------------------------------------------------------------------------------------------------------------------------------------------------------------------------------------------------------------------------------------------------------------------------------------------------------------------------------------------------------------------------------------------------------------------------------|
| Esurge_2007_tilo (2012)          | Esurge_2007_tilo (2012), North Sea surge (2007) by Phillip Harwood 2012/11/01 18:00<br>-highest surge in the North Sea for 20 years; at one stage feared it would be as bad as 1953                                                                                                                                                                                                                                                                                                                                                                      |
| Zorndt et al. (2012)             | Zorndt AC, T Schlurmann, I Grabemann The influence of extreme events on hydrodynamics and salinities in the Weser estuary in the context of climate impact research, Coastal Engineering 2012.[document date stamp 11Oct2012]<br>-water levels in Weser estuary higher for TILO 2007 than BRITTA 2006<br>-BRITTA & TILO worst storm surges of recent times                                                                                                                                                                                               |
| AON Benfield (2013)              | AON Benfield, Historie von 1703 bis 2012: Winterstuerme in Europe, Stand: Januar 2013<br>-TILO & BRITTA not among top insurance losses                                                                                                                                                                                                                                                                                                                                                                                                                   |
| Loewe (2013)                     | Loewe,P, Atmosphaerenphysik, pp37-114, System Nordsee. 2006 & 2007: Zustand und Entwicklungen, ed. by P. Loewe, H. Klein, S. Weigelt<br>-most serious storms 2006-7 & 2007-8 winters: Britta 01Nov2006, Franz 12Jan2007, Orkun 18Mar2007, Tilo 09Nov2007 with Cuxhaven high water levels: 239, 223, 227, 290; Tilo at rank 1<br>-Britta & Tilo storm surges assessed to be worst of last 100 years on Niedersachsen coast; Kyrill has higher wind speeds but there was mismatch in wind intensity & tidal cycle.                                         |
| Brecht and Frank (2014)          | Brecht, B and H Frank, High resolution modelling of wind fields for optimization of empirical storm flood predictions, Adv/ Sci. Res., 11, 1-6, 2014<br>-3 biggest surges of 20 <sup>th</sup> century 1962, 1976, 1999; 1962 with 315 fatalities<br>-3 very severe surges of 20 <sup>th</sup> century 2006, 2007, 2013                                                                                                                                                                                                                                   |
| Kristandt et al (2014)           | Kristandt, J., B. Brecht, H. Frank, H. Knack, Optimization of empirical storm surge forecast-modeling of high resolution wind fields, Die Kuste, 81, 301-348, 2014<br>-COSMO focus studies for TILO 2007, KYRILL 2007, BRITTA 2006<br>-data table listing TILO among 39 most serious storm surges 1962-2011; TILO 6 <sup>th</sup> in list (3 <sup>rd</sup> if equal levels removed)                                                                                                                                                                      |
| Weissenberger & Chouinard (2015) | Weissenberger S and O Chouinard, Adaptation to Climate Change and Sea Level Rise, Springer Briefs in Environmental Science, 2015.<br>-storm TILO 2007 was the only time Delta works dams activated in interval between completion 1990s & 2012                                                                                                                                                                                                                                                                                                           |
| VH (2016)                        | Vlaamse Hydrografie, Overzicht van de tijwaarnemingen langs de Belgische kust. Periode 2001-2010 voor Nieuwpoort, Oostende en Zeebrugge, Ministerie van de Vlaamse Gemeenschap, Agentschap Maritieme Dienstverlening en Kust, Afdeling Kust, Vlaamse Hydrografie, Oostende, 38pp, document time stamp 24Feb2016, author='beirenro'<br>-storm surge above thresholds for Nieuwpoort, Oostende, Zeebrugge<br>-09Nov2007 previous exceedances: 02Jan1995 for Nieuwpoort & 01Feb1953 for Oostende & Zeebrugge<br>-BRITTA not included at any Belgian station |
| Jensen et al (2017)              | Jensen J, S Niehuser, A Arns, S Dangendorf, Sensor- und risikobasiertes Fruhwarn-system fuer Seedeiche (EarlyDike), API - Sturmflutmonitoring und Sturmflutssimulator - Fachbericht 2016, Siegen, April 2017<br>-Tilo surge residual time series included in top 10 list in Fig.4-4                                                                                                                                                                                                                                                                      |
| Larsen et al (2017)              | Larsen XG, J Du, R Bolanos, S Larsen, On the impact of wind on the development of wave field during storm Britta, Ocean Dynamics, 67, 1407-1427, 2017.<br>-table comparing storms of highest Hs in the North Sea from 2005/01/08 (Erwin) to 2013/01/30 (unnamed)<br>-Tilo>Britta>>all other storms<br>-highest Hs at FINO1 measured during Tilo; assessed as 20y return value                                                                                                                                                                            |

Table S10. Storm Tilo/Andrea: severe forecast (arranged by year and then alphabetically)

| Source               | Full Reference and Notes                                                                                                                                                                                                                                                                      |
|----------------------|-----------------------------------------------------------------------------------------------------------------------------------------------------------------------------------------------------------------------------------------------------------------------------------------------|
| Aftenposten 20071106 | Aftenposten, Ekofisk og Valhall evakueres for stormen.1500 ansatte pa oljefeltene kofisk og Valhall i Nordsjoen kan bli evakuerte for den forventede storm Andrea natt til fredag. 06Nov2007 13:35<br>-advance forecast for Andrea storm on 06Nov2007 enables evacuation of Ekofisk & Valhall |

|                            |                                                                                                                                                                                                                                                                                                                                                                                                                                                                                      |
|----------------------------|--------------------------------------------------------------------------------------------------------------------------------------------------------------------------------------------------------------------------------------------------------------------------------------------------------------------------------------------------------------------------------------------------------------------------------------------------------------------------------------|
| BBC (20070911b)            | BBC, Thousands go home after tide fear, Friday 9 November, 16:50GMT<br>-Gordon Brown chairs COBRA meeting morning 09Nov2007                                                                                                                                                                                                                                                                                                                                                          |
| Bergens Tidende (20071108) | Bergens Tidende, Bolgehøyder opp mot 18 meter. Stormen som kommer inn til kysten i kveld kan bli en av arets toffeste, 08 Nov 2007 15:51 (contributor Leif Gullstein)<br>-Tilo expected to be year's toughest storm with Hs 10-11m                                                                                                                                                                                                                                                   |
| Guardian (20071112)        | The Guardian, Environmental disaster as Russian tanker sinks, Mon, 2007/11/12, 09:18 GMT (reporter: Luke Harding, Moscow)<br>-severe weather forecast issue 1 day before Black Sea ship disaster                                                                                                                                                                                                                                                                                     |
| Telegraph (20071111)       | The Telegraph, Ecological disaster feared after tanker sinks, (contributor: Paul Eccleston) (11Nov2007)<br>-advanced forecast of severe storm in Black Sea from 10Nov2007; ships still left port                                                                                                                                                                                                                                                                                     |
| MetOffice (2011)           | MetOffice, Storm surge - November 2007, Met office website last updated 11May2011. <a href="https://www.metoffice.gov.uk/about-us/who/how/case-studies/floods-2007">https://www.metoffice.gov.uk/about-us/who/how/case-studies/floods-2007</a><br>-forecast of biggest surge for 50 years on East coast<br>-water levels 10cm below top of sea defenses in Great Yarmouth; hairs breadth of breaching them<br>-4 BOBR briefings<br>-forecast water levels 50-90cm above alert levels |
| Esurge_2007_tilo (2012)    | Esurge_2007_tilo (2012), North Sea surge (2007) by Phillip Harwood 2012/11/01 18:00<br>-feared it would be similar to the 1953 catastrophe<br>-deep area of low pressure – Cyclone Tilo<br>-in UK storm surge forecasts starting 05Nov; 63 mph winds & storm surges up to 3m                                                                                                                                                                                                         |

Table S11. Storm Tilo/Andrea: not as bad as expected (arranged by year and then alphabetically)

| Source                    | Full Reference and Notes                                                                                                                                                                                                                                                                                                                                                                                     |
|---------------------------|--------------------------------------------------------------------------------------------------------------------------------------------------------------------------------------------------------------------------------------------------------------------------------------------------------------------------------------------------------------------------------------------------------------|
| BBC (20071109b)           | BBC, Thousands go home after tide fear, Friday 9 November, 16:50GMT<br>-water levels 20cm lower than originally feared<br>-widespread fears flooding diminished as tides peaked without dyke breaches                                                                                                                                                                                                        |
| North Norfolk News (2007) | North Norfolk News, Surge floods prompt new erosion fears, 14 November 2007, 01:00, Happisburgh Village Website, <a href="http://www.happisburgh.org.uk/press/nnn141107.html">http://www.happisburgh.org.uk/press/nnn141107.html</a><br>-storm surge was not as high as expected because wind direction was off                                                                                              |
| Capellen email 25Sep2019  | Email from John Capellen DMI on 25Sep1999<br>-Tilo not mentioned in Denmark storm list, annual climate summary or Vejret magazine                                                                                                                                                                                                                                                                            |
| Tagesspiegel (2007)       | Der Tagesspiegel, Orkan 'Tilo'. Duenenabbruch kostet Helgoland Millionen, 09/11/2007, 16:55 (mit AFP/ddp)<br>-storm flooding damage Tilo 500,000 EUR compared with 330,000,000EUR for Jan 2007 storm                                                                                                                                                                                                         |
| Metoffice (2011)          | MetOffice, Storm surge - November 2007, Met office website last updated 11May2011. <a href="https://www.metoffice.gov.uk/about-us/who/how/case-studies/floods-2007">https://www.metoffice.gov.uk/about-us/who/how/case-studies/floods-2007</a><br>-winds were largely offshore; waves not as high as could have been<br>-storm surge had lessened 20-30cm from previous forecast while travelling down coast |
| Esurge_2007_tilo (2012)   | Esurge_2007_tilo (2012), North Sea surge (2007) by Phillip Harwood 2012/11/01 18:00<br>-‘... this worst case scenario failed to materialize’<br>-dissipation of the storm & the fact that winds were largely offshore<br>-on average the storm surge was 20–30 cm less than predictions                                                                                                                      |

Table S12. Storm Tilo/Andrea: Extended period bad weather (arranged by year and then alphabetically)

| Source               | Full Reference and Notes                                                                                                                                                                                                                                                         |
|----------------------|----------------------------------------------------------------------------------------------------------------------------------------------------------------------------------------------------------------------------------------------------------------------------------|
| Aftenposten 20071106 | Aftenposten, Ekofisk og Valhall evakueres for stormen. 1500 ansatte på oljefeltene kofisk og Valhall i Nordsjøen kan bli evakuerte for den forventede storm Andrea natt til fredag. 06Nov2007 13:35<br>-evacuation of Valhall & Ekofisk for Andrea storm from Thursday 08Nov2007 |
| BBC (20071109a)      | BBC, North Sea flood tide fears recede, Fri 09 November 2007, 1033GMT                                                                                                                                                                                                            |

|                         |                                                                                                                                                                                                                                                                                                                                                                                                                                                                                                                                                                  |
|-------------------------|------------------------------------------------------------------------------------------------------------------------------------------------------------------------------------------------------------------------------------------------------------------------------------------------------------------------------------------------------------------------------------------------------------------------------------------------------------------------------------------------------------------------------------------------------------------|
|                         | -2 days of UK storm surge only: Nov8-9 2007                                                                                                                                                                                                                                                                                                                                                                                                                                                                                                                      |
| Cargolaw (2007)         | Cargolaw, International vessel casualties & pirates database for year 2007 – Jan. through Dec. 2007, <a href="http://www.cargolaw.com/presentation_casualties.07.html">http://www.cargolaw.com/presentation_casualties.07.html</a> , downloaded from the Internet 14Sep2018<br>-bad weather ship accidents Nov6-12, 2007                                                                                                                                                                                                                                         |
| PON (2007)              | PON_1_2007_data (MS Excel spreadsheet, 'published on 12/03/2013'), hyperlink access from: <a href="https://www.gov.uk/guidance/oil-and-gas-environmental-alerts-and-incident-reporting">https://www.gov.uk/guidance/oil-and-gas-environmental-alerts-and-incident-reporting</a> , Oil and gas: environmental alerts and incident reporting including anonymous reporting. (spreadsheet downloaded 14Sep2018, document timestamp 15Jun2012)<br>-7 cases of offshore leakages in period 06-11Nov2007; 2 weather incidents explicitly specified 08Nov & 09 Nov 2007 |
| KIT20071117             | KIT20071117, Sturm, Schnee, Regen. Mitteleuropa/Schwarzes Meer 09.-13.11.2007 (text CE), Karlsruhe Institute of Technology, Wettergefahren-Fruehwarnung, Institut fuer Meteorologie und Klimaforschung, Samstag, 17.November 2007, 18:00MEZ<br>-title has 09-13Nov2007<br>-analysis maps 06-13Nov2007<br>-Stefan-Noel-Tilo-Valter-Urs-Wolf<br>-North Sea coastal stations still registering peak gusts Nov10                                                                                                                                                     |
| Met Eireann (2007)      | Met Eireann, Monthly Weather Bulletin, No.259, November 2007.<br>-extended period bad weather Europe Nov8-11                                                                                                                                                                                                                                                                                                                                                                                                                                                     |
| MIROS-Ekofisk (2007)    | MIROS, Ekofisk Monthly Report, November 2007. Doc No. ND/1024/07/11, Project: 1024-800 Ekofisk Met-Ocean Data Recording, Classification Open. Date 19December2007, prepared by AKS<br>-sea state crosses 4m threshold 06-13 Nov 2007                                                                                                                                                                                                                                                                                                                             |
| Unwetterzentrale (2007) | Unwetterzentrale, Randtif TILO, undated website, <a href="http://www.unwetterzentrale.de/uwz/299.html">http://www.unwetterzentrale.de/uwz/299.html</a> (accessed 01Sep2007)<br>-duration of influence in middle Europe 08-12Nov2007                                                                                                                                                                                                                                                                                                                              |
| Upstream20071107_pitt   | Upstream, Anthea Pitt, 07Nov2007, Evacuations under way as storm roars in<br>-Valhall platform closed starting at end 07Nov 2007                                                                                                                                                                                                                                                                                                                                                                                                                                 |
| Upstream20071109_wells  | Upstream, Rob Wells, 09Nov2007, Passing storm keeps platforms shut<br>-StatoilHydro platforms Visund & Oseberg South closed from Thursday                                                                                                                                                                                                                                                                                                                                                                                                                        |
| Aftenposten 20071109    | Aftenposten 20071109, Stormen kan vaere rester av orkanen Noel. Noel forsterket seg igjen over Atlantikhavet og besøkte Norge. Nina Loedemel, 09Nov2007, 1432local<br>-Andrea storm Norway was continuation of Hurricane Noel from Carribbean                                                                                                                                                                                                                                                                                                                    |
| Eecen (2008)            | Eecen PJ, Meteorological Measurements OWEZ. Half year report - 01-07-2007 - 31-12-2007, ECN-E--08-061, OWEZ_R_121_20070701-20071231_wind_resource_2007_2, Oct 2008 (47pp)<br>-high wind speed period 05-13 Nov 2007<br>-lowest pressure 09 & 14 Nov 2007                                                                                                                                                                                                                                                                                                         |
| Magnusson et al (2008)  | Magnusson, A.K., J. Johannessen, K.-F. Dagestad, O. Breivik, O.J. Aarnes, B. Furevik, Bolgestrom interaksjon til nytte for oljeindustri, WACUSAR_sluttrapport.doc, 19/12/2008<br>-FOBOX waverider near Karmoy shows first Hs exceedance over 4m 06-11 Nov 2007                                                                                                                                                                                                                                                                                                   |
| Outzen et al (2008)     | Outzen, O., K. Herklotz, H. Heinrich, C. Lefebvre, Extreme waves at FINO1 research platform caused by storm 'Tilo' on 9 November 2007, DEWI Magazin No. 33, August 2008.<br>-period of intense storm 08-09Nov2007<br>-time series of Hs indicates Hs>4m between 06-13 Nov 2007                                                                                                                                                                                                                                                                                   |
| Badewien et al (2009)   | Badewien TH, E Zimmer, A Bartheloma, R Reuter, Towards continuous long-term measurements of suspended particulate matter (SPM) in turbid coastal waters, Ocean Dynamics (2009) 59: 227-238, DOI 10.1007/s10236-009-0183-8                                                                                                                                                                                                                                                                                                                                        |

|                              |                                                                                                                                                                                                                                                                                                                                         |
|------------------------------|-----------------------------------------------------------------------------------------------------------------------------------------------------------------------------------------------------------------------------------------------------------------------------------------------------------------------------------------|
|                              | -wind speed time series showing 3 wind speed peaks Nov6,9,13, 2007                                                                                                                                                                                                                                                                      |
| Magnusson (2009b)            | Magnusson AK, 2009, What is true sea state, Proceedings of the 11th International Workshop on Wave Hindcasting and Forecasting and Coastal Hazard Symposium, JCOMM Halifax, Canada, Oct 18-23, 2009, Technical Report No 52, WMO/TD-No. 1533, IOC Workshop Report No. 232.<br>-Ekofisk storm from 1500 08Nov – 1800 09Nov 2007          |
| Rosenthal and Lehner (2009)  | Rosenthal W. and S Lehner, North Sea cases of extreme individual waves, 11.International Workshop on Wave Hindcasting and Forecasting & 2.Coastal Hazards Symposium, 2009?<br>-high sea state FINO1 on 06-13Nov2007                                                                                                                     |
| Hessner (2011)               | Hessner, K., Extreme wave analysis at FINO1 during TILO storm event Nov. 8-9, 2007, Ocean WaveS GmbH data report for DONG Energy Power A/S, OceanWaveS GmbH, Hansekantor, Vor dem Bardowicker Tore 6b, 21339 Lüneburg, Germany, July 2011<br>-FIG7 of report shows SWH, peak period & peak wave direction start 05Nov to end 10Nov 2007 |
| Environment Agency (2012)    | Environment Agency, Thames Barrier Project Pack 2012, Environment Agency<br>-Thames Barrier closure only Nov 8-9                                                                                                                                                                                                                        |
| Esurge_2007_tilo (2012)      | Esurge_2007_tilo (2012), North Sea surge (2007) by Phillip Harwood 2012/11/01 18:00<br>-‘from 5 <sup>th</sup> November onwards alerts of possible flooding were raised for East Anglia and SE England’                                                                                                                                  |
| Zorndt et al (2012)          | Zorndt AC, T Schlurmann, I Grabemann The influence of extreme events on hydrodynamics and salinities in the Weser estuary in the context of climate impact research, Coastal Engineering 2012.[document date stamp 11Oct2012]<br>-surge lasted 1.4d for TILO vs 1.5d for BRITTA                                                         |
| Magnusson and Donelan (2013) | Magnusson, AK and MA Donelan, The Andrea wave. Characteristics of a measured North Sea rogue wave, Journal of Offshore Mechanics and Arctic Engineering, 135, 1-10, 2013<br>-shows storm period just over 1 day 08Nov2018 1500 to 09Nov2018 1800                                                                                        |
| Brecht and Frank (2014)      | Brecht, B and H Frank, High resolution modelling of wind fields for optimization of empirical storm flood predictions, Adv/ Sci. Res., 11, 1-6, 2014<br>-storm TILO assumed to have the 4 day duration like most of 39 North Sea storm surge cases 1962-2011                                                                            |

Table S13. Names of the storm (arranged by year and then alphabetically)

| Source                        | Full Reference and Notes                                                                                                                                                                                                                                                                                                                                                                                                                                                                                                                                                                                                                                                                                                                                                                                                                                                                                                                                                                                                                                                                                                                   |
|-------------------------------|--------------------------------------------------------------------------------------------------------------------------------------------------------------------------------------------------------------------------------------------------------------------------------------------------------------------------------------------------------------------------------------------------------------------------------------------------------------------------------------------------------------------------------------------------------------------------------------------------------------------------------------------------------------------------------------------------------------------------------------------------------------------------------------------------------------------------------------------------------------------------------------------------------------------------------------------------------------------------------------------------------------------------------------------------------------------------------------------------------------------------------------------|
| Andrea                        | Aftenposten, Ekofisk og Valhall evakueres for stormen.1500 ansatte pa oljefeltene kofisk og Valhall i Nordsjoen kan bli evakuerte for den forventede storm Andrea natt til fredag. 06Nov2007 13:35<br>Aftenposten 20071109, Stormen kan vaere rester av orkanen Noel. Noel forsterket seg igjen over Atlantikhavet og besøkte Norge. Nina Loedemel, 09Nov2007, 1432local<br>Magnusson, A.K., Forecasting extreme waves in practice, May 19,2009, Rogue waves 2008, Brest, France, 13-15 Oct., 2008. <a href="http://www.ifremer.fr/web-com/stw2008/rw">http://www.ifremer.fr/web-com/stw2008/rw</a><br>Magnusson, A.K., J. Johannessen, K.-F. Dagestad, O. Breivik, O.J. Aarnes, B. Furevik, Bolgestrom interaksjon til nytte for oljeindustri, WACUSAR_sluttrapport.doc, 19/12/2008<br>Magnusson, Ann Karin, True sea state ...? Comparing different sensors and analyzing techniques, 12th Wave Workshop, Hawaii's Big Island, Oct.30-Nov4, 2011 (32 slides)<br>Magnusson, AK and MA Donelan, The Andrea wave. Characteristics of a measured North Sea rogue wave, Journal of Offshore Mechanics and Arctic Engineering, 135, 1-10, 2013 |
| Storm surge – November 2007   | MetOffice, Storm surge - November 2007, Met office website last updated 11May2011. <a href="https://www.metoffice.gov.uk/about-us/who/how/case-studies/floods-2007">https://www.metoffice.gov.uk/about-us/who/how/case-studies/floods-2007</a> .<br>Esurge_2007_tilo (2012), North Sea surge (2007) by Phillip Harwood 2012/11/01 18:00                                                                                                                                                                                                                                                                                                                                                                                                                                                                                                                                                                                                                                                                                                                                                                                                    |
| Stormvloed 09 Nov 2007 (SR88) | RWS, Verslag van de Stormvloed van 9 november 2007 (SR88), Ministerie van Verkeer en Waterstaat, Direktorat-Generaal Rijkswaterstaat Waterdienst, Stormvloedwaarschuwingsdienst/SVSD, Postbus 17, 8200 AA Lelystad <a href="http://www.svsnl.nl">www.svsnl.nl</a> , Lelystad, november 2007, 45pp                                                                                                                                                                                                                                                                                                                                                                                                                                                                                                                                                                                                                                                                                                                                                                                                                                          |
| Noordwester                   | Kustwachtcentrum, Persbericht, Noordwester storm, Info nr.1, 09Nov/2007                                                                                                                                                                                                                                                                                                                                                                                                                                                                                                                                                                                                                                                                                                                                                                                                                                                                                                                                                                                                                                                                    |

|       |                                                                                                                                                                                                                                                                                                                                                                                                                                                                                                                                                                                                                                                                                                                                                                                                                                                                                                                                                                                                                                                                                                                                                                                                                                                                                                                                                                                                                                                                                                                                                                                                                                                                                                                                                                                                                                                                                                                                                                                                                                                                                                                                                                                                                                                                                                                                                                                                                                                                                                                                                                                                                                                                                                                                                                                                                                                                                                                                                                                                                                                                                                                                                                                                                                                                                                                                                                                                                                                                                                                                                                                                                                                                                                                                                                                                                                                                                                                                                                                                                                                                                                                                                                                                                                                                                                                                      |
|-------|--------------------------------------------------------------------------------------------------------------------------------------------------------------------------------------------------------------------------------------------------------------------------------------------------------------------------------------------------------------------------------------------------------------------------------------------------------------------------------------------------------------------------------------------------------------------------------------------------------------------------------------------------------------------------------------------------------------------------------------------------------------------------------------------------------------------------------------------------------------------------------------------------------------------------------------------------------------------------------------------------------------------------------------------------------------------------------------------------------------------------------------------------------------------------------------------------------------------------------------------------------------------------------------------------------------------------------------------------------------------------------------------------------------------------------------------------------------------------------------------------------------------------------------------------------------------------------------------------------------------------------------------------------------------------------------------------------------------------------------------------------------------------------------------------------------------------------------------------------------------------------------------------------------------------------------------------------------------------------------------------------------------------------------------------------------------------------------------------------------------------------------------------------------------------------------------------------------------------------------------------------------------------------------------------------------------------------------------------------------------------------------------------------------------------------------------------------------------------------------------------------------------------------------------------------------------------------------------------------------------------------------------------------------------------------------------------------------------------------------------------------------------------------------------------------------------------------------------------------------------------------------------------------------------------------------------------------------------------------------------------------------------------------------------------------------------------------------------------------------------------------------------------------------------------------------------------------------------------------------------------------------------------------------------------------------------------------------------------------------------------------------------------------------------------------------------------------------------------------------------------------------------------------------------------------------------------------------------------------------------------------------------------------------------------------------------------------------------------------------------------------------------------------------------------------------------------------------------------------------------------------------------------------------------------------------------------------------------------------------------------------------------------------------------------------------------------------------------------------------------------------------------------------------------------------------------------------------------------------------------------------------------------------------------------------------------------------------|
| storm |                                                                                                                                                                                                                                                                                                                                                                                                                                                                                                                                                                                                                                                                                                                                                                                                                                                                                                                                                                                                                                                                                                                                                                                                                                                                                                                                                                                                                                                                                                                                                                                                                                                                                                                                                                                                                                                                                                                                                                                                                                                                                                                                                                                                                                                                                                                                                                                                                                                                                                                                                                                                                                                                                                                                                                                                                                                                                                                                                                                                                                                                                                                                                                                                                                                                                                                                                                                                                                                                                                                                                                                                                                                                                                                                                                                                                                                                                                                                                                                                                                                                                                                                                                                                                                                                                                                                      |
| Tilo  | <p>KIT20071117, Sturm, Schnee, Regen. Mitteleuropa/Schwarzes Meer 09.-13.11.2007 (text CE), Karlsruhe Institute of Technology, Wettergefahren-Fruehwarnung, Institut fuer Meteorologie und Klimaforschung, Samstag, 17.November 2007, 18:00MEZ</p> <p>Der Tagesspiegel, Orkan 'Tilo'. Duenenabbruch kostet Helgoland Millionen, 09/11/2007, 16:55 (mit AFP/ddp)</p> <p>Unwetterzentrale, Randtif TILO, undated website, <a href="http://www.unwetterzentrale.de/uwz/299.html">http://www.unwetterzentrale.de/uwz/299.html</a> (accessed 01Sep2007)</p> <p>Wiese, Heiko, Lebensgeschichte. Tiefdruckgebiet Tilo (getauft am 06.11.2007), written on 03Dec2007 <a href="http://www.met.fu-berlin.de/wetterpate/Lebensgeschichten/Tief_TILO_06_11_07.htm">http://www.met.fu-berlin.de/wetterpate/Lebensgeschichten/Tief_TILO_06_11_07.htm</a></p> <p>Outzen, O., K. Herklotz, H. Heinrich, C. Lefebvre, Extreme waves at FINO1 research platform caused by storm 'Tilo' on 9 November 2007, DEWI Magazin No. 33, August 2008.</p> <p>Badewien TH, E Zimmer, A Bartheloma, R Reuter, Towards continuous long-term measurements of suspended particulate matter (SPM) in turbid coastal waters, Ocean Dynamics (2009) 59: 227-238, DOI 10.1007/s10236-009-0183-8</p> <p>Emeis, S. and M. Turk, Wind-driven wave heights in the German Bight, Ocean Dynamics, 59, 463-475, 2009</p> <p>Reuter R, TH Badewien, A Bartholoma, A Braun, A Luebben, J Rullkoetter, A hydrographic time series station in the Wadden Sea (southern North Sea), Ocean Dynamics, DOI 10.1007/s10236-009-0196-3, 2009</p> <p>Rosenthal W. and S Lehner, North Sea cases of extreme individual waves, 11.International Workshop on Wave Hindcasting and Forecasting &amp; 2.Coastal Hazards Symposium, 2009?</p> <p>Herrling, Gerald, Heiko Knaack, Ralf Kaiser, Hanz D. Niemayer, Evaluation of design water levels at the Ems-Dollard estuary considering the effect of a storm surge barrier, Coastal Engineering 2010.</p> <p>Gray AL, O Martinez-Avarado, LH Baker, PA Clark, Conditional symmetric instability in sting-jet storms, QJRMS, 137, 1482-1500, 2011.</p> <p>Hessner, K., Extreme wave analysis at FINO1 during TILO storm event Nov. 8-9, 2007, Ocean WaveS GmbH data report for DONG Energy Power A/S, OceanWaveS GmbH, Hansekantor, Vor dem Bardowicker Tore 6b, 21339 Luneburg, Germany, July 2011</p> <p>Rosenthal W, AL Pleskachevsky, S Lehner, S Bruschi, Observation and modeling of high individual ocean waves and wave groups caused by a variable wind field, 12th International Workshop on Wave Hindcasting and Forecasting, Kohala Coast, Hawai'i, HI, 2011.</p> <p>Esurge_2007_tilo (2012), North Sea surge (2007) by Phillip Harwood 2012/11/01 18:00</p> <p>Zorndt AC, T Schlurmann, I Grabemann The influence of extreme events on hydrodynamics and salinities in the Weser estuary in the context of climate impact research, Coastal Engineering 2012.[document date stamp 11Oct2012]</p> <p>AON Benfield, Historie von 1703 bis 2012: Winterstuerme in Europe, Stand: Januar 2013</p> <p>Loewe,P, Atmosphaerenphysik, pp37-114, System Nordsee. 2006 &amp; 2007: Zustand und Entwicklungen, ed. by P. Loewe, H. Klein, S. Welgelt-Krenz, Berichte des Bundesamtes fuer Seeschiffahrt und Hydrographie, Nr.49/2013</p> <p>Brecht, B and H Frank, High resolution modelling of wind fields for optimization of empirical storm flood predictions, Adv/ Sci. Res., 11, 1-6, 2014</p> <p>Kristandt, J, B Brecht, H Frank, H Knaack, Optimization of empirical storm surge forecast – modelling of high resolution wind fields, Die Kuste, 18, 301-308, 2014</p> <p>Weissenberger S and O Chouinard, Adaptation to Climate Change and Sea Level Rise, Springer Briefs in Environmental Science, 2015.</p> <p>Hart NCG, SL Gray, PA Clark, Sting-jet windstorms over the North Atlantic: climatology and contribution to extreme wind risk, Journal of Climate, 30, pp 545-5471, 2017</p> <p>Herrling G, Benninghoff, Zorndt A, Winter C, Drivers of channel-shoal morphodynamics at the outer Weser estuary, Coastal Dynamics 2017, Paper No. 261, pp.333-345</p> <p>Larsen XG, J Du, R Bolanos, S Larsen, On the impact of wind on the development of wave field during storm Britta, Ocean Dynamics, 67, 1407-1427, 2017.</p> |



Table S14. Storm Tilo/Andrea: satellite pictures and weather maps (arranged by year and then alphabetically)

| Source               | Full Reference and Notes                                                                                                                                                                                                                                                                                                                                                                                                                                                                                                                                                                                                                                                                                                                                                                                                                                                                                                                                                                                                                                                                                                                                                                                                                                                                                                                                                                                                                                                                                                                                                                                                                                                                                           |
|----------------------|--------------------------------------------------------------------------------------------------------------------------------------------------------------------------------------------------------------------------------------------------------------------------------------------------------------------------------------------------------------------------------------------------------------------------------------------------------------------------------------------------------------------------------------------------------------------------------------------------------------------------------------------------------------------------------------------------------------------------------------------------------------------------------------------------------------------------------------------------------------------------------------------------------------------------------------------------------------------------------------------------------------------------------------------------------------------------------------------------------------------------------------------------------------------------------------------------------------------------------------------------------------------------------------------------------------------------------------------------------------------------------------------------------------------------------------------------------------------------------------------------------------------------------------------------------------------------------------------------------------------------------------------------------------------------------------------------------------------|
| KIT20071117          | <p>KIT20071117, Sturm, Schnee, Regen. Mitteleuropa/Schwarzes Meer 09.-13.11.2007 (text CE), Karlsruhe Institute of Technology, Wettergefahren-Fruehwarnung, Institut fuer Meteorologie und Klimaforschung, Samstag, 17.November 2007, 18:00MEZ</p> <p>FIG. 8XDWD weather maps covering 06-13Nov</p> <p>FIG. Satellite picture 06/11/2007 12:07UTC, NOAA-18 VIS/IR. Source: BJ Bruton</p> <p>FIG. Satellite picture 07/11/2007 11:00UTC, TERRA VIS. Source NASA Earth Lab</p> <p>FIG. Satellite picture 08/11/2007 15:41UTC, NOAA-15 IR. Source: Geog. Inst., Uni Bern</p> <p>FIG. Satellite picture 09/11/2007 11:45UTC, Meteosat VIS. Source: EUMETSAT</p> <p>FIG. Satellite picture 10/11/2007 13:05UTC, NOAA-18 VIS/IR. Source: BJ Burton</p> <p>FIG. Satellite picture 11/11/2007 12:45UTC, Meteosat VIS. Source: EUMETSAT</p> <p>FIG. Satellite picture 12/11/2007 15:45UTC, NOAA-15 IR. Source: Geog Inst Uni Bern</p> <p>FIG. Satellite picture 13/11/2007 11:45UTC, Meteosat VIS. Source: EUMETSAT</p>                                                                                                                                                                                                                                                                                                                                                                                                                                                                                                                                                                                                                                                                                                     |
| Met Eireanne (2007)  | <p>Met Eireann, Monthly Weather Bulletin, No.259, November 2007</p> <p>-FIG1. Synoptic chart Nov8/2007 0000UTC</p> <p>-FIG2. Synoptic chart Nov9/2007 0000UTC</p> <p>-FIG3. Satellite image (IR?) Nov8/2007 1115UTC Northwest Europe</p> <p>-FIG4. Satellite image (IR?) Nov11/2007 1111UTC Black Sea &amp; Ukraine</p>                                                                                                                                                                                                                                                                                                                                                                                                                                                                                                                                                                                                                                                                                                                                                                                                                                                                                                                                                                                                                                                                                                                                                                                                                                                                                                                                                                                            |
| Met Office (2007)    | <p>Met Office, 2007. Daily Weather Summary, November 2007</p> <p>-FIG. [map] surface pressure analysis 0000UTC 08Nov2007 showing TILO low P 986 hPa N of Scotland</p> <p>-FIG. [map] surface pressure analysis 1200UTC 08Nov2007 showing TILO low P 977 hPa over Bergen</p> <p>-FIG. [map] Europe sfc reports P, airt, cloud cover, wspd/wdir 0000GMT 08Nov2007</p> <p>-FIG. [map] UK only sfc reports P, airt, cloud cover, wspd/wdir 0600GMT 08Nov2007</p> <p>-FIG. [map] Europe sfc reports P, airt, cloud cover, wspd/wdir 1200GMT 08Nov2007</p> <p>-FIG. [map] UK only sfc reports P, airt, cloud cover, wspd/wdir 1800GMT 08Nov2007</p> <p>-FIG. [map] UK only significant weather with thunderstorm &amp; convection</p> <p>-FIG. [map] UK only min &amp; max temperature showing up to 5C decr with cold front</p> <p>-FIG. [map] AM &amp; PM rainfall; max 7 mm Scotland, 6mm England</p> <p>-FIG. [map] surface pressure analysis 0000UTC 09Nov2007 showing TILO low P ??? hPa over Bergen</p> <p>-FIG. [map] surface pressure analysis 1200UTC 09Nov2007 showing TILO low P 984 hPa N Baltic</p> <p>-FIG. [map] Europe sfc reports P, airt, cloud cover, wspd/wdir 0000GMT 09Nov2007</p> <p>-FIG. [map] UK only sfc reports P, airt, cloud cover, wspd/wdir 0600GMT 09Nov2007</p> <p>-FIG. [map] Europe sfc reports P, airt, cloud cover, wspd/wdir 1200GMT 09Nov2007</p> <p>-FIG. [map] UK only sfc reports P, airt, cloud cover, wspd/wdir 1800GMT 09Nov2007</p> <p>-FIG. [map] UK only significant weather with thunderstorm &amp; convection</p> <p>-FIG. [map] UK only min &amp; max temperature showing up to 9C decr with cold front</p> <p>-FIG. [map] AM &amp; PM rainfall; low ppt levels</p> |
| RWS (2007)           | <p>RWS, Verslag van de Stormvloed van 9 november 2007 (SR88), Ministerie van Verkeer en Waterstaat, Directoraat-Generaal Rijkswaterstaat Waterdienst, Stormvloedwaarschuwingsdienst/SVSD, Postbus 17, 8200 AA Lelystad <a href="http://www.svsd.nl">www.svsd.nl</a>, Lelystad, november 2007, 45pp</p> <p>-FIG0. Satellite pic (vis) of storm 08Nov2007 2000U? with cloud band at Dutch coast</p>                                                                                                                                                                                                                                                                                                                                                                                                                                                                                                                                                                                                                                                                                                                                                                                                                                                                                                                                                                                                                                                                                                                                                                                                                                                                                                                  |
| Aftenposten 20071109 | <p>Aftenposten 20071109, Stormen kan vaere rester av orkanen Noel. Noel forsterket seg igjen over Atlantikhavet og besøkte Norge. Nina Loedemel, 09Nov2007, 1432local</p> <p>FIG1. Andrea at 19:00 Thursday night, when the wind increased to storm strength over Rogaland. The low pressure center was over Rogaland &amp; on way southeast. FOTO Meteorologisk Institut.</p> <p>MSG VISIR_Europea_Meteosat 3-9-10 1007 2007-11-08 18:00</p> <p>Thursday 2007-11-08 18UTC</p> <p>FIG2. Satellite image NOAA-17 S-Norge-(SAF_SE) 1+2+4 2007-11-09 10:23.</p>                                                                                                                                                                                                                                                                                                                                                                                                                                                                                                                                                                                                                                                                                                                                                                                                                                                                                                                                                                                                                                                                                                                                                       |

|                             |                                                                                                                                                                                                                                                                                                                                                                                                                                                                                                                                                                                                                                                                                                                                                                                                                                                                                                                                                                                                                                                                                                              |
|-----------------------------|--------------------------------------------------------------------------------------------------------------------------------------------------------------------------------------------------------------------------------------------------------------------------------------------------------------------------------------------------------------------------------------------------------------------------------------------------------------------------------------------------------------------------------------------------------------------------------------------------------------------------------------------------------------------------------------------------------------------------------------------------------------------------------------------------------------------------------------------------------------------------------------------------------------------------------------------------------------------------------------------------------------------------------------------------------------------------------------------------------------|
|                             | Friday 2007-11-09 12UTC                                                                                                                                                                                                                                                                                                                                                                                                                                                                                                                                                                                                                                                                                                                                                                                                                                                                                                                                                                                                                                                                                      |
| Bancroft (2008)             | Bancroft, George P, Marine Weather Review - North Atlantic Area. September through December 2007, Mariners Weather Log, Vol 52, No 1, April 2008.<br>-NE Atlantic weather map 12UTC Nov 7 & 12UTC Nov 8/2007                                                                                                                                                                                                                                                                                                                                                                                                                                                                                                                                                                                                                                                                                                                                                                                                                                                                                                 |
| Eden (2008)                 | -daily surface pressure maps Europe                                                                                                                                                                                                                                                                                                                                                                                                                                                                                                                                                                                                                                                                                                                                                                                                                                                                                                                                                                                                                                                                          |
| Lefebvre (2008)             | Lefebvre, Christiana, Orkan TILO am 8. und 9. November 2007, DWD report 01Jan2008<br>FIG1. Path of hurricane centre of TILO with 6h position of low centre<br>FIG2. Surface analysis of sea level pressure from 08/11/2007 12UTC, 18UTC; 09/11/2007 00, 06, 12, 18UTC<br>FIG6. MAP: Wind direction & speed as 10min averages at midday on 09/11/2007 in knot<br>FIG7. MAP: The highest wind gust in knot between 1015-1315 MEZ on 09/11/2007 (1 km/h is 1kt * 1.85)                                                                                                                                                                                                                                                                                                                                                                                                                                                                                                                                                                                                                                          |
| Magnusson et al (2008)      | Magnusson, A.K., J. Johannessen, K.-F. Dagestad, O. Breivik, O.J. Aarnes, B. Furevik, Bolgestrom interaksjon til nytte for oljeindustri, WACUSAR_sluttrapport.doc, 19/12/2008<br>-FIG13. ENVISAT ASAR for 09Nov2013 10:00UTC with derived info for significant wave height & peak wavelength                                                                                                                                                                                                                                                                                                                                                                                                                                                                                                                                                                                                                                                                                                                                                                                                                 |
| Outzen et al (2008)         | Outzen, O., K. Herklotz, H. Heinrich, C. Lefebvre, Extreme waves at FINO1 research platform caused by storm 'Tilo' on 9 November 2007, DEWI Magazin No. 33, August 2008.<br>-FIG2: 6 DWD weather maps Nov8 (12,18UTC) & NOV9 (00,06,12,18)                                                                                                                                                                                                                                                                                                                                                                                                                                                                                                                                                                                                                                                                                                                                                                                                                                                                   |
| Rosenthal and Lehner (2009) | Rosenthal W. and S Lehner, North Sea cases of extreme individual waves, 11.International Workshop on Wave Hindcasting and Forecasting & 2.Coastal Hazards Symposium, 2009?<br>-weather map for 09Nov2007, 0000UTC                                                                                                                                                                                                                                                                                                                                                                                                                                                                                                                                                                                                                                                                                                                                                                                                                                                                                            |
| Gray et al (2011)           | Gray AL, O Martinez-Avarado, LH Baker, PA Clark, Conditional symmetric instability in sting-jet storms, QJRM, 137, 1482-1500, 2011<br>-0100 UTC 08Nov2007                                                                                                                                                                                                                                                                                                                                                                                                                                                                                                                                                                                                                                                                                                                                                                                                                                                                                                                                                    |
| Groen and Caires (2011b)    | Groen Geert & Caires Sofia, Summary 09-11-2007, nov 2011b, KNMI/Deltares.<br><a href="http://projects.knmi.nl/hydra/stormcatalogus/Cases/05_09-11-2007/Samenvatting/samenvatting.html">http://projects.knmi.nl/hydra/stormcatalogus/Cases/05_09-11-2007/Samenvatting/samenvatting.html</a><br>-FIG1. [map] map North Atlantic with 500hPa geopotential & surface pressure 08Nov2007 00:00UTC; from Wetterzentrale using NCEP reanalysis<br>-FIG2. [map] map North Atlantic with 500hPa geopotential & surface pressure 09Nov2007 00:00UTC; from Wetterzentrale using NCEP reanalysis<br>-FIG3. [map] map North Atlantic with 500hPa geopotential & surface pressure 10Nov2007 00:00UTC; from Wetterzentrale using NCEP reanalysis<br>-FIG4. [map] map North Atlantic with 850hPa temperature 08Nov2007 00:00UTC; from Wetterzentrale using NCEP reanalysis<br>-FIG5. [map] map North Atlantic with 850hPa temperature 09Nov2007 00:00UTC; from Wetterzentrale using NCEP reanalysis<br>-FIG6. [map] map North Atlantic with 850hPa temperature 10Nov2007 00:00UTC; from Wetterzentrale using NCEP reanalysis |
| Rosenthal et al (2011)      | Rosenthal W, AL Pleskachevsky, S Lehner, S Bruschi, Observation and modeling of high individual ocean waves and wave groups caused by a variable wind field, 12th International Workshop on Wave Hindcasting and Forecasting, Kohala Coast, Hawai'i, HI, 2011.<br>-FIG3. NOAA AVHRR thermal infrared image on 9.11.2007, 03.20 UTC                                                                                                                                                                                                                                                                                                                                                                                                                                                                                                                                                                                                                                                                                                                                                                           |
| Brecht and Frank (2014)     | Brecht, B and H Frank, High resolution modelling of wind fields for optimization of empirical storm flood predictions, Adv/ Sci. Res., 11, 1-6, 2014<br>-FIG2. map of locations of available data for 9 Nov 2018<br>-FIG3. Map of North Sea surface pressure field and 10m wind speed and direction the 09Nov2007 0600UTC<br>-FIG5. Map of northwest Europe showing model wind speed bias with respect to nudging run                                                                                                                                                                                                                                                                                                                                                                                                                                                                                                                                                                                                                                                                                        |
| Stoffelen (2014)            | Stoffelen, Ad, Modelling Surges, Cork eSurge Training 20-21 Feb 2014.                                                                                                                                                                                                                                                                                                                                                                                                                                                                                                                                                                                                                                                                                                                                                                                                                                                                                                                                                                                                                                        |
| Capellen (20180925)         | Capellen, John, email of 25Sept2018 with 2 reports, wind speed summary of Skagen during TILO and North Atlantic wind map during TILO                                                                                                                                                                                                                                                                                                                                                                                                                                                                                                                                                                                                                                                                                                                                                                                                                                                                                                                                                                         |

|  |                                                                                              |
|--|----------------------------------------------------------------------------------------------|
|  | -gridded field of 10m wind speed over Europe and North Atlantic for Friday 09Nov2007 0600UTC |
|--|----------------------------------------------------------------------------------------------|

Table S15. Storm Tilo/Andrea: list meteorological data (arranged by year and then alphabetically)

| Source               | Full Reference and Notes                                                                                                                                                                                                                                                                                                                                                                                                                                                                                                                                                                                                                                                                                                                                                                                                                                                                                                                                                                 |
|----------------------|------------------------------------------------------------------------------------------------------------------------------------------------------------------------------------------------------------------------------------------------------------------------------------------------------------------------------------------------------------------------------------------------------------------------------------------------------------------------------------------------------------------------------------------------------------------------------------------------------------------------------------------------------------------------------------------------------------------------------------------------------------------------------------------------------------------------------------------------------------------------------------------------------------------------------------------------------------------------------------------|
| Aftenposten 20071109 | Aftenposten 20071109, Stormen kan vaere rester av orkanen Noel. Noel forsterket seg igjen over Atlantikhavet og besøkte Norge. Nina Loedemel, 09Nov2007, 1432local<br>-night 08-09Nov wspd up to hurricane strength on Utsira                                                                                                                                                                                                                                                                                                                                                                                                                                                                                                                                                                                                                                                                                                                                                            |
| Heyken (2007)        | Heyken, Herma, Schwere Sturmflut an niedersachsischer Nordseekuste - Dunnenabbruche auf den Inseln,<br>09/11/2007, NLWKN Niedersachsischer Landesbetrieb fuer Wasserwirtschaft, Kuesten- und Naturschutz.<br>-wind speed 80-110km/s 160km north of Emsmündung                                                                                                                                                                                                                                                                                                                                                                                                                                                                                                                                                                                                                                                                                                                            |
| KIT20071117          | KIT20071117, Sturm, Schnee, Regen. Mitteleuropa/Schwarzes Meer 09.-13.11.2007 (text CE), Karlsruhe Institute of Technology, Wettergefahren-Fruehwarnung, Institut fuer Meteorologie und Klimaforschung, Samstag, 17.November 2007, 18:00MEZ<br>-list of top 10 peak gusts 09-11Nov2007<br>-list of top 10 24h ppt accumulations 08-09Nov2007 to 11-12Nov2007<br>-list of snow heights Germany                                                                                                                                                                                                                                                                                                                                                                                                                                                                                                                                                                                            |
| LCW (20071123)       | Lloyd's Casualty Week, Weather and Navigation, pp17-20, Nov23/2007<br>-strongest gusts at Fair Isle between Orkney & Shetland Islands: 93mph                                                                                                                                                                                                                                                                                                                                                                                                                                                                                                                                                                                                                                                                                                                                                                                                                                             |
| Met Eireanne (2007)  | Met Eireann, Monthly Weather Bulletin, No.259, November 2007<br>-Simperopol, Crimean Peninsula Nov11: sustained wind speed=87km/h; gusts to 116km/h<br>-TAB page 4. Maximum wind speed & gust of the month with date/time<br>- FIG page 5. Time series data buoy M1; max wind speed Nov8 1800UTC 25 knot; max Hs Nov09 0200UTC 4m                                                                                                                                                                                                                                                                                                                                                                                                                                                                                                                                                                                                                                                        |
| Met Office (2007)    | Met Office, 2007. Daily Weather Summary, November 2007<br>-station reports of air temperature, pressure, wind speed & direction every 12h as symbols on map                                                                                                                                                                                                                                                                                                                                                                                                                                                                                                                                                                                                                                                                                                                                                                                                                              |
| MIROS-Ekofisk (2007) | MIROS, Ekofisk Monthly Report, November 2007. Doc No. ND/1024/07/11, Project: 1024-800 Ekofisk Met-Ocean Data Recording, Classification Open. Date 19December2007, prepared by AKS<br>-figure of time series wind speed, gust & wind direction (10min averages)<br>-figure of time series of 3h maximum wind speed, 3h maximum gust & air temperature<br>-figure of time series of dew point temperature, humidity, air pressure<br>-figure of time series of sea temperature & cloud level<br>-simple statistics: max wspd 23.0m/s 08Nov2007 14:00; max gust 29.0m/s 08Nov2007 15:40                                                                                                                                                                                                                                                                                                                                                                                                    |
| RWS (2007)           | RWS, Verslag van de Stormvloed van 9 november 2007 (SR88), Ministerie van Verkeer en Waterstaat, Directoraat-Generaal Rijkswaterstaat Waterdienst, Stormvloedwaarschuwingsdienst/SVSD, Postbus 17, 8200 AA Lelystad <a href="http://www.svsvd.nl">www.svsvd.nl</a> , Lelystad, november 2007, 45pp<br>-FIG1. Time series of wspd & wdir at platform K13 with dominant wdir at 330deg<br>-FIG1.1: TS wind speed & direction: Lichteiland Goeree: 19.5m/s 09Nov2007 05:00M?<br>-FIG1.2: TS wind speed & direction: Europlatform: 22m/s 09Nov2007 03:00M? (data gap)<br>-FIG1.3: TS wind speed & direction: Hoek van Holland: 22m/s 09Nov2007 01:00M? (data gap)<br>-FIG1.4: TS wind speed & direction: IJmuiden semafoor: 22m/s 09Nov2007 02:30M?, 2nd=11:00M? (data gap)<br>-FIG1.5: TS wind speed & direction: Platform K13A: 21.5m/s 09Nov2007 01:00M?, 2nd=06:00M?, 3rd=09:00M? (data gap)<br>-FIG1.6: TS wind speed & direction: Huibertgat: 23m/s 09Nov2007 06:30M? (major data gap) |

|                             |                                                                                                                                                                                                                                                                                                                                                                                                                                                                                                                                                                                                                                                                                                                                                                          |
|-----------------------------|--------------------------------------------------------------------------------------------------------------------------------------------------------------------------------------------------------------------------------------------------------------------------------------------------------------------------------------------------------------------------------------------------------------------------------------------------------------------------------------------------------------------------------------------------------------------------------------------------------------------------------------------------------------------------------------------------------------------------------------------------------------------------|
| Unwetterzentrale (2007)     | Unwetterzentrale, Randtif TILO, undated website, <a href="http://www.unwetterzentrale.de/uwz/299.html">http://www.unwetterzentrale.de/uwz/299.html</a> (accessed 01Sep2007)<br>Lowest central pressure in European area: 971hPa, 08Nov2007, 12UTC, northern North Sea<br>Chosen wind gusts over 75km/h (Mountain, Islands, or Coast)<br>-152km/h Nebelhorn<br>-141km/h Hiddensee-Dornbusch<br>-137km/h Wendelstein<br>-91km/h Nossen, Leck, Itzenhow (MM)<br>-87km/h Nuenchen-Giesling, Hohn<br>-85km/h Ansbach                                                                                                                                                                                                                                                          |
| Wiese (2007)                | Wiese, Heiko, Lebensgeschichte. Tiefdruckgebiet Tilo (getauft am 06.11.2007), written on 03Dec2007 <a href="http://www.met.fu-berlin.de/wetterpate/Lebensgeschichten/Tief_TILO_06_11_07.htm">http://www.met.fu-berlin.de/wetterpate/Lebensgeschichten/Tief_TILO_06_11_07.htm</a><br>-wspd 57km/h Stornaway<br>-high pressure gradient across Germany 40hPa between Rugen 990hPa & Saarland 1030hPa<br>-Berlin-Dahlem gusts up to 20.6m/s; avg wind speed 9.1m/s<br>-Brocken gusts up to 33m/s<br>-temperature decrease 3-5C                                                                                                                                                                                                                                              |
| Bancroft (2008)             | Bancroft, George P, Marine Weather Review - North Atlantic Area. September through December 2007, Mariners Weather Log, Vol 52, No 1, April 2008.<br>-listing wind speed for 3 buoys & 2 ships on Nov8/2007 12UTC                                                                                                                                                                                                                                                                                                                                                                                                                                                                                                                                                        |
| Eden (2008)                 | Eden, Philip, Weather Log, November 2007, Weather, 63(1), i-iv, 2008.<br>-peak gust of 81kt at Fair Isle                                                                                                                                                                                                                                                                                                                                                                                                                                                                                                                                                                                                                                                                 |
| Eecen (2008)                | Eecen PJ, Meteorological Measurements OWEZ. Half year report - 01-07-2007 - 31-12-2007, ECN-E--08-061, OWEZ_R_121_20070701-20071231_wind_resource_2007_2, Oct 2008 (47pp)<br>-OWEZ mast: max wspd 25-30 m/s; air temperature drop 12C to 4C; pressure drop 1040 to 1008 hPa                                                                                                                                                                                                                                                                                                                                                                                                                                                                                              |
| Lefebvre (2008)             | Lefebvre, Christiana, Orkan TILO am 8. und 9. November 2007, DWD report 01Jan2008<br>-FIG5. Time series wind speed of maximum gusts from 08Nov to the 09Nov2007: UFS DT Bucht, St Peter Ording, Norderney, Westermarkelsdorf, Boltenhagen, Arkona.<br>-FIG6. MAP: Wind direction & speed as 10min averages at midday on 09/11/2007 in knot<br>-FIG7. MAP: The highest wind gust in knot between 1015-1315 MEZ on 09/11/2007 (1 km/h is 1kt * 1.85)<br>-FIG8a.Hourly time series of 10min wspd & gusts in Nsea: UFS Dt Bucht, St. Peter Ording, Norderney<br>-FIG8b.Hourly time series of 10min wspd & gusts in Baltic: Westermarkelsdorf, Boltenhagen, Arkona<br>-TAB1. <b>Maximum gusts</b> for different stations on 09/11/2007 for North Sea, Baltic Sea & high areas |
| Outzen et al (2008)         | Outzen, O., K. Herklotz, H. Heinrich, C. Lefebvre, Extreme waves at FINO1 research platform caused by storm 'Tilo' on 9 November 2007, DEWI Magazin No. 33, August 2008.<br>-FIG4. Time series graphs of wind speed & wind direction for UFS Deutsche Bucht, St. Peter Ording, Norderney<br>-TABLE1: maximum gust values at 15 North Sea coastal stations                                                                                                                                                                                                                                                                                                                                                                                                                |
| Badewien et al (2009)       | Badewien TH, E Zimmer, A Bartheloma, R Reuter, Towards continuous long-term measurements of suspended particulate matter (SPM) in turbid coastal waters, Ocean Dynamics (2009) 59: 227-238, DOI 10.1007/s10236-009-0183-8<br>-wind speed during TILO at Bf 8<br>-FIG13c: time series wind speed at Station Watt for Nov 2007.                                                                                                                                                                                                                                                                                                                                                                                                                                            |
| Rosenthal and Lehner (2009) | Rosenthal W. and S Lehner, North Sea cases of extreme individual waves, 11.International Workshop on Wave Hindcasting and Forecasting & 2.Coastal Hazards Symposium, 2009?<br>-tabulated gust speeds for series of stations in the German Bight, North Sea area                                                                                                                                                                                                                                                                                                                                                                                                                                                                                                          |
| Magnusson (2011)            | Magnusson, Ann Karin, True sea state ...? Comparing different sensors and analyzing techniques, 12th Wave Workshop, Hawaii's Big Island, Oct.30-Nov4, 2011 (32 slides)                                                                                                                                                                                                                                                                                                                                                                                                                                                                                                                                                                                                   |

|                              |                                                                                                                                                                                                                                                                                                                                                           |
|------------------------------|-----------------------------------------------------------------------------------------------------------------------------------------------------------------------------------------------------------------------------------------------------------------------------------------------------------------------------------------------------------|
|                              | -time series wind speed & wind direction at Ekofisk                                                                                                                                                                                                                                                                                                       |
| Rosenthal et al (2011)       | Rosenthal W, AL Pleskachevsky, S Lehner, S Bruschi, Observation and modeling of high individual ocean waves and wave groups caused by a variable wind field, 12th International Workshop on Wave Hindcasting and Forecasting, Kohala Coast, Hawai'i, HI, 2011. -'... with maximum wind speeds of 120 km/h...'                                             |
| Magnusson and Donelan (2013) | Magnusson, AK and MA Donelan, The Andrea wave. Characteristics of a measured North Sea rogue wave, Journal of Offshore Mechanics and Arctic Engineering, 135, 1-10, 2013<br>-time series U10 & wind direction Ekofisk platform 08Nov2007 1200GMT to 10Nov2007 0000GMT<br>-max 10m wspd 23m/s                                                              |
| Donelan and Magnusson (2017) | Donelan MA & A-K Magnusson, The making of the Andrea Wave and other rogues, Scientific Reports, 7:44124, DOI: 10.1038/srep44124 (2017)<br>-wind quite steady at 22m/s for 7h at Ekofisk                                                                                                                                                                   |
| Larsen et al. (2017b)        | Larsen, XG et al, Extreme winds and waves for offshore turbines: Coupling atmosphere and wave modeling for design and operation in coastal zones, DTU Wind Energy, (DTU Wind Energy E, vol.154) (Final report for ForskEL project PSO-12020 X-WiWa), 2017b.<br>-Tilo max wspd at 100m at FINO1 is ~28.5 m/s (model); meas value covered by model (Fig 37) |
| Capellen email 25Sep1999     | Email from John Capellen DMI on 25Sep1999<br>-Skagen station 6041; 10-min avg wind speed 21m/s; just up to 32m/s around mid-day 09-10UTC<br>-map of analyzed wind speeds                                                                                                                                                                                  |

Table S16. Storm Tilo/Andrea: significant wave height and sea state (arranged by year and then alphabetically)

| Source                        | Full Reference and Notes                                                                                                                                                                                                                                                                                                                                                                                                                                                                                                                                                                                                                                                                    |
|-------------------------------|---------------------------------------------------------------------------------------------------------------------------------------------------------------------------------------------------------------------------------------------------------------------------------------------------------------------------------------------------------------------------------------------------------------------------------------------------------------------------------------------------------------------------------------------------------------------------------------------------------------------------------------------------------------------------------------------|
| Guardian (20071112)           | The Guardian, Environmental disaster as Russian tanker sinks, Mon, 2007/11/12, 09:18 GMT (reporter: Luke Harding, Moscow)<br>-SWH 6m at time of Black Sea ship disaster                                                                                                                                                                                                                                                                                                                                                                                                                                                                                                                     |
| Kustwachtcentrum (2007/11/06) | Kustwachtcentrum Den Helder, Containers verloren, Persbericht 06Nov2007, emailed from Edwin Granneman 08Oct2008<br>-Hs 3-4m at 1330 06Nov2007, 14km N of Terschelling at time of lost containers                                                                                                                                                                                                                                                                                                                                                                                                                                                                                            |
| Met Eireann (2007)            | Met Eireann, Monthly Weather Bulletin, No.259, November 2007<br>- FIG page 5. Time series data buoy M1; max wind speed Nov8 1800UTC 25 knot; max Hs Nov09 0200UTC 4m                                                                                                                                                                                                                                                                                                                                                                                                                                                                                                                        |
| MIROS-Ekofisk (2007)          | MIROS, Ekofisk Monthly Report, November 2007. Doc No. ND/1024/07/11, Project: 1024-800 Ekofisk Met-Ocean Data Recording, Classification Open. Date 19December2007, prepared by AKS<br>-time series of significant wave height H1/3; average wave period Tz; maximum wave height Hmax<br>-simple statistics: significant wave height [9.6,9.3,8.6]; maximum wave height [16.1,12.8,13.9]                                                                                                                                                                                                                                                                                                     |
| Lefebvre (2008)               | Lefebvre, Christiana, Orkan TILO am 8. und 9. November 2007, DWD report 01Jan2008<br>-mention that Britta wave that damaged FINO1 >10m<br>FIG9. Time series Hs for Helgoland & Nordseeboje 01.01.2007 to 28.12.2007                                                                                                                                                                                                                                                                                                                                                                                                                                                                         |
| RWS (2007)                    | RWS, Verslag van de Stormvloed van 9 november 2007 (SR88), Ministerie van Verkeer en Waterstaat, Directoraat-Generaal Rijkswaterstaat Waterdienst, Stormvloedwaarschuwingsdienst/SVSD, Postbus 17, 8200 AA Lelystad <a href="http://www.svsnl.nl">www.svsnl.nl</a> , Lelystad, november 2007, 45pp<br>-FIG8.1. TS wave height & direction Europlatform: maxhgt=6m, datetime=09Nov 0800, P=9.4s<br>-FIG8.2. TS wave height & direction IJmuiden: maxhgt=8m, datetime=09Nov 1330, P=12.2s (data gap)<br>-FIG8.3. TS wave height & direction Eierlandse Gat: maxhgt=7.4m,datetime=09Nov 1000, P=12.1s<br>-FIG8.4. TS wave height & direction Schiermonnikoog Noord: maxhgt=8.2m,datetime=09Nov |

|                              |                                                                                                                                                                                                                                                                                                                                                                                                          |
|------------------------------|----------------------------------------------------------------------------------------------------------------------------------------------------------------------------------------------------------------------------------------------------------------------------------------------------------------------------------------------------------------------------------------------------------|
|                              | 1230, P=14.6s (data gap)                                                                                                                                                                                                                                                                                                                                                                                 |
| Magnusson et al (2008)       | Magnusson, A.K., J. Johannessen, K.-F. Dagestad, O. Breivik, O.J. Aarnes, B. Furevik, Bolgestrom interaksjon til nytte for oljeindustri, WACUSAR_sluttrapport.doc, 19/12/2008<br>-Hs up to 11m at Ekofisk during TILO<br>-Hs7m at FOBOX waverider near Karmoy                                                                                                                                            |
| Outzen et al (2008)          | Outzen, O., K. Herklotz, H. Heinrich, C. Lefebvre, Extreme waves at FINO1 research platform caused by storm 'Tilo' on 9 November 2007, DEWI Magazin No. 33, August 2008.<br>-max Hs 10.5m for WAMOS radar & ADCP systems about 12:00 MEZ<br>-time series graphs of WAMOS radar & ADCP 01-17Nov 2007<br>-maximum period WAMOS 15.9s, ADCP 14.3s; for 32m water depth wavelengths 257m & 228m              |
| Magnusson (2009)             | Magnusson, A.K., Forecasting extreme waves in practice, Proceedings Rogue waves 2008, ed. by Michel Olagnon and Marc Previsto, Brest, France, 13-15 Oct., 2008. <a href="http://www.ifremer.fr/web-com/stw2008/rw">http://www.ifremer.fr/web-com/stw2008/rw</a> (pdf date stamp May 19,2009).<br>-Ekofisk maximum Hs=10.95m during Tilo<br>-time series Hs at Ekofisk                                    |
| Magnusson (2009b)            | Magnusson AK, 2009, What is true sea state, Proceedings of the 11th International Workshop on Wave Hindcasting and Forecasting and Coastal Hazard Symposium, JCOMM Halifax, Canada, Oct 18-23, 2009, Technical Report No 52, WMO/TD-No. 1533, IOC Workshop Report No. 232.<br>-time series Hs Ekofisk                                                                                                    |
| Rosenthal and Lehner (2009)  | Rosenthal W. and S Lehner, North Sea cases of extreme individual waves, 11.International Workshop on Wave Hindcasting and Forecasting & 2.Coastal Hazards Symposium, 2009?<br>-maximum Hs FINO1 ~11m measured by WAMOS & AWAC                                                                                                                                                                            |
| Gray et al (2011)            | Gray AL, O Martinez-Avarado, LH Baker, PA Clark, Conditional symmetric instability in sting-jet storms, QJRMS, 137, 1482-1500, 2011<br>-mention of extreme waves in North Sea                                                                                                                                                                                                                            |
| Hessner (2011)               | Hessner, K., Extreme wave analysis at FINO1 during TILO storm event Nov. 8-9, 2007, Ocean WaveS GmbH data report for DONG Energy Power A/S, OceanWaveS GmbH, Hansekontor, Vor dem Bardowicker Tore 6b, 21339 Luneburg, Germany, July 2011<br>-FIG7: time series WAMOSII & AWAC data: Hs, peak period, & peak wave direction<br>-peak AWAC Hs=10.81 09Nov 08:02UTC; peak WAMOS II Hs=10.7m 09Nov 11:27UTC |
| Magnusson (2011)             | Magnusson, Ann Karin, True sea state ...? Comparing different sensors and analyzing techniques, 12th Wave Workshop, Hawaii's Big Island, Oct.30-Nov4, 2011 (32 slides)<br>-maximum Hs from LASAR at 11.5m; minimum Hs from MRF at 9.7m<br>-time series of Hs & Tp<br>-wave spectrum snapshots and polar diagrams at 08 Nov (1200, 1500, 1800 UTC) and 09 Nov (0000UTC)<br>-time series of Andrea wave    |
| Rosenthal et al (2011)       | Rosenthal W, AL Pleskachevsky, S Lehner, S Bruschi, Observation and modeling of high individual ocean waves and wave groups caused by a variable wind field, 12th International Workshop on Wave Hindcasting and Forecasting, Kohala Coast, Hawaii, HI, 2011.<br>-‘... significant wave heights in excess of 10m, wave periods of about 15s and wave lengths of more than 220m.’                         |
| Magnusson and Donelan (2013) | Magnusson, AK and MA Donelan, The Andrea wave. Characteristics of a measured North Sea rogue wave, Journal of Offshore Mechanics and Arctic Engineering, 135, 1-10, 2013<br>-time series Hs & Tp platform 08Nov2007 1200GMT to 10Nov2007 0000GMT; max Hs=11m at 0630 GMT                                                                                                                                 |
| Donelan and Magnusson (2017) | Donelan MA & A-K Magnusson, The making of the Andrea Wave and other rogues, Scientific Reports, 7:44124, DOI: 10.1038/srep44124 (2017)<br>-‘Hs increased from 9m to 10.5m’                                                                                                                                                                                                                               |
| Larsen et al. (2017a)        | Larsen XG, J Du, R Bolanos, S Larsen, On the impact of wind on the development of wave field during storm Britta, Ocean Dynamics, 67, 1407-1427, 2017a.<br>-Hs=10.1m at FINO1 (AWAC); greater then 9.8m during Britta; highest on record; 20y return                                                                                                                                                     |

|                      |                                                                                                                                                                                                                                                                                                                                                 |
|----------------------|-------------------------------------------------------------------------------------------------------------------------------------------------------------------------------------------------------------------------------------------------------------------------------------------------------------------------------------------------|
|                      | value                                                                                                                                                                                                                                                                                                                                           |
| Larsen et al (2017b) | Larsen, XG et al, Extreme winds and waves for offshore turbines: Coupling atmosphere and wave modeling for design and operation in coastal zones, DTU Wind Energy, (DTU Wind Energy E, vol.154) (Final report for ForskEL project PSO-12020 X-WiWa), 2017b<br>-FIG.54: Horns Rev Buoy N maximum Hs during Tilo is 5.4m (meas) & 6.1m (modelled) |

Table S17. Storm Tilo/Andrea: storm trajectory map (arranged by year and then alphabetically)

| Source                 | Full Reference and Notes                                                                                                                                                                                                                                                                         |
|------------------------|--------------------------------------------------------------------------------------------------------------------------------------------------------------------------------------------------------------------------------------------------------------------------------------------------|
| RWS (2007)             | RWS, Verslag van de Stormvloed van 9 november 2007 (SR88), Ministerie van Verkeer en Waterstaat, Directoraat-Generaal Rijkswaterstaat Waterdienst, Stormvloedwaarschuwingsdienst/SVSD, Postbus 17, 8200 AA Lelystad <a href="http://www.svvd.nl">www.svvd.nl</a> , Lelystad, november 2007, 45pp |
| Lefebvre (2008)        | Lefebvre, Christiana, Orkan TILO am 8. und 9. November 2007, DWD report 01Jan2008                                                                                                                                                                                                                |
| Kristandt et al (2014) | Kristandt, J, B Brecht, H Frank, H Knaack, Optimization of empirical storm surge forecast – modelling of high resolution wind fields, Die Kuste, 18, 301-308, 2014<br>-trajectories of 6 most serious storms in terms of Norderney storm surge levels.                                           |
| Hart et al (2017)      | Hart NCG, SL Gray, PA Clark, Sting-jet windstorms over the North Atlantic: climatology and contribution to extreme wind risk, Journal of Climate, 30, pp 545-5471, 2017                                                                                                                          |

Table S18. Storm Tilo/Andrea: coastal flooding and evacuations (arranged by year and then alphabetically)

| Source                    | Full Reference and Notes                                                                                                                                                                                                                                                                                                                                                                                                                                                                                                      |
|---------------------------|-------------------------------------------------------------------------------------------------------------------------------------------------------------------------------------------------------------------------------------------------------------------------------------------------------------------------------------------------------------------------------------------------------------------------------------------------------------------------------------------------------------------------------|
| BBC (20071109a)           | BBC, North Sea flood tide fears recede, Fri 09 November 2007, 1033GMT<br>-night of Nov8-9 1000s evacuated in England in preparation of 3m skew surge<br>-500 people spent night at refuge centres in local schools<br>-tides peaked 0700-0800GMT; no major breaches of flood defenses<br>-Great Yarmouth not flooded substantially; surge peak 20cm lower than expected<br>-surveillance operations to continue along northern Dutch coast; 1/3 country under sea level<br>-Germany flood warnings for Elbe & Elm(sp?) rivers |
| BBC (20071109b)           | BBC, Thousands go home after tide fear, Friday 9 November, 16:50GMT<br>-map flood risk from Immingham to Felixstowe<br>-flood defenses Great Yarmouth breached<br>-rail line Norwich-Lowestoft flooded<br>-1000's return home                                                                                                                                                                                                                                                                                                 |
| Horsburgh (2007)          | Horsburgh, Kevin, Foreword, in Bradshaw, Elizabeth (ed), Annual Report for 2007 for the UK National Tide Gauge Network and Related Sea Level Science, National Tide and Sea Level Facility, NERC 100017897 2007, p.2<br>-worst storm surge in 50y<br>-local minor flooding Lowestoft<br>-storm surge forecast in real time                                                                                                                                                                                                    |
| LCW (20071123)            | Lloyd's Casualty Week, Weather and Navigation, pp17-20, Nov23/2007<br>-100s people evacuated from low areas of eastern England<br>-Great Yarmouth closed to traffic as Yare River rose nearly to bridge surface; defences breached in town centre                                                                                                                                                                                                                                                                             |
| North Norfolk News (2007) | North Norfolk News, Surge floods prompt new erosion fears, 14 November 2007, 01:00, Happisburgh Village Website, <a href="http://www.happisburgh.org.uk/press/nnn141107.html">http://www.happisburgh.org.uk/press/nnn141107.html</a><br>-20 houses flooded Walcott; waves over sea wall<br>-families sought shelter other places                                                                                                                                                                                              |
| RWS (2007)                | RWS, Verslag van de Stormvloed van 9 november 2007 (SR88), Ministerie van Verkeer en Waterstaat, Directoraat-Generaal Rijkswaterstaat Waterdienst, Stormvloedwaarschuwingsdienst/SVSD, Postbus 17, 8200 AA Lelystad <a href="http://www.svvd.nl">www.svvd.nl</a> , Lelystad, november 2007, 45pp<br>-dike watch on entire coast for first time since 1976                                                                                                                                                                     |
| Tagesspiegel              | Der Tagesspiegel, Orkan 'Tilo'. Duenenabbruch kostet Helgoland Millionen, 09/11/2007,                                                                                                                                                                                                                                                                                                                                                                                                                                         |

|                                 |                                                                                                                                                                                                                                                                                                                                                                                                                                                                                               |
|---------------------------------|-----------------------------------------------------------------------------------------------------------------------------------------------------------------------------------------------------------------------------------------------------------------------------------------------------------------------------------------------------------------------------------------------------------------------------------------------------------------------------------------------|
| (2007)                          | 16:55 (mit AFP/ddp)<br>-500 people evacuated overnight from eastern England; Great Yarmouth streets under water<br>-Hamburg flooding: Fischmarkt, Speicherstadt, Hafen-City                                                                                                                                                                                                                                                                                                                   |
| Upstream20071109_wells          | Upstream, Rob Wells, 09Nov2007, Passing storm keeps platforms shut<br>-England east coast storm surge 20cm lower than expected                                                                                                                                                                                                                                                                                                                                                                |
| Eden (2008)                     | Eden, Philip, Weather Log, November 2007, Weather, 63(1), i-iv, 2008.<br>-coastal flooding was very limited in eastern England                                                                                                                                                                                                                                                                                                                                                                |
| Lefebvre (2008)                 | Lefebvre, Christiana, Orkan TILO am 8. und 9. November 2007, DWD report 01Jan2008<br>-bank areas flooded in Emden, Bremerhaven, Hamburg                                                                                                                                                                                                                                                                                                                                                       |
| Piotkowitz and Soerensen (2008) | Piotkowitz, Thorsten & Carlo Soerensen, Consequences of Climate Change along the Danish Coasts, Safecoast Action 5A, Danish Coastal Authority, Hojbovej 1, 7600 Lemvig, Denmark, <a href="mailto:kdi@kyst.dk">kdi@kyst.dk</a> , December 2008<br>-Tilo was one of 20 Danish storm surges 1991-2008 acknowledged for compensation by the Danish Storm Council (DSC)                                                                                                                            |
| POL (2009)                      | POL, Annual Report 2007-2008, Proudman Oceanographic Laboratory, 40pp, 13May2009<br>-minor flooding Lowestoft                                                                                                                                                                                                                                                                                                                                                                                 |
| MetOffice (2011/05/11)          | MetOffice, Storm surge - November 2007, Met office website last updated 11May2011. <a href="https://www.metoffice.gov.uk/about-us/who/how/case-studies/floods-2007">https://www.metoffice.gov.uk/about-us/who/how/case-studies/floods-2007</a> .<br>-water level 10cm below sea wall Great Yarmouth<br>-number of minor floods in Norfolk & Suffolk<br>-breach of sea defenses in Suffolk<br>-no loss of life; some damage to property.<br>-offshore winds meant that waves were not an issue |
| Environment Agency (2012)       | Environment Agency, Thames Barrier Project Pack 2012, Environment Agency<br>-no damage to people or property behind the Thames Barrier; flood contained in estuary                                                                                                                                                                                                                                                                                                                            |
| Esurge_2007_tilo (2012)         | Esurge_2007_tilo (2012), North Sea surge (2007) by Phillip Harwood 2012/11/01 18:00<br>-maximum storm surge in UK at Lowestoft<br>-‘number of minor breaches in Norfolk & Suffolk with some damage to property’<br>-Netherlands; ‘first ever operational closure of the Maeslantkering, but no significant flooding resulted’<br>-Germany: flooding recorded                                                                                                                                  |
| AON Benfield (2013)             | AON Benfield, Historie von 1703 bis 2012: Winterstuerme in Europe, Stand: Januar 2013<br>-500 people evacuated eastern England<br>-several streets in Great Yarmouth under water                                                                                                                                                                                                                                                                                                              |
| WIKI20180324                    | WIKI, Liste der Sturmfluten an der Nordsee, copied 2018/03/24, <a href="https://de.wikipedia.org/wiki/Liste_der_Sturmfluten_an_der_Nordsee">https://de.wikipedia.org/wiki/Liste_der_Sturmfluten_an_der_Nordsee</a><br>-worst flooding in Hamburg since 1900                                                                                                                                                                                                                                   |

Table S19. Storm Tilo/Andrea: surge reports and quantitative water levels (arranged by year and then alphabetically)

| Source          | Full Reference and Notes                                                                                                                                                                                                                                                                                                                                                                                                                                                 |
|-----------------|--------------------------------------------------------------------------------------------------------------------------------------------------------------------------------------------------------------------------------------------------------------------------------------------------------------------------------------------------------------------------------------------------------------------------------------------------------------------------|
| Bradshaw (2007) | Bradshaw, Elizabeth (ed), Annual Report for 2007 for the UK National Tide Gauge Network and Related Sea Level Science, National Tide and Sea Level Facility, NERC 100017897 2007<br>-monthly min/max for absolute water levels & skew surges<br>-reference points for UK tide gauges                                                                                                                                                                                     |
| Heyken (2007)   | Heyken, Herma, Schwere Sturmflut an niedersächsischer Nordseeküste - Dunnenabbrüche auf den Inseln, 09/11/2007, NLWKN Niedersächsischer Landesbetrieb fuer Wasserwirtschaft, Kuesten- und Naturschutz.<br>-max skew surge: Norderney (2.55m), Langeoog (2.53m), Spiekeroog (2.58m), Wangerooge (2.63m), Knock (3.11m), Emden (3.29m), Emssperrwerk (3.44m), Leyhoern (2.78m), Benserziel (2.76m), Leuchtturm Alte Weser (2.46m), Wilhelmshaven (3.08m), Cuxhaven (2.91m) |



|                       |                                                                                                                                                                                                                                                                                                                                                                                                                                                                                                                                                                                                                                                                                                                                                                                                                                                                                                                                                                                                                                                                |
|-----------------------|----------------------------------------------------------------------------------------------------------------------------------------------------------------------------------------------------------------------------------------------------------------------------------------------------------------------------------------------------------------------------------------------------------------------------------------------------------------------------------------------------------------------------------------------------------------------------------------------------------------------------------------------------------------------------------------------------------------------------------------------------------------------------------------------------------------------------------------------------------------------------------------------------------------------------------------------------------------------------------------------------------------------------------------------------------------|
|                       | -Dike watch on Ostfriesen islands                                                                                                                                                                                                                                                                                                                                                                                                                                                                                                                                                                                                                                                                                                                                                                                                                                                                                                                                                                                                                              |
| KIT20071117           | KIT20071117, Sturm, Schnee, Regen. Mitteleuropa/Schwarzes Meer 09.-13.11.2007 (text CE), Karlsruhe Institute of Technology, Wettergefahren-Fruehwarnung, Institut fuer Meteorologie und Klimaforschung, Samstag, 17.November 2007, 18:00MEZ<br>-skew surge Hamburg 3.33m uMThw                                                                                                                                                                                                                                                                                                                                                                                                                                                                                                                                                                                                                                                                                                                                                                                 |
| Met Office (2007)     | Met Office, 2007. Daily Weather Summary, November 2007<br>-east coast skew surge reported at 2-2.5m                                                                                                                                                                                                                                                                                                                                                                                                                                                                                                                                                                                                                                                                                                                                                                                                                                                                                                                                                            |
| RWS (2007)            | RWS, Verslag van de Stormvloed van 9 november 2007 (SR88), Ministerie van Verkeer en Waterstaat, Directoraat-Generaal Rijkswaterstaat Waterdienst, Stormvloedwaarschuwingsdienst/SVSD, Postbus 17, 8200 AA Lelystad <a href="http://www.svsd.nl">www.svsd.nl</a> , Lelystad, november 2007, 45pp<br>FIG7.1. Time series water level, tide, surge for Vlissingen 08Nov 1200-09Nov 1200; surge=2.5m, meas=3.65m, tide=2.25m<br>FIG7.2. Time series water level, tide, surge for Roompot buiten 08Nov 1200-09Nov 1200; surge=2.5m, meas=2.6 m, tide=1.7m<br>FIG7.3. Time series water level, tide, surge for Hoek van Holland 08Nov 1200-09Nov 1200; surge=2.0m, meas=3.15m, tide=2.0m<br>FIG7.4. Time series water level, tide, surge for Den Helder 08Nov 1200-09Nov 1200; surge=2.0m, meas=2.7m, tide=0.8m<br>FIG7.5. Time series water level, tide, surge for Hoek van Holland 08Nov 1200-09Nov 1200; surge=2.6m, meas=2.6m, tide=1.2m<br>FIG7.6. Time series water level, tide, surge for Den Helder 08Nov 1200-09Nov 1200; surge=2.7m, meas=4.2m, tide=1.5m |
| Tagesspiegel (2007)   | Der Tagesspiegel, Orkan 'Tilo'. Duenenabbruch kostet Helgoland Millionen, 09/11/2007, 16:55 (mit AFP/ddp)<br>-Hamburg skew surge 3.30m; absolute water level 5.42m uNN<br>-Helgoland skew surge 2.50m; absolute level 3.70m uNN<br>-Gandersum skew surge 3.44m<br>-Emden skew surge 3.29m<br>-Wilhelmshaven skew surge 3.08m                                                                                                                                                                                                                                                                                                                                                                                                                                                                                                                                                                                                                                                                                                                                   |
| Heyken (2008)         | Heyken, Herma, 15 Sturmfluten sind keine Boten des Klimawandels, in Herma Heyken (ed), Jahresbericht 2007, NLWKN Niedersaechsischer Landesbetrieb fuer Wasserwirtschaft, Kuesten- und Naturschutz, pp14-15, Norden, April, 2008<br>-Norderney skew surge level: 09Nov2007: 2.55m; 01Nov2006: 2.55m; 12Jan2007: 2.16m; 18Mar2007: 2.16m                                                                                                                                                                                                                                                                                                                                                                                                                                                                                                                                                                                                                                                                                                                         |
| Lefebvre (2008)       | Lefebvre, Christiana, Orkan TILO am 8. und 9. November 2007, DWD report 01Jan2008<br>-skew surge Helgoland 2.50 MThw<br>-skew surge Emssperrwerke 3.28m MThw<br>-skew surge Hamburg ~3.30m MThw; absolute level 5.42m over Normalnull                                                                                                                                                                                                                                                                                                                                                                                                                                                                                                                                                                                                                                                                                                                                                                                                                          |
| Outzen et al (2008)   | Outzen, O., K. Herklotz, H. Heinrich, C. Lefebvre, Extreme waves at FINO1 research platform caused by storm 'Tilo' on 9 November 2007, DEWI Magazin No. 33, August 2008.<br>-max water level=32.7m<br>-skew surge 2.8m above mean high tide (29.9m)<br>-4.7m above chart datum (28.0m at FINO1)                                                                                                                                                                                                                                                                                                                                                                                                                                                                                                                                                                                                                                                                                                                                                                |
| Badewien et al (2009) | Badewien TH, E Zimmer, A Bartheloma, R Reuter, Towards continuous long-term measurements of suspended particulate matter (SPM) in turbid coastal waters, Ocean Dynamics (2009) 59: 227-238, DOI 10.1007/s10236-009-0183-8<br>-FIG13b: time series water level at Station Watt                                                                                                                                                                                                                                                                                                                                                                                                                                                                                                                                                                                                                                                                                                                                                                                  |
| POL (2009)            | POL, Annual Report 2007-2008, Proudman Oceanographic Laboratory, 40pp, 13May2009<br>-Sheerness: max surge=2.3m; surge at hightide1=0.9m; surge at hightide2=1.0m<br>-Lowestoft: max surge 2.1m; surge at hightide1=0.7m; surge at hightide2=1.7m                                                                                                                                                                                                                                                                                                                                                                                                                                                                                                                                                                                                                                                                                                                                                                                                               |
| Reuter et al (2009)   | Reuter R, TH Badewien, A Bartheloma, A Braun, A Luebben, J Rullkoetter, A hydrographic time series station in the Wadden Sea (southern North Sea), Ocean Dynamics, DOI 10.1007/s10236-009-0196-3, 2009<br>-absolute water level & derived skew surge                                                                                                                                                                                                                                                                                                                                                                                                                                                                                                                                                                                                                                                                                                                                                                                                           |

|                           |                                                                                                                                                                                                                                                                                                                                                                                                                                                          |
|---------------------------|----------------------------------------------------------------------------------------------------------------------------------------------------------------------------------------------------------------------------------------------------------------------------------------------------------------------------------------------------------------------------------------------------------------------------------------------------------|
| Gonnert and Buss (2009)   | Goennert, Gabriele & Thomas Buss, Sturmfluten zur Bemessung von Hochwasserschutzanlagen, Berichte des Landesbetriebes Strassen, Bruecken und Gewaesser Nr.2/2009, Freie und Hansestadt Hamburg, Landesbetrieb Strassen, Bruecken und Gewaesser, Hamburg, ISSN 1867-7959<br>-Cuxhaven max water level 944cm (NN=500cm); maximum surge 279cm; high tide 676cm (NN=500cm)<br>-Time series graph of the water levels & surge levels at Cuxhaven              |
| Herrling et al (2010)     | Herrling, Gerald, Heiko Knaack, Ralf Kaiser, Hanz D. Niemayer, Evaluation of design water levels at the Ems-Dollard estuary considering the effect of a storm surge barrier, Coastal Engineering 2010.<br>-time series water level at Emden<br>-maximum water levels along Ems-Dollard estuary                                                                                                                                                           |
| Environment Agency (2012) | Environment Agency, Thames Barrier Project Pack 2012, Environment Agency<br>-Sheerness true surge +2.39m<br>-Sheerness resultant tide (total water level NN=0m?) 3.73m & 3.58m (successive semi-diurnal tides)                                                                                                                                                                                                                                           |
| Zorndt et al (2012)       | Zorndt AC, T Schlurmann, I Grabemann The influence of extreme events on hydrodynamics and salinities in the Weser estuary in the context of climate impact research, Coastal Engineering 2012.[document date stamp 11Oct2012]<br>-figure of water levels for 20days for Leuchtturm Alte Weser and Bremerhaven Alte Leuchtturm                                                                                                                            |
| AON Benfield (2013)       | AON Benfield, Historie von 1703 bis 2012: Winterstuerme in Europe, Stand: Januar 2013<br>-Hamburg storm surge 3.33m<br>-storm surge German coast 2.3-3.3m                                                                                                                                                                                                                                                                                                |
| Loewe (2013)              | Loewe,P, Atmosphaerenphysik, pp37-114, System Nordsee. 2006 & 2007: Zustand und Entwicklungen, ed. by P. Loewe, H. Klein, S. Welgelt-Krenz, Berichte des Bundesamtes fuer Seeschiffahrt und Hydrographie, Nr.49/2013<br>-Cuxhaven skew surge during TILO: 290cm                                                                                                                                                                                          |
| Kristandt et al (2014)    | Kristandt, J., B. Brecht, H. Frank, H. Knack, Optimization of empirical storm surge forecast-modeling of high resolution wind fields, Die Kuste, 81, 301-348, 2014<br>-Norderney skew surge 255cm<br>-comparison with other storms at Norderney                                                                                                                                                                                                          |
| VH (2016)                 | Vlaamse Hydrografie, Overzicht van de tijwaarnemingen langs de Belgische kust. Periode 2001-2010 voor Nieuwpoort, Oostende en Zeebrugge, Ministerie van de Vlaamse Gemeenschap, Agentschap Maritieme Dienstverlening en Kust, Afdeling Kust, Vlaamse Hydrografie, Oostende, 38pp, document time stamp 24Feb2016, author='beirenro'<br>-quantitative wave levels & high tide levels for Nieuwpoort, Oostende & Zeebrugge<br>-skew surge can be calculated |
| Herrling et al (2017)     | Herrling G, Benninghoff, Zorndt A, Winter C, Drivers of channel-shoal morphodynamics at the outer Weser estuary, Coastal Dynamics 2017, Paper No. 261, pp.333-345<br>-time series graph of water level at Bremerhaven Alter Leuchtturm<br>-statement that water levels at Bremerhaven Alter Leuchtturm reached 4.75m                                                                                                                                     |
| Jensen et al (2017)       | Jensen J, S Niehuser, A Arns, S Dangendorf, Sensor- und risikobasiertes Fruhwarn-system fuer Seedeiche (EarlyDike), API - Sturmflutmonitoring und Sturmflutssimulator - Fachbericht 2016, Siegen, April 2017<br>-Tilo storm residual time series for Cuxhaven shown in FIG4-4 with maximum value ~2.7m                                                                                                                                                   |
| WIKI20180324              | WIKI, Liste der Sturmfluten an der Nordsee, copied 2018/03/24,<br><a href="https://de.wikipedia.org/wiki/Liste_der_Sturmfluten_an_der_Nordsee">https://de.wikipedia.org/wiki/Liste_der_Sturmfluten_an_der_Nordsee</a><br>-water levels: St Pauli NN+5.42m; CuxhavenNN+4.44m (Windstau 2.79m)                                                                                                                                                             |

Table S20. Storm Tilo/Andrea: surge barrier closures (arranged by year and then alphabetically)

| Source          | Full Reference and Notes                                              |
|-----------------|-----------------------------------------------------------------------|
| BBC (20091109a) | BBC, North Sea flood tide fears recede, Fri 09 November 2007, 1033GMT |

|                           |                                                                                                                                                                                                                                                                                                                                                                                                                                                             |
|---------------------------|-------------------------------------------------------------------------------------------------------------------------------------------------------------------------------------------------------------------------------------------------------------------------------------------------------------------------------------------------------------------------------------------------------------------------------------------------------------|
|                           | <p>-Thames Barrier already being rain 1000GMT 09Nov2007</p> <p>-Maeslant barrier closed at Rotterdam (Europe's largest port) for first time since construction 1990s</p> <p>-1/2h for barrier doors to close</p> <p>-barrier to remain closed until 1700</p>                                                                                                                                                                                                |
| BBC (20091109b)           | <p>BBC, Thousands go home after tide fear, Friday 9 November, 16:50GMT</p> <p>-Thames barrier closed for main storm tide &amp; next one</p> <p>-Rotterdam giant storm surge barrier closed for first time</p>                                                                                                                                                                                                                                               |
| Heyken (2007)             | <p>Heyken, Herma, Schwere Sturmflut an niedersachsischer Nordseekuste - Dunnenabbruche auf den Inseln,</p> <p>09/11/2007, NLWKN Niedersachsischer Landesbetrieb fuer Wasserwirtschaft, Kuesten- und Naturschutz.</p> <p>-Emssperrwerk bei Gandersum in Landkreis Leer closed Friday morning</p>                                                                                                                                                             |
| Horsburgh (2007)          | <p>Horsburgh, Kevin, Foreword, in Bradshaw, Elizabeth (ed), Annual Report for 2007 for the UK National Tide Gauge Network and Related Sea Level Science, National Tide and Sea Level Facility, NERC 100017897 2007, p.2</p> <p>-accurate water level forecasts to within 8cm for Sheerness</p> <p>-Sheerness predictions important for Thames barrier</p>                                                                                                   |
| LCW (20071123)            | <p>Lloyd's Casualty Week, Weather and Navigation, pp17-20, Nov23/2007</p> <p>-Maeslantkering closed for first time since opening 2007</p> <p>-Thames barrier closed as precaution</p>                                                                                                                                                                                                                                                                       |
| RWS (2007)                | <p>RWS, Verslag van de Stormvloed van 9 november 2007 (SR88), Ministerie van Verkeer en Waterstaat, Directoraat-Generaal Rijkswaterstaat Waterdienst, Stormvloedwaarschuwingsdienst/SVSD, Postbus 17, 8200 AA Lelystad <a href="http://www.svsd.nl">www.svsd.nl</a>, Lelystad, november 2007, 45pp</p> <p>-barriers closed: Oosterscheldekering, Maeslantkering, Hartelkering</p> <p>-barrier remaining open: Stormvloedkering in de Hollandsche IJssel</p> |
| Tagesspiegel (2007)       | <p>Der Tagesspiegel, Orkan 'Tilo'. Duenenabbruch kostet Helgoland Millionen, 09/11/2007, 16:55 (mit AFP/ddp)</p> <p>-Maeslant barrier closed for first time since construction 1997</p> <p>-all storm barriers in Netherlands closed</p> <p>-dyke gates &amp; protection closed in Germany</p>                                                                                                                                                              |
| Lefebvre (2008)           | <p>Lefebvre, Christiana, Orkan TILO am 8. und 9. November 2007, DWD report 01Jan2008</p> <p>-12 surge defences in Niedersachsen closed, including Emssperrwerke</p> <p>-Netherlands closed Rotterdam surge defence, opened in 1997.</p>                                                                                                                                                                                                                     |
| Herrling et al (2010)     | <p>Herrling, Gerald, Heiko Knaack, Ralf Kaiser, Hanz D. Niemayer, Evaluation of design water levels at the Ems-Dollard estuary considering the effect of a storm surge barrier, Coastal Engineering 2010.</p> <p>-Gandersum surge barrier closed during Tilo</p>                                                                                                                                                                                            |
| Groen and Cairns (2011a)  | <p>Groen, Geert and Cairns, Sofia, Storm Catalog The Netherlands, nov 2011, KNMI/Deltares. <a href="http://projects.knmi.nl/hydra/stormcatalogus/index.htm">http://projects.knmi.nl/hydra/stormcatalogus/index.htm</a> (accessed 15June2019 after being placed back online by Josine Camps)</p> <p>-first operational closure of Nieuwe Waterweg &amp; Maeslantkering</p>                                                                                   |
| Groen and Cairns (2011b)  | <p>Groen Geert &amp; Cairns Sofia, Summary 09-11-2007, nov 2011b, KNMI/Deltares. <a href="http://projects.knmi.nl/hydra/stormcatalogus/Cases/05_09-11-2007/Samenvatting/samenvatting.html">http://projects.knmi.nl/hydra/stormcatalogus/Cases/05_09-11-2007/Samenvatting/samenvatting.html</a></p> <p>-first operational closure of Nieuwe Waterweg &amp; Maeslantkering</p>                                                                                |
| Environment Agency (2012) | <p>Environment Agency, Thames Barrier Project Pack 2012, Environment Agency</p> <p>-Thames Barrier activated; construction completed 1983, opened May 1984</p>                                                                                                                                                                                                                                                                                              |
| Esurge_2007_tilo (2012)   | <p>Esurge_2007_tilo (2012), North Sea surge (2007) by Phillip Harwood 2012/11/01 18:00</p> <p>-first operational closure of Maeslantkering in the Netherlands</p>                                                                                                                                                                                                                                                                                           |
| Zorndt et al (2012)       | <p>Zorndt AC, T Schlurmann, I Grabemann The influence of extreme events on hydrodynamics and salinities in the Weser estuary in the context of climate impact research, Coastal Engineering 2012.[document date stamp 11Oct2012]</p> <p>-Britta 2006 &amp; Tilo 2007 storm surges did not cause any losses because of high level of</p>                                                                                                                     |

|                                    |                                                                                                                                                                                                                                                                                                                                           |
|------------------------------------|-------------------------------------------------------------------------------------------------------------------------------------------------------------------------------------------------------------------------------------------------------------------------------------------------------------------------------------------|
|                                    | protection on German coastline by dikes & flood barriers.                                                                                                                                                                                                                                                                                 |
| AON Benfield (2013)                | AON Benfield, Historie von 1703 bis 2012: Winterstuerme in Europe, Stand: Januar 2013<br>-Rotterdam port closed<br>-all surge barriers Netherlands closed                                                                                                                                                                                 |
| Stoffelen (2014)                   | Stoffelen, Ad, Modelling Surges, Cork eSurge Training 20-21 Feb 2014.<br>-closure of Maeslantkering 09Nov2007 for first time since construction<br>-surge info for design from 1988<br>-anticipated closure rate ½ per 5 years<br>-mention of other Netherlands barriers: Oosterschelde, Krimpen a/d Ijssel, Maeslantkering, Hartelkering |
| Weissenberger and Chouinard (2015) | Weissenberger S and O Chouinard, Adaptation to Climate Change and Sea Level Rise, Springer Briefs in Environmental Science, 2015.<br>-closure of Delta Works dams during TILO                                                                                                                                                             |
| WIKI20180324                       | WIKI, Liste der Sturmfluten an der Nordsee, copied 2018/03/24,<br><a href="https://de.wikipedia.org/wiki/Liste_der_Sturmfluten_an_der_Nordsee">https://de.wikipedia.org/wiki/Liste_der_Sturmfluten_an_der_Nordsee</a><br>-first closing of Maeslantkering surge barrier Rotterdam                                                         |

Table S21. Storm Tilo/Andrea: beach damage (arranged by year and then alphabetically)

| Source              | Full Reference and Notes                                                                                                                                                                                                                                                                                                                                                                                                                                                                    |
|---------------------|---------------------------------------------------------------------------------------------------------------------------------------------------------------------------------------------------------------------------------------------------------------------------------------------------------------------------------------------------------------------------------------------------------------------------------------------------------------------------------------------|
| Heyken (2007)       | Heyken, Herma, Schwere Sturmflut an niedersachsischer Nordseekuste - Dunnenabbruche auf den Inseln, 09/11/2007, NLWKN Niedersachsischer Landesbetrieb fuer Wasserwirtschaft, Kuesten- und Naturschutz.<br>-dune breaches: Hammersee, Langeoog, Spiekeroog, Wangeroog<br>-8 million euros spent on extra dune protection previous summer                                                                                                                                                     |
| Tagesspiegel (2007) | Der Tagesspiegel, Orkan 'Tilo'. Duenenabbruch kostet Helgoland Millionen, 09/11/2007, 16:55 (mit AFP/ddp)<br>-massive damage on Helgoland dunes<br>-severe dune collapse Juist, Langeoog, Spiekeroog, Wangeroog - report NLWKN                                                                                                                                                                                                                                                              |
| Heyken (2008)       | Heyken, Herma, 15 Sturmfluten sind keine Boten des Klimawandels, in Herma Heyken (ed), Jahresbericht 2007, NLWKN Niedersachsischer Landesbetrieb fuer Wasserwirtschaft, Kuesten- und Naturschutz, pp14-15, Norden, April, 2008<br>-dune collapse: Juist (at Hammersee), Langeoog (Pirolatal), Spiekeroog (Suderdunen), Wangeoog (Harlehorn)<br>-dune chain massively strengthened summer 2007<br>-winter 2006/7 threatened complete breakthrough of dune chain; further breaks on 09Nov2007 |
| Lefebvre (2008)     | Lefebvre, Christiana, Orkan TILO am 8. und 9. November 2007, DWD report 01Jan2008<br>-significant dune collapse in Helgoland where surge water levels 2.50m over MThw<br>-some reports of dune collapse on islands & coast of North Sea                                                                                                                                                                                                                                                     |
| AON Benfield (2013) | AON Benfield, Historie von 1703 bis 2012: Winterstuerme in Europe, Stand: Januar 2013<br>-dune collapses on Langeoog & Juist                                                                                                                                                                                                                                                                                                                                                                |
| Loewe (2013)        | Loewe,P, Atmosphaerenphysik, pp37-114, System Nordsee. 2006 & 2007: Zustand und Entwicklungen, ed. by P. Loewe, H. Klein, S. Welgelt-Krenz, Berichte des Bundesamtes fuer Seeschiffahrt und Hydrographie, Nr.49/2013<br>-significant dune collapses on Ostfrisian Islands during BRITTA & TILO                                                                                                                                                                                              |
| WIKI20180324        | WIKI, Liste der Sturmfluten an der Nordsee, copied 2018/03/24,<br><a href="https://de.wikipedia.org/wiki/Liste_der_Sturmfluten_an_der_Nordsee">https://de.wikipedia.org/wiki/Liste_der_Sturmfluten_an_der_Nordsee</a><br>-massive dune collapses on Helgoland                                                                                                                                                                                                                               |

Table S22. Storm Tilo/Andrea: list bridge closures, cancelled ferry crossings, port closures, airport cancel, rail interruptions (arranged by year and then alphabetically)

| Source              | Full Reference and Notes                                                                                                                                                                                                                                                                                                                                                                                                                                                                                                                                                                                                                                     |
|---------------------|--------------------------------------------------------------------------------------------------------------------------------------------------------------------------------------------------------------------------------------------------------------------------------------------------------------------------------------------------------------------------------------------------------------------------------------------------------------------------------------------------------------------------------------------------------------------------------------------------------------------------------------------------------------|
| BBC (20071109b)     | BBC, Thousands go home after tide fear, Friday 9 November, 16:50GMT<br>-Felixstowe port closed<br>-rail line flooded Norwich-Lowestoft                                                                                                                                                                                                                                                                                                                                                                                                                                                                                                                       |
| KIT20071117         | KIT20071117, Sturm, Schnee, Regen. Mitteleuropa/Schwarzes Meer 09.-13.11.2007 (text CE), Karlsruhe Institute of Technology, Wettergefahren-Fruehwarnung, Institut fuer Meteorologie und Klimaforschung, Samstag, 17.November 2007, 18:00MEZ<br>-earliest opening wintersport towns of Lech & Zurs since 1974<br>-high level of avalanche threat in Alps                                                                                                                                                                                                                                                                                                      |
| LCW (20071123)      | Lloyd's Casualty Week, Weather and Navigation, pp17-20, Nov23/2007<br>-bridges closed to high-sided vehicles: Skye, Kessock, Tay, Forth; Erskine central Scotland completely closed<br>-ferry operator Caledonian MacBrayne cancelled 6 crossings with a dozen more disrupted by weather (interrupted services: Ullapool to Stornaway; Mallaig to Canna)<br>-Rotterdam & Hamburg ports closed<br>-some ferries to East Frisian islands cancelled<br>-storm closed Vagar airport in Faroe Islands; ferry & bus companies suspended services (Nov8?)<br>-a few ferry crossings between Sweden, Norway & Denmark have been cancelled (Denmark Road Directorate) |
| Tagesspiegel (2007) | Der Tagesspiegel, Orkan 'Tilo'. Duennenabbruch kostet Helgoland Millionen, 09/11/2007, 16:55 (mit AFP/ddp)<br>-ferries to Germany Ostfriesen islands stopped<br>-ship traffic jam in front of Antwerp<br>-Kiel Canal closed because of high water; ship traffic jam                                                                                                                                                                                                                                                                                                                                                                                          |
| AONbenfield (2013)  | AON Benfield, Historie von 1703 bis 2012: Winterstuerme in Europe, Stand: Januar 2013<br>-Rotterdam port closed                                                                                                                                                                                                                                                                                                                                                                                                                                                                                                                                              |

Table S23. Storm Tilo/Andrea: structural damage to wind farms & buildings (arranged by year and then alphabetically)

| Source                          | Full Reference and Notes                                                                                                                                                                                                                                                    |
|---------------------------------|-----------------------------------------------------------------------------------------------------------------------------------------------------------------------------------------------------------------------------------------------------------------------------|
| North Norfolk News (2007)       | North Norfolk News, Surge floods prompt new erosion fears, 14 November 2007, 01:00, Happisburgh Village Website, <a href="http://www.happisburgh.org.uk/press/nnn141107.html">http://www.happisburgh.org.uk/press/nnn141107.html</a><br>-decking on Cromer pier splintered  |
| Outzen et al (2008)             | Outzen, O., K. Herklotz, H. Heinrich, C. Lefebvre, Extreme waves at FINO1 research platform caused by storm 'Tilo' on 9 November 2007, DEWI Magazin No. 33, August 2008.<br>-damage to FINO1 platform 15m working deck from wave strike.                                    |
| Hessner (2011)                  | Hessner, K., Extreme wave analysis at FINO1 during TILO storm event Nov. 8-9, 2007, Ocean WaveS GmbH data report for DONG Energy Power A/S, OceanWaveS GmbH, Hansekontor, Vor dem Bardowicker Tore 6b, 21339 Luneburg, Germany, July 2011<br>-FINO1 working platform damage |
| Caithness Windfarm (2018/08/05) | Caithness Windfarm, Wind Turbine Accident and Incident Compilation, 2018/08/05<br>-3 wind energy accident reports from Scotland 07-08Nov2007                                                                                                                                |

Table S24. Storm Tilo/Andrea: general ship/rig emergency reports/offshore incidents/platform evacuations (arranged by year and then alphabetically)

| Source      | Full Reference and Notes                                                                    |
|-------------|---------------------------------------------------------------------------------------------|
| Aftenposten | Aftenposten, Ekofisk og Valhall evakueres for stormen.1500 ansatte pa oljefeltene kofisk og |

|                               |                                                                                                                                                                                                                                                                                                                                                                                                                                                                                                                                                                                                                                                                                                           |
|-------------------------------|-----------------------------------------------------------------------------------------------------------------------------------------------------------------------------------------------------------------------------------------------------------------------------------------------------------------------------------------------------------------------------------------------------------------------------------------------------------------------------------------------------------------------------------------------------------------------------------------------------------------------------------------------------------------------------------------------------------|
| 20071106                      | Valhall i Nordsjoen kan bli evakuerte for den forventede storm Andrea natt til fredag.<br>06Nov2007 13:35<br>-Evacuation of Valhall & Ekofisk from Thursday 08Nov2007<br>-1400 people from Ekofisk moved to other platforms or land                                                                                                                                                                                                                                                                                                                                                                                                                                                                       |
| BBC (20071107a)               | BBC, North Sea flood tide fears recede, Fri 09 November 2007, 1033GMT<br>-Norway forced to close several oil platforms off coast; Norway 5 <sup>th</sup> largest exporter crude oil<br>-Norway production 220000bpd expected to be slashed by 10%; expected increase in crude world prices                                                                                                                                                                                                                                                                                                                                                                                                                |
| BBC (20071107b)               | BBC, Thousands go home after tide fear, Friday 9 November, 16:50GMT<br>-platforms off Norway closed                                                                                                                                                                                                                                                                                                                                                                                                                                                                                                                                                                                                       |
| Guardian (20071112)           | The Guardian, Environmental disaster as Russian tanker sinks, Mon, 2007/11/12, 09:18 GMT (reporter: Luke Harding, Moscow)<br>-ship disaster in Black Sea; Volganefit-139 oil spill described                                                                                                                                                                                                                                                                                                                                                                                                                                                                                                              |
| KIT20071117                   | KIT20071117, Sturm, Schnee, Regen. Mitteleuropa/Schwarzes Meer 09.-13.11.2007 (text CE), Karlsruhe Institute of Technology, Wettergefahren-Fruehwarnung, Institut fuer Meteorologie und Klimaforschung, Samstag, 17.November 2007, 18:00MEZ<br>-outline of Black Sea storm events; tanker sinking with 2000t oil                                                                                                                                                                                                                                                                                                                                                                                          |
| Kustwachtcentrum (2007/11/09) | Kustwachtcentrum, Persbericht, Noordwester storm, Info nr.1, 09Nov/2007<br>-4 ship events associated with sea state off Netherlands coast                                                                                                                                                                                                                                                                                                                                                                                                                                                                                                                                                                 |
| LCW(20071123)                 | Lloyd's Casualty Week, Weather and Navigation, pp17-20, Nov23/2007<br>-Norwegian oil production to be cut by 10% or 220000 barrels/day after BP closes Valhall & ConocoPhillips planned to shut 5 Ekofisk field platforms<br>-BP spokesman said Valhall expected to be down for a few days; total suspended 80000 Bpd production<br>-press report Nov10: oil production on Norwegian shelf back to normal after 7 platforms closed down before before storm hit North Sea Thursday Nov8<br>-700 oil workers evacuated from most exposed platforms as precaution on Wed & Thu (Nov 7 & 8)<br>-NRK: no reports of serious damage or injuries<br>-loss of 6.5 million NOK in income for company StatoilHydro |
| Met Eireann (200711)          | Met Eireann, Monthly Weather Bulletin, No.259, November 2007.<br>-outline of ship sinkings/groundings during Black Sea storm                                                                                                                                                                                                                                                                                                                                                                                                                                                                                                                                                                              |
| PON (2007)                    | PON_1_2007_data (MS Excel spreadsheet, 'published on 12/03/2013'), hyperlink access from: <a href="https://www.gov.uk/guidance/oil-and-gas-environmental-alerts-and-incident-reporting">https://www.gov.uk/guidance/oil-and-gas-environmental-alerts-and-incident-reporting</a> , Oil and gas: environmental alerts and incident reporting including anonymous reporting. (spreadsheet downloaded 14Sep2018, document timestamp 15Jun2012)<br>-UK.GOV spreadsheet with 2 cases of offshore platform leakages from severe weather                                                                                                                                                                          |
| Telegraph (20071111)          | The Telegraph, Ecological disaster feared after tanker sinks, (contributor: Paul Eccleston) (11Nov2007)<br>-ecological disaster with oil spill from Volganefit-139<br>-6 other ships ran aground                                                                                                                                                                                                                                                                                                                                                                                                                                                                                                          |
| Upstream20071107_pitt         | Upstream, Anthea Pitt, 07Nov2007, Evacuations under way as storm roars in<br>-evacuation from Ekofisk (ConocoPhillips) & Valhall (BP)<br>-Valhall shutting end of 07Nov2007<br>-subsidence at Ekofisk (6-7m) & Valhall<br>-StatoilHydro has no plans to shut production<br>-no platform evacuations UK sector                                                                                                                                                                                                                                                                                                                                                                                             |
| Upstream20071109_davis        | Upstream, Jonathan Davis, 2007/11/09, Storm Downs Nexen's Buzzard<br>-Buzzard platform production shut down; 1 of 3 power generation turbine exhaust stacks damaged<br>-StatoilHydro resumed production at Visund & Oseberg South<br>-Statoil closed 9 platforms in Nsea sector; worried about lifeboat capacity at Heimdal & Gran fields<br>-ConocoPhillips had shut down 7 platforms; previously indicated 5                                                                                                                                                                                                                                                                                            |
| Upstream2007110               | Upstream, Michael O'Neill, 2007/11/09, Storms force Ekofisk closures                                                                                                                                                                                                                                                                                                                                                                                                                                                                                                                                                                                                                                      |

|                            |                                                                                                                                                                                                                                                                                                                                                                                                                                                                                     |
|----------------------------|-------------------------------------------------------------------------------------------------------------------------------------------------------------------------------------------------------------------------------------------------------------------------------------------------------------------------------------------------------------------------------------------------------------------------------------------------------------------------------------|
| 9_oneill                   | -ConocoPhillips closed 7/16 platforms in Ekofisk field; originally planned 5/16<br>-StatoilHydro planned 320000 boed lost production; ended up with 110000 boed lost production<br>-Visund platform restarted night Nov8-9; Oseberg south restarted later Nov 9                                                                                                                                                                                                                     |
| Upstream2007110<br>9_wells | Upstream, Rob Wells, 09Nov2007, Passing storm keeps platforms shut<br>-same info O'Neill report<br>-England east coast surge 20cm lower than expected                                                                                                                                                                                                                                                                                                                               |
| Upstream2007111<br>2_pitt  | Upstream, Anthea Pitt, 12Nov2007, Storm clips Buzzard's wings<br>-Buzzard platform remained closed on Monday after storm because of damage to 1 of 3 turbine exhaust stacks                                                                                                                                                                                                                                                                                                         |
| Lefebvre (2008)            | Lefebvre, Christiana, Orkan TILO am 8. und 9. November 2007, DWD report 01Jan2008<br>-significant damage to Forschungsplattform Nordsee (FINO1)<br>-Norway suspended operations on Nsea oil/gas & some shipping suspended                                                                                                                                                                                                                                                           |
| Outzen et al<br>(2008)     | Outzen, O., K. Herklotz, H. Heinrich, C. Lefebvre, Extreme waves at FINO1 research platform caused by storm 'Tilo' on 9 November 2007, DEWI Magazin No. 33, August 2008.<br>-wave damage to FINO1 research platform                                                                                                                                                                                                                                                                 |
| Magnusson (2009)           | Magnusson, A.K., Forecasting extreme waves in practice, May 19, 2009, Rogue waves 2008, Brest, France, 13-15 Oct., 2008. <a href="http://www.ifremer.fr/web-com/stw2008/rw">http://www.ifremer.fr/web-com/stw2008/rw</a><br>-first years EXWW 3h forecast sufficient<br>-Ekofisk demobilization procedures started 2005-2006; needs 3d forecast Hs<br>-Hs=9m considered threshold for action<br>-measuring systems have peak clipping<br>-TILO evacuations not explicitly mentioned |
| AONbenfield<br>(2013)      | AON Benfield, Historie von 1703 bis 2012: Winterstuerme in Europe, Stand: Januar 2013<br>-Norway oil production interrupted                                                                                                                                                                                                                                                                                                                                                         |

Table S25. Storm Tilo/Andrea: instrument failures during storm (arranged by year and then alphabetically)

| Source                      | Full Reference and Notes                                                                                                                                                                                                                                                                                                                                                                                                                     |
|-----------------------------|----------------------------------------------------------------------------------------------------------------------------------------------------------------------------------------------------------------------------------------------------------------------------------------------------------------------------------------------------------------------------------------------------------------------------------------------|
| RWS (2007)                  | RWS, Verslag van de Stormvloed van 9 november 2007 (SR88), Ministerie van Verkeer en Waterstaat, Directoraat-Generaal Rijkswaterstaat Waterdienst, Stormvloedwaarschuwingsdienst/SVSD, Postbus 17, 8200 AA Lelystad <a href="http://www.svvd.nl">www.svvd.nl</a> , Lelystad, november 2007, 45pp<br>-wave & meteorological instruments with data gaps                                                                                        |
| Outzen et al<br>(2008)      | Outzen, O., K. Herklotz, H. Heinrich, C. Lefebvre, Extreme waves at FINO1 research platform caused by storm 'Tilo' on 9 November 2007, DEWI Magazin No. 33, August 2008.<br>-FINO1 waverider buoy reported to be nonfunctional during TILO storm.                                                                                                                                                                                            |
| Goennert and<br>Buss (2009) | Goennert, Gabriele & Thomas Buss, Sturmfluten zur Bemessung von Hochwasserschutzanlagen, Berichte des Landesbetriebes Strassen, Bruecken und Gewaesser Nr.2/2009, Freie und Hansestadt Hamburg, Landesbetrieb Strassen, Bruecken und Gewaesser, Hamburg, ISSN 1867-7959.<br>-36h failure of Scharhorn met station during storm TILO evening 08Nov2007 to morning 10Nov2007<br>-partial failure of Cuxhaven tide gauge 20:00-23:00 09/11/2007 |
| Magnusson (2009)            | Magnusson, A.K., Forecasting extreme waves in practice, May 19,2009, Rogue waves 2008, Brest, France, 13-15 Oct., 2008. <a href="http://www.ifremer.fr/web-com/stw2008/rw">http://www.ifremer.fr/web-com/stw2008/rw</a><br>-data gap in waverider record 03:00 Nov9/2007 before maximum Hs 06:30                                                                                                                                             |
| Magnusson<br>(2009b)        | Magnusson AK, 2009, What is true sea state, Proceedings of the 11th International Workshop on Wave Hindcasting and Forecasting and Coastal Hazard Symposium, JCOMM Halifax, Canada, Oct 18-23, 2009, Technical Report No 52, WMO/TD-No. 1533, IOC Workshop Report No. 232.<br>-radio transmission interruption from Waverider 1.5km from receiver at Ekofisk during high sea state                                                           |
| Herrling et al<br>(2010)    | Herrling, Gerald, Heiko Knaack, Ralf Kaiser, Hanz D. Niemayer, Evaluation of design water levels at the Ems-Dollard estuary considering the effect of a storm surge barrier, Coastal                                                                                                                                                                                                                                                         |

|                              |                                                                                                                                                                                                                                                                                                                                         |
|------------------------------|-----------------------------------------------------------------------------------------------------------------------------------------------------------------------------------------------------------------------------------------------------------------------------------------------------------------------------------------|
|                              | Engineering 2010.<br>-data gaps in time series water level at Emden.                                                                                                                                                                                                                                                                    |
| Hessner (2011)               | Hessner, K., Extreme wave analysis at FINO1 during TILO storm event Nov. 8-9, 2007, Ocean WaveS GmbH data report for DONG Energy Power A/S, OceanWaveS GmbH, Hansekantor, Vor dem Bardowicker Tore 6b, 21339 Luneburg, Germany, July 2011<br>-data gaps in AWAC & WAMOSII wave instrumentation                                          |
| Magnusson (2011)             | Magnusson, Ann Karin, True sea state ...? Comparing different sensors and analyzing techniques, 12th Wave Workshop, Hawaii's Big Island, Oct.30-Nov4, 2011 (32 slides)<br>-bias in Waverider and MRF at sea states >8m probably due to MIROS quality control procedures.<br>-LASAR system seems okay but with some spikes and data gaps |
| Magnusson and Donelan (2013) | Magnusson, AK and MA Donelan, The Andrea wave. Characteristics of a measured North Sea rogue wave, Journal of Offshore Mechanics and Arctic Engineering, 135, 1-10, 2013<br>-short data gaps in LASAR record<br>-AIGR parameter & sea spray plume after crest of Andrea wave                                                            |

Table S26. Storm Tilo/Andrea: model results and fields (arranged by year and then alphabetically)

| Source                 | Full Reference and Notes                                                                                                                                                                                                                                                                                                                                                                                                                                                                                                                                                                                                                                                                                                                                                                                                                                                                                         |
|------------------------|------------------------------------------------------------------------------------------------------------------------------------------------------------------------------------------------------------------------------------------------------------------------------------------------------------------------------------------------------------------------------------------------------------------------------------------------------------------------------------------------------------------------------------------------------------------------------------------------------------------------------------------------------------------------------------------------------------------------------------------------------------------------------------------------------------------------------------------------------------------------------------------------------------------|
| KIT20071117            | KIT20071117, Sturm, Schnee, Regen. Mitteleuropa/Schwarzes Meer 09.-13.11.2007 (text CE), Karlsruhe Institute of Technology, Wettergefahren-Fruehwarnung, Institut fuer Meteorologie und Klimaforschung, Samstag, 17.November 2007, 18:00MEZ<br>-maps of 500hPa geopotential & ground pressure 06-13Nov2007<br>-maps of 850hPa geopotential & temperature 06-13Nov2007                                                                                                                                                                                                                                                                                                                                                                                                                                                                                                                                            |
| RWS (2007)             | RWS, Verslag van de Stormvloed van 9 november 2007 (SR88), Ministerie van Verkeer en Waterstaat, Directoraat-Generaal Rijkswaterstaat Waterdienst, Stormvloedwaarschuwingsdienst/SVSD, Postbus 17, 8200 AA Lelystad <a href="http://www.svsd.nl">www.svsd.nl</a> , Lelystad, november 2007, 45pp<br>-FIG3.1: Map 08Nov 1900M: wind speed, wind direction, surface air pressure; max wspd near coast SW Norway<br>-FIG3.2: Map 08Nov 2200M: wind speed, wind direction, surface air pressure; max wspd near coast SW Norway<br>-FIG3.3: Map 09Nov 0400M: wind speed, wind direction, surface air pressure; max wspd near coast SW Norway<br>-FIG3.4: Map 09Nov 1000M: wind speed, wind direction, surface air pressure; max wspd near coast SW Norway<br>-FIG3.5: Map 09Nov 1600M: wind speed, wind direction, surface air pressure<br>-FIG3.6: Map 09Nov 2200M: wind speed, wind direction, surface air pressure |
| Magnusson et al (2008) | Magnusson, A.K., J. Johannessen, K.-F. Dagestad, O. Breivik, O.J. Aarnes, B. Furevik, Bolgestrom interaksjon til nytte for oljeindustri, WACUSAR_sluttrapport.doc, 19/12/2008<br>-wave model map results for North Sea & special Karmoy case study                                                                                                                                                                                                                                                                                                                                                                                                                                                                                                                                                                                                                                                               |
| Magnusson (2009)       | Magnusson, A.K., Forecasting extreme waves in practice, Proceedings Rogue waves 2008, ed. by Michel Olagnon and Marc Previsto, Brest, France, 13-15 Oct., 2008. <a href="http://www.ifremer.fr/web-com/stw2008/rw">http://www.ifremer.fr/web-com/stw2008/rw</a> (pdf date stamp May 19,2009).<br>-FIG12: ECMWF prediction on 6-240h time scales; U10, Hs, Tp at Ekofisk<br>-FIG13: Map of forecast wave field by ECMWF model +84h & +96h.<br>Oldest forecast closest to Ekofisk waverider<br>-FIG14: Map of forecast Hs 08Nov2007 18UTC at +54h for WAM10 & +66h from ECMWF. Storm maxima in W Nsea<br>-FIG15: Map of forecast Hs +33h at 08Nov2007 with ECMWF, WAM fine/course resolution                                                                                                                                                                                                                       |
| Herrling et al (2010)  | Herrling, Gerald, Heiko Knaack, Ralf Kaiser, Hanz D. Niemayer, Evaluation of design water levels at the Ems-Dollard estuary considering the effect of a storm surge barrier, Coastal Engineering 2010.<br>-FIG4. Wind speed & direction map over northwest Europe during storm TILO, 09Nov2007 0900UTC.                                                                                                                                                                                                                                                                                                                                                                                                                                                                                                                                                                                                          |



|                              |                                                                                                                                                                                                                                                                                                                                                                                             |
|------------------------------|---------------------------------------------------------------------------------------------------------------------------------------------------------------------------------------------------------------------------------------------------------------------------------------------------------------------------------------------------------------------------------------------|
| Gray et al (2011)            | Gray AL, O Martinez-Avarado, LH Baker, PA Clark, Conditional symmetric instability in sting-jet storms, QJRMS, 137, 1482-1500, 2011<br>-model field analysis of TILO with trajectory diagnostic                                                                                                                                                                                             |
| Magnusson (2011)             | Magnusson, Ann Karin, True sea state ...? Comparing different sensors and analyzing techniques, 12th Wave Workshop, Hawaii's Big Island, Oct.30-Nov4, 2011 (32 slides)<br>-gridded fields of wind speed, wind direction, sea level pressure at 09Nov2007 at 00:00UTC<br>-modelled Hs field in North Sea & south Norwegian Sea with Ekofisk indicated; highest Hs field near Norwegian coast |
| Esurge_2007_tilo (2012)      | Esurge_2007_tilo (2012), North Sea surge (2007) by Phillip Harwood 2012/11/01 18:00<br>-NOC storm surge model of North Sea                                                                                                                                                                                                                                                                  |
| Magnusson and Donelan (2013) | Magnusson, AK and MA Donelan, The Andrea wave. Characteristics of a measured North Sea rogue wave, Journal of Offshore Mechanics and Arctic Engineering, 135, 1-10, 2013<br>-FIG4. Hindcast fields of winds, surface pressure, and waves from NORA10 database. Left: mean sea level pressure with wind arrows. Right: Hs with arrows for mean wave direction                                |
| Brecht and Frank (2014)      | Brecht, B and H Frank, High resolution modelling of wind fields for optimization of empirical storm flood predictions, Adv/ Sci. Res., 11, 1-6, 2014.<br>-FIG3. Wind field over Nsea for storm TILO 09Nov2007 06:00UTC, 3h before maximum water level at Norderney. 10m wspd in knots. 2hPa pressure intervals. Blue dots location verification stations.                                   |
| Stoffelen (2014)             | Stoffelen, Ad, Modelling Surges, Cork eSurge Training 20-21 Feb 2014.<br>-TILO convection cells resolved with high resolution 1.7km Harmonie with assimilated Quikscat<br>-TILO map of model predictions of surface wind speed southern North Sea with Qscat                                                                                                                                |
| Capellen email 25Sep1999     | Email from John Capellen DMI on 25Sep1999<br>-Nat/Europe wind speed field 0600UTC 09Nov2007                                                                                                                                                                                                                                                                                                 |

Table S27. Storm Tilo/Andrea: climatological background of storm (arranged by year and then alphabetically)

| Source             | Full Reference and Notes                                                                                                                                                                                                                                                                                                                                                                                                                                                                                                                                                                                                                                                                                                                |
|--------------------|-----------------------------------------------------------------------------------------------------------------------------------------------------------------------------------------------------------------------------------------------------------------------------------------------------------------------------------------------------------------------------------------------------------------------------------------------------------------------------------------------------------------------------------------------------------------------------------------------------------------------------------------------------------------------------------------------------------------------------------------|
| Met Eireann (2007) | Met Eireann, Monthly Weather Bulletin, No.259, November 2007.<br>-driest autumn in more than 20years; driest in Birr since 1933<br>-autumn mean air temperature 1-2C above normal<br>-County Mayo stations had warmest autumn on record; most other stations lower than autumn 2006<br>-torrential rain and floods/landslides in Tabasco, Mexico starting Oct 28; worst flooding in 5 decades<br>-heavy rain in Algeria between Nov24-28<br>-heavy rain in Vietnam starting on Oct 26 and continues until mid-November<br>-severe to extreme drought in China across much of south of country<br>-heavy snowfall in Europe cause ski resorts to open early; 500mm snow near Vienna on Nov. 15; Zurich had heaviest snowfall since 1955. |
| Eden (2008)        | Eden, Philip, Weather Log, November 2007, Weather, 63(1), i-iv, 2008.<br>-mean max temperature Nov2007 1C higher than 1971-2000 mean in all regions<br>-mean min temperature 2.5C above normal in Scotland & N Ireland by at normal in England                                                                                                                                                                                                                                                                                                                                                                                                                                                                                          |
| Heyken (2008)      | Heyken, Herma, 15 Sturmfluten sind keine Boten des Klimawandels, in Herma Heyken (ed), Jahresbericht 2007, NLWKN Niedersaechsicher Landesbetrieb fuer Wasserwirtschaft, Kuesten- und Naturschutz, pp14-15, Norden, April, 2008<br>-15 storm surges in 1 year not indication of climate change<br>-interannual variability of surge frequency; 1950-1960s low; 1970s-1990s high; 2006-2008 high<br>-highest hurricane floods Norderney in 1963 & 1976<br>-Britta & Tilo were worst storm surges; 2 other severe surges 12Jan2007 & 18Mar2018 with                                                                                                                                                                                        |

|                      |                                                                                                                                                                                                                                                                                                                                                                                                                                                                                                                                                               |
|----------------------|---------------------------------------------------------------------------------------------------------------------------------------------------------------------------------------------------------------------------------------------------------------------------------------------------------------------------------------------------------------------------------------------------------------------------------------------------------------------------------------------------------------------------------------------------------------|
|                      | <p>Norderney level 2.16m</p> <ul style="list-style-type: none"> <li>-record June skew surge of 1.32m (2.88m uNN) on 26Jun2007; prev record 2.75m uNN 29June 1960</li> <li>-unusual inland flooding in southern Niedersachsen.</li> <li>-FIG. Time series 1936-2007 Norderney storm surge numbers</li> </ul>                                                                                                                                                                                                                                                   |
| Bancroft (2008)      | <p>Bancroft, George P, Marine Weather Review - North Atlantic Area. September through December 2007, Mariners Weather Log, Vol 52, No 1, April 2008.</p> <ul style="list-style-type: none"> <li>-in terms of winds, TILO strongest storm in this part of Atlantic basin in 3 month period</li> </ul>                                                                                                                                                                                                                                                          |
| Reuter et al (2009)  | <p>Reuter R, TH Badewien, A Bartholoma, A Braun, A Luebben, J Rullkoetter, A hydrographic time series station in the Wadden Sea (southern North Sea), Ocean Dynamics, DOI 10.1007/s10236-009-0196-3, 2009</p> <ul style="list-style-type: none"> <li>-winters 2006-7 &amp; 2007-8 significantly warmer than usual</li> <li>-very high warming trend at station Wattenmeer 2002-2009</li> </ul>                                                                                                                                                                |
| Metoffice (20110511) | <p>MetOffice, Storm surge - November 2007, Met office website last updated 11May2011. <a href="https://www.metoffice.gov.uk/about-us/who/how/case-studies/floods-2007">https://www.metoffice.gov.uk/about-us/who/how/case-studies/floods-2007</a>.</p> <ul style="list-style-type: none"> <li>-storm surges are likely to be higher &amp; more frequent under climate change, as early as this century</li> </ul>                                                                                                                                             |
| Loewe (2017)         | <p>Loewe,P, Atmosphaerenphysik, pp37-114, System Nordsee. 2006 &amp; 2007: Zustand und Entwicklungen, ed. by P. Loewe, H. Klein, S. Welgelt-Krenz, Berichte des Bundesamtes fuer Seeschiffahrt und Hydrographie, Nr.49/2013</p> <ul style="list-style-type: none"> <li>-2006/2007 warmest in 130 year weather record</li> <li>-temperatures 3K above normal in all months &amp; seasons</li> <li>-Omega blocking high phenomenon</li> <li>-Britta &amp; Tilo assessed as worst storm surges of 100y; significant dune collapse Ost-Frisian islands</li> </ul> |

## **S12 Record of manuscript reviews and corrections**

### **Manuscript modifications following referee reports**

Referee 1:

The figure 5 is important and as such displays its information clearly. But I have a problem being sure if the various wiggly lines and short bars depicting the progression of the tide and the position of the events actually agree in position well or not? Could a numerical estimate of the match between various of the graphical elements be designed, and then a quantitative piece of information be presented? Such a measure could then be exposed to Monte Carlo testing and the significance of its value be understood.

**Author's Response:**

Figure 5 is a summary diagram of all the data sets plotted on axes of time versus distance around the North Sea. It shows the progression of the surge peak, semi-diurnal tidal peaks, short period oscillations, and infrastructure incidents. The figure indicates that there may be relationships in time and location among the geophysical parameters and the infrastructure events.

The reviewer has suggested if there is a way to compare the different graphical elements in the figure. The easiest way to do this is a pair-wise comparison of the individual datasets and a statistical analysis of their time offsets. An example of this is shown in Figure S5 of the Supplementary Material for a comparison of the offshore events and the short period oscillations. Of the full set of offshore events, a subset of eight was selected on the basis of precise time reports. The histogram of the time difference between these events and the highest down-crossing oscillation at the nearest the tide gauge station indicates that half of the events occurred within two hours of the highest oscillation.

The reviewer has suggested a sophisticated Monte Carlo approach to assess significance of this kind of result. This was not done because of the sparse nature of the data set and possible reporting biases for the infrastructure events. The conference presentation was intended as general overview of the events of one storm, and journal page limitations prevent the expansion of the manuscript in this direction. The reviewer's suggestion of a sophisticated statistical analysis may be useful if the phase relationships among the different data sets that were observed for Storm Tilo are also seen for other storms.

**Author's Changes in Manuscript**

The following sentence was added to the manuscript:

Figures S5 of the Supplementary Material focuses on the pairwise comparison of the offshore events and the highest short period oscillations of the closest tide gauge station, and it suggests that there may be a close relationship between these data sets.

Referee 1:

1) I don't know what a 'skew surge' is. It is probably straightforward to explain, and may well be a common phrase in some research areas, but it does not immediately explain itself to me. I'd suggest it can be explained, as this would increase the accessibility to a wider audience.

**Author's Response:**

The definition of the skew surge is included in the updated manuscript and a reference is made to Williams et al (2016). 'Skew surge' is the difference between the maximum measured sea level during a storm event and the expected high tide level based on a model.

**Author's Changes in Manuscript:**

Two sentences in the manuscript have been changed:

The height of the measured of the measured water level above the expected high tide prediction (i.e., skew surge; William et al., 2016) is an important parameter to assess the impact of storm surge coastal flooding. For this study, the height of the maximum measured water level (Fig. 3a) minus the median of the high tide peaks for period of the analysis of 1–14 November 2007 is shown for different locations around the North Sea in Fig. 4.

Additional sentences have been added to the header for Table S3 in the Supplementary Material for clarification of the literature reports of skew surge:

Note that the different national sea level agencies have slightly different methods of reporting the skew surge concept. For example, in the UK it is calculated as the measured water level minus the expected high tide level based on a model of the different spectral tide components over a long period. In Germany, the skew surge concept is reported as the measured water level minus the average of the high tide levels over a long period of time.

Referee 1:

2) On Page 7 near lines 11 and 12 I would like to see a few more details on this 'e folding decay time' - what is it and what is the physics behind it? A good reference is enough for the interested reader.

Author's response:

The referee is correct, and the passage has been changed to give more information on the e-folding decay time.

Author's Change in Manuscript:

The following passage has been added to manuscript:

The technical literature recognizes that the extreme water level fluctuations associated with tsunamis and harbour seiches last for periods of hours to days, oscillating at particular frequencies before decaying out through frictional energy losses (Pugh, 1987; Murty, 1977; Pattiaratchi and Wijeratne, 2015). Many published time series recordings of the phenomena show approximately exponentially decreasing trends. Murty (1977, p.243) quantifies the trend in terms of a 'decay constant', which would correspond to the inverse of the e-folding time in his mathematical treatment, and Dean and Dalrymple (1991) give more information on the mathematical description of exponentially decaying long waves.

Referee 1:

3) Also on page 7 near line 27 we are told that sea-levels have exceeded numerical model predictions - I am fine with the idea, but some references are needed. Elaborating this part of the evaluation of the project outcome could strengthen future uses of the method employed in the work.

Author's Response:

The referee is correct, and the passage has been clarified with references.

Author's Change in the Manuscript:

The revised sentence now appears as:

On the other hand, storm flood levels during Storm Britta exceeded the numerical model predictions that encapsulate the understanding of storm surge dynamics (RWS, 2006a,b; RWS, 2007a), and certain reports indicate there may have been a high risk of coastal dyke breaches and flooding (Ulm et al., 2018).

Referee 2:

(1) you should add an atmospheric Figure showing storm Tilo dynamics - perhaps show a series of MSLP/surface wind maps (each hour or something) or plot a center of cyclone minimum on one map (so map, cross to mark position of cyclone minimum and hour of cyclone minimum at one location, then at the next location, and so on...).

Author's Response:

For background meteorological information, the original EGU 2019 poster presentation had an infrared satellite cloud image, time series graph of wind speed at the North Sea Ekofisk platform, and a schematic map showing energy infrastructure impacts. Journal page constraints prevent the inclusion of extra meteorology graphs in the main manuscript, so additional information has been included in the Supplementary Material.

Author's Change in Manuscript

In the Supplementary Material, a section has been added near the end with tabulated working notes for the project. One of the thematic tables lists meteorological information that has been located in different published reports. As well, three figures from the EGU 2019 poster have been added to the Supplementary Material: an AVHRR cloud satellite image from the storm (Figure S8), time series wind speed and wave height data from the central North Sea (Figure S9), and a schematic map showing the main energy infrastructure impacts (Figure S10).

Referee 2.

(2) You seem to confuse spectral analysis with filtering throughout the paper. I would say that you first did spectral analysis, from this you have determined appropriate cut-off periods, and then did filtering to obtain time series shown in Figure 3 and used for subsequent analysis. Is this so or you did something else? If yes, please give characteristics of the filter which you have used.

Author's Response:

The referee is correct that the spectral analysis was conducted first and then two cut-off periods were chosen to define three bands with characteristic short periods, intermediate periods (tide), and long periods (surge). The procedure is based on Stull (1988) and described in the Methods section of the manuscript. The cut-off periods are given in the Methods section and shown graphically in Figure 2. The procedure might also be described in terms of spectral filters, and the cut-off periods described in terms of square or top-hat filters. However, this filter terminology was not used by Stull (1988), who described the process in terms of a time series reconstruction from different frequency bands. The submitted manuscript retains this terminology as it makes clear that the original time series can be simply reconstructed by adding up the three different frequency components given in the report. For some readers, 'filtering' terminology might give the impression that some characteristics of the data were lost or masked.

Author's Change in Manuscript:

No alterations were made for this comment.

Referee 2:

(3) Please add references throughout the manuscript wherever you give some claims above something (below I list some examples, but there are more instances you do not provide references for your claims!)

Author's Response:

The referee is correct that extra references are required in certain sections.

Author's Change in Manuscript:

Extra references have been added in the manuscript at the points indicated by the two referees. The Supplementary Material has an extra section with tables of references used in this work, divided according to the different storm impacts.

Minor comments:

Referee 2:

Page 2. Line 15. " and possibly other dynamic features that are poorly understood" - which other dynamic features? List them, and provide a reference.

Author response:

The referee is correct that there should be more information in this paragraph on the hypotheses for large wave events.

Author's Change in Manuscript:

This paragraph was split in two, and the following passage was placed in the new second paragraph:

The underlying physical mechanisms that give rise to these types of wave events are unclear. The presentation of Rosenthal et al. (2008) shows the model results of a ship-type wake pattern in the context of the Storm Britta but with much larger proportions that might result from a travelling low pressure centre. In an investigation of the New Year's Day storm of 1995, Rosenthal et al. (2011) highlights that two notable ship accidents in the northern and southern parts of the North Sea occurred under the same convective cloud band, and there is a possibility of a concentration of wave energy along atmospheric convergence lines in the flow direction of certain offshore storms. Another hypothesis relates to a resonant amplification of travelling wave groups from atmospheric gust structures moving at nearly the same speed during certain winter storms with open cloud cell convective structures (Rosenthal et al., 2011; Pleskachevsky et al., 2012).

Referee 2:

Page 2. Line 19. Add reference for Hurricane Katrina.

Author's Response:

The referee is correct that there should have been a reference here.

Author's Change in Manuscript:

The sentence has been changed to:

During hurricanes and cyclones at low latitudes, maximum surge levels can reach 9 m (Pugh 1987), and for Hurricane Katrina in the northern Gulf of Mexico water levels of 7.5 m were recorded (Muir-Wood and Grossi, 2008).

Referee:

Page 4. Regarding spectral analysis. I suggest creating an additional wavelet plot for this station - it would show more clearly during which time interval energy increased, and at which periods.

Author's response:

The Fourier spectral analysis in the manuscript was conducted as part of a procedure to separate the measured water level data into three components corresponding to sea surge, tides, and harbour seiches. A separate wavelet analysis

would be interesting as a follow-on project, but it was not the part of original EGU 2019 conference poster presentation. Journal page constraints prevent the extension of the analysis in this direction.

Author's Change in Manuscript:

No change in the manuscript has been made.

Referee:

Page 4. Lines 19-21. Add references for mentioned meteotsunami cut-off periods.

Author's response:

The referee is correct, and references to two overview papers have been included here.

Author's change in manuscript:

The sentence in the manuscript now appears as:

Other investigations of meteotsunamis have used similar filtering techniques to isolate the meteotsunami signal from the tide, and different frequency cutoff thresholds have been used corresponding to periods that vary between 2 and 6 hours (Monserrat et al, 2006; Pattiaratchi and Wijeratne, 2015).

Referee:

Page 5. You say that "Most of the reports give fairly precise information on the location and time of the accidents, and it is possible to compare them with the short period oscillation features observed in the water level data." - but I believe most of these off-shore accidents should be related to infragravity waves - and your tide gauges have a too long sampling period (10 min) to catch these waves. Please clarify.

Author's response

The referee is correct. The manuscript already contained a passage in the results section explaining the link between the wave accidents and the tide gauge signal:

Because the short period oscillations have amplitudes of tens of centimetres and periods on the order of tens of minutes to hours, they do not directly record the wave field that was identified as a contributing factor in several offshore incidents. On the other hand, they indicate where an analysis of wave data recordings might be targeted for insight into the offshore incidents.

Author's change in manuscript

The additional passage has been added to the manuscript at the point indicated by the referee:

Although some of the infrastructure events may have been caused by large infragravity waves whose time duration would be too short to register on tide gauges (e.g., KNRM, 2007), the impact of these waves on nearby coasts and harbours may have excited transient harbour seiches with periods on the order of 10's of minutes, which is within the measurement capability of water level recorders.

Referee 2:

Page 5. Line 20. "Eceed" -> "exceeding"

Author's response:

The referee is correct.

Author's change in manuscript:

The typo has been corrected

Referee 2:

Page 5. Line 25. "to the tide" -> "to the tide propagation speed". Also is this statement that speeds are comparable made just visually, or were the speed estimated/calculated from data? If you are to make this claim, please estimate/calculate speeds from data.

Author's response:

The referee is correct that this passage needed to be changed or better supported.

Author's change in manuscript:

The passage has been changed to highlight the feature and suggest possible different geophysical hypotheses that might be tested in other work:

Among some of the stations showing longer period oscillations, there are instances of temporal offsets that may be due to shallow water wave propagation or be linked with the field of moving atmospheric convection cells over the North Sea.

Referee 2:

Figure 2. Please add confidence intervals.

Author's response:

The referee is correct. An error analysis of the spectral graph has been carried out.

Author's change in manuscript:

A new spectral graph has been produced for the manuscript with the average and standard deviation uncertainty shown. An estimate of the noise level has been made. The figure caption has been changed and now reads:

**Figure 2. Spectrum of the 14 day water level time series from Lerwick, UK. The original 15 minute time series was subsampled to give three data sets of 45 minute resolution from which the spectral mean and standard deviation uncertainty could be calculated, as shown. The noise level was estimated based on the standard deviation of the first difference of the original time series.**

Referee 2:

Figure 3. Graphs are very hard to read. As you have a really huge number of stations, I suggest that you to only every third station. No information will be lost - and it will be much easier to read the figures.

Author's Response:

I agree with the referee that there are too many lines on this plot.

Author's change in manuscript

Figure 3 in the main manuscript has now been changed to show every second station. The original figure with all the stations has been moved to the Supplementary Material. The caption of Fig. 3 has an extra sentence:



**The plot shows a subset of time series data from 38 stations, and the full data set of 76 stations used in this project is shown in the Supplementary Material.**

#### **Addition Changes in the Manuscript and Supplementary Material**

-The acknowledgements section has an extra sentence for the referee contributions in improving the manuscript.

-In the Supplementary Material three extra maps of the offshore events and tide gauge stations have been added, showing subsets of the information from Figure 1 of the manuscript.
